# Supplementary material for: Geochemistry of deep Tunguska Basin sills, Siberian Traps: correlations and potential implications for the end-Permian environmental crisis
Source: Springer Nature journal article supplement (doi:10.1007/s00410-021-01807-3), 2021-06-08
Supplement: MOESM2 [file 410_2021_1807_MOESM2_ESM.xlsx]

## Sheet: wr geochemistry
Borehole		219	219	219	219	219	219	219	219	219	219	219	219	219	219	219	219	219	219	219	219	219	219	219	219	219	219	219	219	219	260	260	260	260	260	260	260	260	260	260	260	260	260	260	260	274	274	275	275
Sill		B	B	B	B	C	C	C	C	C	D	D	D	D	D	D	D	D	D	D	D	D	D	D	E	E	E	E	E	E	A	A	A	A	A	A	A	A	B	B	B	B	B	B	B	C	C	G	G
sample		219/1285-1300	219/1410-1415	219/1440-1445	219/1455-1465	219/1710-1715	219/1740-1745	219/1770-1775	219/1800-1805	219/1820-1825	219/1925.7	219/1938.6	219/1951.6	219/1952.5	219/1955.3	219/1957.5	219/1973.5	219/1973.9	219/1976.2	219/1979.0	219/2002.25	219/2007.R	219/2010.0	219/2030-2035	219/3849.7	219/3870-3875	219/3891.7	219/3930.6	219/3933.5	219/3940-3945	260/2204.6A	260/2204.8	260/2205.6	260/2206.2	260/2207.7	260/2209.0	260/2210.3	260/2225-2230	260/3004.9	260/3006.9	260/3008.2	260/3025-3030	260/3045-3050	260/3060-3065	260/3090-3095	274/1798.3	274/1800.8	275/2634.2	275/2637.9
available material		cuttings	cuttings	cuttings	cuttings	cuttings	cuttings	cuttings	cuttings	cuttings	core	core	core	core	core	core	core	core	core	core	core	core	core	cuttings	core	cuttings	core	core	core	cuttings	core	core	core	core	core	core	core	cuttings	core	core	core	cuttings	cuttings	cuttings	cuttings	core	core	core	core
description											clean dolerite, medium-fine grained	clean dolerite, medium-fine grained	fine grained clean dolerite - with contact halo	clean dolerite, fine grained	clean dolerite, fine grained. Hand sample with contact	clean dolerite, fine grained. Hand sample with contact	medium-fine grained dolerite with light colored spots	clean dolerite, medium grained	clean dolerite, medium grained, white irregular patches	clean dolerite, medium-coarse grained, cut by white vein (aplitic?)	clean dolerite, medium-coarse grained, cut by pink vein	clean dolerite, fine grained, sorrounding the enclave	clean dolerite, medium grained, with white dominated spots		coarse grained dolerite cut by white vein		clean dolerite, medium-coarse grained		clean, medium grained dolerite		clean dolerite at contact, fine grained		clean dolerite, fine grained	clean dolerite, medium grained	clean dolerite, medium grained	clean dolerite, coarse grained	clean dolerite, medium grained
m below surface	m.b.s.	-1292.5	-1412.5	-1442.5	-1460	-1712.5	-1742.5	-1772.5	-1802.5	-1822.5	-1925.7	-1938.6	-1951.6	-1952.5	-1955.3	-1957.5	-1973.5	-1973.9	-1976.2	-1979	-2002.25	-2007	-2010	-2032.5	-3849.7	-3872.5	-3891.7	-3930.6	-3933.5	-3942.5	-2204.6	-2204.8	-2205.6	-2206.2	-2207.7	-2209	-2210.3	-2227.5	-3004.9	-3006.9	-3008.2	-3027.5	-3047.5	-3062.5	-3092.5	-1798.3	-1800.8	-2634.2	-2637.9
SiO2	wt.%	51.53	49.71	50.23	49.88	50.23	50.88	46.45	49.3	50.07	48.71	47.61	48.94	47.51	47.7	48.52	49.37	50.39	49.33	50.86	49.74	49.26	48.71	49.88	51.32	50.85	50.41	48.46	49.14	50.31	47.87	47.99	48.74	48.28	47.96	48.68	46.81	50.2	45.72	48.16	48.32	49.11	49.39	48.82	48.69	49.13	49.56	45.02	48.49
TiO2	wt.%	1.325	0.919	1.105	1.278	1.293	0.892	0.848	0.931	1.046	1.203	1.271	1.334	1.288	1.344	1.273	1.202	1.631	1.221	1.532	1.148	0.831	1.128	1.191	1.679	1.312	1.094	1.087	1.077	1.21	1.516	1.531	1.518	1.589	1.621	1.592	1.961	1.578	1.672	1.787	1.644	1.848	1.854	1.964	1.865	1.127	1.084	1.431	1.552
Al2O3	wt.%	14.66	14.38	14.77	14.9	14.68	15.85	15.57	16.47	16.12	15.18	14.66	15.19	15.93	15.77	15.78	14.69	14.6	15.46	13.92	15.94	16.18	15.93	15.37	12.57	13.01	13.25	15.48	16.34	14.88	14.22	14.02	14.6	14.76	14.48	13.86	13.53	14.06	13.27	13.61	14.11	13.89	13.87	14.27	15.26	15.15	15	13.92	14.59
Fe2O3tot	wt.%	13.33	12.74	12.68	13.38	12.27	12.98	13.01	12.24	12.63	12.7	13.11	11.96	13.26	13.29	11.18	13.16	14.68	13.25	11.77	11.81	10.9	13.31	12.75	15.65	13.95	11.43	12.49	12.3	12.49	13.71	14.18	14.11	13.9	14.32	14.67	16.59	14.09	11.98	14.78	14.27	14.59	14.51	15.36	15.12	12.64	12.09	13.37	14.19
MnO	wt.%	0.208	0.197	0.199	0.203	0.177	0.201	0.193	0.185	0.191	0.191	0.185	0.196	0.189	0.197	0.135	0.198	0.211	0.192	0.18	0.173	0.16	0.195	0.197	0.206	0.215	0.186	0.196	0.178	0.19	0.21	0.227	0.21	0.185	0.199	0.197	0.216	0.219	0.159	0.214	0.208	0.211	0.216	0.226	0.22	0.186	0.194	0.226	0.217
MgO	wt.%	5.76	9.6	7.41	6.98	6.45	6.3	9.29	8.07	7.4	7.23	7.12	6.72	7.16	6.77	7.13	6.5	5.13	7.28	6.28	7.05	6.63	8.6	7.37	3.98	6.8	7.87	7.95	7.65	7.37	6.37	6.68	6.68	6.46	6.25	6.09	5.16	7.16	6.8	5.67	5.7	6.05	5.83	5.32	5.79	8.01	8.26	6.37	6.72
CaO	wt.%	10.61	11.41	11.08	10.75	11.04	10.98	10.82	10.73	10.66	10.64	10.69	10.69	10.66	10.54	10.02	11.22	10.04	10.87	11.79	11.02	10.7	10.58	10.7	9.22	11.06	12.64	11.1	11.09	11.1	10.79	11.38	10.9	11.19	11.16	11.08	11.14	10.8	13.02	11.25	10.57	11.05	10.9	10.37	9.99	11.1	11.3	10.85	11.04
Na2O	wt.%	2.74	2.02	2.33	2.37	3.14	2.44	2.13	2.19	2.34	2.71	2.71	3.05	2.89	2.55	3.54	2.53	2.88	2.39	3.05	2.43	2.5	2.22	2.29	3.57	2.39	2.2	2.34	2.39	2.24	3.52	2.51	2.73	2.95	3.16	3.06	3.29	2.18	3.88	2.96	3.34	3.1	2.69	2.66	2.87	2.28	2.2	3.56	2.68
K2O	wt.%	0.59	0.35	0.49	0.46	0.5	0.4	0.34	0.37	0.4	0.44	0.48	0.89	0.57	0.64	0.81	0.43	0.75	0.46	0.56	0.52	0.72	0.45	0.43	0.61	0.47	0.4	0.43	0.42	0.41	0.4	0.42	0.45	0.36	0.34	0.37	0.45	0.36	0.5	0.61	0.48	0.41	0.49	0.57	0.56	0.43	0.41	0.4	0.42
P2O5	wt.%	0.2	0.02	0.12	0.16	0.17	0.14	0.09	0.09	0.12	0.14	0.15	0.15	0.13	0.13	0.11	0.13	0.18	0.14	0.17	0.15	0.13	0.13	0.12	0.27	0.17	0.11	0.12	0.11	0.11	0.16	0.16	0.19	0.17	0.16	0.16	0.17	0.15	0.18	0.22	0.2	0.23	0.22	0.22	0.23	0.12	0.13	0.16	0.17
Total	wt.%	100.7	100.6	99.89	100.3	100.5	100.5	98.24	100.3	100.5	99.11	98.95	100.4	100.5	99.75	99.99	99.31	100.5	100	100.6	99.9	98.8	100.6	100.3	99.33	100.4	99.59	99.91	100.4	100.4	99.75	100.4	100.13	100.1	100.2	99.92	99.89	100.8	99.75	100.1	99.84	100.6	100.3	100.3	100.4	100.6	100.8	98.77	100.4
LOI	wt.%	-0.26	-0.77	-0.52	0	0.51	-0.58	-0.51	-0.27	-0.44	-0.05	0.97	1.3	0.91	0.82	1.51	-0.12	0.01	-0.55	0.51	-0.08	0.8	-0.64	0.03	0.27	0.14	0.01	0.26	-0.29	0.06	0.99	1.26	0.08	0.28	0.53	0.16	0.57	0.01	2.57	0.86	1	0.12	0.32	0.51	-0.22	0.4	0.53	3.48	0.37
Mg# (0.15)		49.2566	62.8633	56.762	53.9574	54.147	52.1607	61.599	59.6953	56.8258	56.1186	54.9555	55.7954	54.8125	53.3657	58.8926	52.5967	43.9784	55.2425	54.5166	57.2834	57.7418	59.2084	56.4938	36.3583	52.268	60.7343	58.8456	58.2841	56.9995	51.0702	51.4153	51.5389	51.0769	49.5066	48.2553	41.1317	53.3048	56.0459	46.2882	47.2938	48.2273	47.4402	43.7589	46.2435	58.7385	60.5488	51.6975	51.5468
Sc	ppm	38	39	37	37	38	34	30	28	31	35	34	36	35	35	35	40	36	35	42	34	30	31	35	40	47	51	32	33	38	38	38	37	37	38	41	45	39	35	37	35	37	37	38	32	33	35	35	37
Cr	ppm	180	460	300	250	180	170	250	150	120	140	150	160	160	150	130	170	60	140	140	160	140	130	130	50	50	130	120	170	180	170	140	150	160	140	160	210	170	90	100	90	100	100	110	70	150	190	150	150
V	ppm	293	247	267	299	301	243	226	219	246	288	290	304	292	295	282	309	335	290	353	278	186	237	279	298	346	329	264	252	303	321	325	321	321	334	333	414	334	315	345	327	350	348	357	321	269	277	301	324
Ni	ppm	80	170	130	110	90	90	180	170	140	120	130	110	130	120	120	80	60	120	70	120	140	170	130	30	70	80	150	140	130	90	100	100	100	90	60	50	130	70	80	80	70	70	60	90	150	160	110	110
Co	ppm	45	59	50	50	39	47	61	53	51	51	49	42	46	47	47	48	45	52	39	47	42	56	50	37	48	44	52	48	48	49	49	53	51	46	49	43	50	34	50	46	43	46	46	50	53	53	48	51
Cu	ppm	180	130	110	120	50	130	120	120	130	120	100	20	50	120	30	150	170	160	70	130	80	130	130	230	160	120	130	130	140	120	200	230	210	160	200	220	190	80	250	120	70	180	200	230	130	130	150	220
Zn	ppm	90	80	90	90	70	90	80	80	90	90	70	40	80	90	< 30	80	100	90	30	80	70	90	90	80	110	70	100	70	100	90	120	100	70	100	60	110	100	< 30	100	80	100	110	120	110	70	100	190	100
Ga	ppm	20	16	18	20	19	18	17	18	19	19	19	19	18	18	18	19	21	19	20	19	19	17	18	22	18	16	17	18	18	21	20	21	21	19	20	22	19	20	21	21	21	21	22	22	18	17	20	20
Ge	ppm	1.4	1.4	1.4	1.6	1.5	1.3	1.3	1.3	1.3	1.6	1.4	1.4	1.4	1.4	1.3	1.6	1.5	1.6	1.5	1.5	1.3	1.4	1.4	1.6	1.8	1.7	1.2	1.4	1.5	1.6	1.5	1.7	1.6	1.3	1.5	1.7	1.5	1.4	1.3	1.5	1.6	1.7	1.5	1.5	1.3	1.4	1.5	1.5
Rb	ppm	14	10	12	13	10	9	8	9	9	11	9	9	10	14	8	9	17	12	8	13	14	11	12	13	13	11	11	10	11	9	10	11	8	7	7	9	9	10	15	11	12	11	14	13	10	10	9	10
Sr	ppm	198	176	189	197	370	233	208	223	227	219	234	304	238	252	457	246	246	218	328	240	289	218	219	298	230	203	208	222	208	242	223	207	241	225	239	266	182	268	228	213	220	230	224	236	209	213	262	179
Y	ppm	32.5	19.2	23.7	26.4	26.1	22.3	18.3	18.7	22.1	25.4	25.2	25.8	24	25.5	24.6	23.7	32.7	25.2	30.6	24.7	23.5	22.8	23.9	48.2	30.5	23.6	22.3	22.6	22.3	30.4	29.2	31.5	30.7	30.3	31.4	37.9	28.1	31.8	34.8	31.9	35.2	35.7	37.3	36.1	22.3	22	28.3	29.8
Zr	ppm	107	62	84	94	95	74	50	72	79	87	94	93	89	93	89	77	126	88	111	90	91	86	83	204	102	74	73	80	84	103	102	107	114	108	108	112	104	113	120	115	133	137	140	132	77	75	78	100
Nb	ppm	4.7	2.3	3.2	3	3.9	2.7	2	2.6	2.8	3.8	5.5	4.1	3.3	3.5	3.8	3.4	5.3	3.9	4.4	3.7	3.3	3.6	2.9	8	3.3	3	3.3	3.5	3	4.5	4.4	4.9	4.6	4	4.4	4.5	3.8	5.2	5.7	5.4	4.5	4.7	6.3	6.4	4	3.7	3.8	5.7
Cs	ppm	0.4	0.3	0.4	0.3	0.4	0.3	0.2	0.3	0.3	0.3	0.4	0.5	0.5	0.8	0.3	0.4	0.6	0.3	0.3	0.4	0.8	0.4	2.3	0.3	0.4	0.4	0.5	0.2	0.3	0.4	0.3	0.3	0.2	0.2	0.2	0.2	0.2	0.2	0.5	0.3	0.3	0.3	0.4	0.4	0.2	0.3	0.4	0.3
Ba	ppm	191	92	121	141	168	148	118	127	140	139	144	128	131	146	126	130	200	139	122	143	175	135	145	226	140	102	140	129	133	112	119	113	99	88	95	114	108	93	155	133	149	150	167	176	119	126	161	122
La	ppm	10.4	4.28	6.24	7.12	7.31	6.4	5.94	5.61	6.57	7.99	9.46	8.02	7.89	8.59	7.06	6.81	10.8	7.8	10.7	8.15	7.9	7.81	6.73	17.2	9.07	6.64	7.28	7.35	6.58	7.75	7.84	8.37	7.74	7.67	7.65	9.16	6.94	8.39	10.5	9.58	9.72	10.4	11.1	11.3	7.33	7.24	7.27	7.62
Ce	ppm	24.5	10.3	14.6	17	17.2	14.8	13.7	12.5	15	18.7	21.5	19.3	18.3	18.9	16.9	16.5	25	18.6	24.5	19.2	18.4	18.1	16	40.3	21.3	15.6	16.6	17.1	15.2	19.4	18.9	20.4	19.5	18.8	19.6	23.1	17	20.7	25.1	23	23.4	24.6	25.6	26.9	16.8	16.7	17	18.5
Pr	ppm	3.42	1.57	2.05	2.33	2.4	2.04	1.87	1.71	2.04	2.52	2.87	2.56	2.42	2.57	2.33	2.27	3.42	2.53	3.26	2.58	2.45	2.41	2.23	5.26	2.94	2.2	2.27	2.27	2.05	2.76	2.71	2.81	2.79	2.61	2.73	3.25	2.41	2.98	3.5	3.2	3.3	3.51	3.66	3.8	2.3	2.29	2.49	2.62
Nd	ppm	15.4	7.41	9.97	11.3	11.1	9.3	8.23	8.15	9.75	11.7	13	11.9	11.1	11.4	10.9	10.6	15.6	11.6	13.9	11.9	11.3	10.8	10.4	24.3	13.4	10.1	9.93	10.5	9.46	12.6	13	13.7	12.9	12.9	13.1	15.4	12.1	14.2	16.2	15	15.4	15.9	17.4	17.4	10.3	10.1	11.9	12.4
Sm	ppm	4.76	2.58	3.15	3.51	3.29	2.67	2.45	2.12	2.79	3.43	3.5	3.47	3.19	3.33	3.32	3.1	4.26	3.31	4.13	3.41	3.15	3.03	3.04	6.85	3.84	2.82	2.92	2.84	2.88	4.02	4.02	4.01	4	3.95	4.29	4.85	3.84	4.42	4.83	4.57	4.53	4.74	5.25	4.9	2.86	2.97	3.68	3.9
Eu	ppm	1.65	0.886	1.19	1.23	1.15	1.19	0.999	0.97	1.09	1.21	1.23	1.21	1.15	1.2	1.06	1.23	1.51	1.22	1.42	1.12	1.18	1.13	1.2	2.17	1.27	1.04	1.06	1.03	1.09	1.41	1.38	1.48	1.44	1.35	1.42	1.61	1.38	1.38	1.61	1.45	1.55	1.6	1.63	1.73	1.01	1.06	1.32	1.39
Gd	ppm	5.39	3.06	3.76	4.22	3.85	3.33	2.98	2.83	3.38	3.99	4.12	4.4	3.98	4.32	4.16	3.83	5.21	4.02	4.94	3.97	3.87	3.61	3.73	8.32	4.45	3.56	3.62	3.43	3.23	4.86	4.79	5.06	4.76	4.98	5.15	6.16	4.36	5.21	5.8	5.15	5.71	5.8	5.91	5.97	3.55	3.52	4.58	4.76
Tb	ppm	0.96	0.54	0.65	0.71	0.69	0.62	0.53	0.51	0.59	0.72	0.74	0.7	0.7	0.74	0.69	0.67	0.92	0.72	0.85	0.69	0.68	0.66	0.64	1.38	0.83	0.64	0.63	0.62	0.6	0.88	0.88	0.91	0.86	0.87	0.88	1.06	0.78	0.95	1.02	0.95	1	1.01	1.04	1.09	0.63	0.65	0.79	0.82
Dy	ppm	5.91	3.38	4.04	4.42	4.36	3.88	3.36	3.22	3.73	4.46	4.58	4.45	4.24	4.56	4.28	4.19	5.75	4.63	5.62	4.5	4.15	4.15	3.91	8.45	5.31	4.19	4	3.98	3.83	5.56	5.57	5.51	5.49	5.43	5.82	6.69	4.98	5.81	6.33	5.88	6.03	6.17	6.8	6.77	4.1	4.16	4.84	5.07
Ho	ppm	1.19	0.69	0.85	0.9	0.88	0.81	0.67	0.67	0.76	0.89	0.92	0.91	0.85	0.88	0.9	0.86	1.17	0.93	1.13	0.9	0.81	0.79	0.82	1.74	1.09	0.86	0.82	0.81	0.79	1.11	1.12	1.14	1.14	1.1	1.17	1.37	1.02	1.2	1.26	1.21	1.24	1.26	1.37	1.37	0.82	0.8	1	1.04
Er	ppm	3.5	1.99	2.48	2.6	2.48	2.29	2.01	1.94	2.23	2.59	2.69	2.49	2.45	2.58	2.55	2.5	3.37	2.66	3.24	2.57	2.32	2.33	2.35	5.05	3.21	2.43	2.37	2.29	2.33	3.2	3.13	3.27	3.17	3	3.32	3.94	2.88	3.46	3.74	3.47	3.65	3.61	4.08	3.88	2.38	2.37	2.95	3.14
Tm	ppm	0.508	0.295	0.352	0.379	0.374	0.354	0.291	0.287	0.335	0.386	0.403	0.369	0.358	0.376	0.358	0.369	0.502	0.387	0.486	0.377	0.341	0.341	0.359	0.741	0.466	0.351	0.347	0.338	0.345	0.469	0.447	0.481	0.462	0.434	0.496	0.558	0.415	0.485	0.544	0.5	0.529	0.518	0.563	0.554	0.36	0.353	0.421	0.452
Yb	ppm	3.26	1.99	2.23	2.65	2.58	2.42	2.01	1.89	2.24	2.55	2.53	2.61	2.36	2.54	2.35	2.48	3.15	2.56	3.01	2.43	2.32	2.35	2.41	4.91	3.08	2.29	2.26	2.31	2.3	3.07	2.9	3.16	2.91	2.88	3.19	3.89	2.67	3.2	3.56	3.25	3.45	3.36	3.73	3.66	2.33	2.32	2.7	2.87
Lu	ppm	0.495	0.306	0.343	0.401	0.417	0.386	0.308	0.301	0.331	0.394	0.386	0.418	0.378	0.406	0.377	0.374	0.49	0.393	0.492	0.374	0.362	0.368	0.378	0.827	0.472	0.365	0.343	0.35	0.353	0.464	0.454	0.5	0.454	0.455	0.487	0.627	0.414	0.5	0.529	0.509	0.525	0.52	0.548	0.542	0.352	0.366	0.4	0.416
Hf	ppm	2.7	1.4	2.1	2.2	2.3	1.8	1.4	1.7	1.8	2.3	2.7	2.4	2.1	2.4	2.3	2	3.2	2.2	3.1	2.2	2.2	2.2	1.9	4.9	2.5	1.8	1.9	2	1.9	2.8	2.7	2.8	2.9	2.7	2.9	3.2	2.5	3	3.1	3	3	3	3.6	3.3	2.1	2	2.1	2.7
Ta	ppm	0.28	0.12	0.18	0.21	0.21	0.15	0.17	0.19	0.16	0.23	0.35	0.26	0.26	0.3	0.26	0.21	0.32	0.21	0.3	0.21	0.26	0.21	0.22	0.54	0.27	0.22	0.26	0.19	0.23	0.23	0.29	0.41	0.35	0.31	0.34	0.31	0.2	0.33	0.36	0.32	0.3	0.32	0.42	0.39	0.23	0.24	0.27	0.31
Pb	ppm			8					7															6		15		7			6																	17
Th	ppm	1.28	0.51	0.8	0.98	1.15	0.83	0.84	0.78	0.98	1.16	1.24	1.13	1.04	1.1	1	1.01	1.54	1.15	1.47	1.2	1.11	1.08	0.96	2.37	1.26	0.9	1.14	1.04	0.93	0.94	1.02	1.06	0.95	0.84	1.05	1.01	0.8	1.42	1.43	1.3	1.28	1.33	1.49	1.48	1.04	1.08	0.84	0.89
U	ppm	0.48	0.24	0.34	0.41	0.43	0.34	0.35	0.37	0.4	0.49	0.56	0.47	0.43	0.47	0.36	0.43	0.7	0.53	0.68	0.48	0.49	0.45	0.4	1.04	0.48	0.38	0.45	0.38	0.39	0.42	0.35	0.39	0.37	0.33	0.42	0.41	0.29	0.63	0.67	0.53	0.55	0.78	0.68	0.71	0.41	0.4	0.31	0.36
Eu*		0.992968	0.961196	1.05401	0.974191	0.98496	1.21652	1.127	1.20715	1.08197	0.997013	0.987351	0.943938	0.983807	0.96442	0.869439	1.08811	0.977017	1.01949	0.958294	0.927886	1.0302	1.04148	1.08627	0.876197	0.936499	1.00054	0.993823	1.00596	1.08938	0.972382	0.958622	1.00153	1.00595	0.927832	0.920884	0.89787	1.02806	0.876593	0.92723	0.911077	0.928995	0.930177	0.891997	0.975012	0.966214	0.999322	0.980091	0.983395
87Sr/86Sr measured			0.705184	0.705311		0.70725			0.705702			0.705975		0.705369						0.707084			0.705899	0.705868	0.706774	0.706348	0.706137	0.705798		0.705829	0.705707	0.705743	0.705422	0.705678		0.705707		0.705052				0.705535		0.705455
2s			7e-06	9e-06		8e-06			8e-06			9e-06		8e-06						8e-06			8e-06	7e-06	8e-06	8e-06	8e-06	8e-06		8e-06	9e-06	9e-06	6e-06	8e-06		8e-06		8e-06				8e-06		8e-06
87Rb/86Sr			0.16029	0.179119		0.0762614			0.113862			0.108512		0.118536						0.0688201			0.142359	0.154591	0.123087	0.159472	0.152882	0.149202		0.0949468	0.104922	0.126514	0.149917	0.0936509		0.0826305		0.139503				0.153884		0.176323
87Sr/86Sr 250 Ma			0.70461	0.70467		0.706977			0.705295			0.705587		0.704945						0.706838			0.70539	0.705315	0.706334	0.705777	0.70559	0.705264		0.705489	0.705332	0.70529	0.704886	0.705343		0.705411		0.704553				0.704984		0.704824
2s including dec. const.			5.28106e-05	6.01924e-05		2.97954e-05			4.05416e-05			4.00128e-05		4.18774e-05						2.76687e-05			4.86861e-05	5.11819e-05	4.31783e-05	5.35769e-05	5.16935e-05	5.06418e-05		3.51357e-05	3.89868e-05	4.51576e-05	4.8846e-05	3.47654e-05		3.16158e-05		4.78699e-05				5.19798e-05		5.83931e-05
143Nd/144Nd measured			0.512699	0.512671		0.512671			0.51267			0.512653		0.512656						0.512634			0.512668	0.512676	0.512671	0.512694	0.512702	0.512674		0.512686	0.512746	0.512741	0.512746	0.512745		0.512755		0.512765				0.512728		0.512731
2s			5e-06	7e-06		5e-06			6e-06			1.2e-05		6e-06						1.1e-05			1.3e-05	6e-06	8e-06	6e-06	1.3e-05	5e-06		6e-06	6e-06	6e-06	8e-06	9e-06		6e-06		6e-06				6e-06		5e-06
147Sm/144Nd			0.219804	0.199456		0.187113			0.164214			0.169963		0.181425						0.18757			0.177113	0.184532	0.177957	0.180909	0.176263	0.19486		0.183095	0.201416	0.195219	0.184783	0.195753		0.206741		0.200349				0.185701		0.190479
143Nd/144Nd 250 Ma			0.512339	0.512345		0.512365			0.512401			0.512375		0.512359						0.512327			0.512378	0.512374	0.51238	0.512398	0.512414	0.512355		0.512386	0.512416	0.512422	0.512444	0.512425		0.512417		0.512437				0.512424		0.512419
epsilon Nd 250 Ma			0.452726	0.556118		0.950336			1.66223			1.14677		0.839223						0.213543			1.21119	1.13037	1.24278	1.59744	1.90197	0.761452		1.37147	1.95743	2.05779	2.48869	2.11879		1.96305		2.3624				2.10803		2.01398
[truncated: 27 more columns]

## Sheet: Mineral chemistry
OLIVINE
Rock sample	Analytical spot	SiO2	FeOt	MnO	MgO	CaO	NiO	Total				Fo	Fa	Teph	Mg#
		wt.%	wt.%	wt.%	wt.%	wt.%	wt.%	wt.%				%	%	%
219 1440-45	homogeneous olivine 1	34.0319	45.4939	0.6358	19.6935	0.10228	0.03602	100.021				43.2107	55.9967	0.792611	43.5559
218 1440-45	STDEV on 5 analyses	0.0608937	0.358531	0.0175646	0.126037	0.0191329	0.0339811
219 1440-45	homogeneous olivine 1	33.734	46.8299	0.6939	18.633	0.10496	0.04236	100.057				41.1342	57.9954	0.87043	41.4953
219 1440-45	STDEV on 5 analyses	0.274207	0.195781	0.0341938	0.144579	0.0193512	0.014655
219/1710-15	olivine core	37.1371	28.7226	0.415367	33.9824	0.2097		100.467				67.5182	32.0129	0.468921	67.8363
219/1710-15	STDEV on 3 analyses	0.259172	0.573248	0.0323001	0.226304	0.0263513
219/1710-15	olivine rim	36.8518	31.3323	0.415633	31.6184	0.329533		100.548				63.9543	35.568	0.47769	64.2614
219/1710-15	STDEV on 3 analyses	0.281029	1.3815	0.0110437	1.18098	0.198273
219/1973.9	olivine c-r line	32.8159	50.8286	0.8208	15.1286	0.3078	0.0277	99.9294				34.2984	64.6443	1.05728	34.6649
219/1973.9	olivine c-r line	32.9251	49.3519	0.8778	16.5115	0.2327	0.0396	99.9386				36.9421	61.9421	1.11585	37.3589
219/1973.9	olivine c-r line	32.7645	50.0022	0.8717	16.084	0.3831	0.033	100.139				36.0389	62.8513	1.10974	36.4434
219/1973.9	olivine c-r line	32.5976	50.9591	0.8584	15.2596	0.2465	0.0264	99.9476				34.4194	64.4806	1.10009	34.8022
219/1973.9	olivine c-r line	32.2926	53.0009	0.9511	13.5174	0.3556	0.0395	100.157				30.8685	67.8974	1.23403	31.2542
219/1973.9	olivine c-r line	32.2573	54.4067	0.9429	11.8979	0.3054	0.0512	99.8614				27.6987	71.0541	1.24719	28.0485
219/1973.9	bright portions in olivine (core and rim)	31.1943	57.0656	1.73227	9.2645	0.0306333		99.2874				21.8924	75.7762	2.3314	22.4041
	STDEV on 3 analyses	0.331843	2.45299	0.254588	1.94611	0.0294694
219/1976.2	olivine core	36.2858	33.6476	0.51684	29.6431	0.276	0.1229	100.394				60.7216	38.6767	0.601732	61.089
219/1976.2	STDEV on 5 analyses	0.289262	0.728514	0.0240988	0.793293	0.0391779
219/1976.2	olivine middle	35.192	37.1759	0.567437	26.9857	0.14255	0.05738	100.099				56.0284	43.3023	0.66935	56.4058
219/1976.2	STDEV on 8 analyses	0.422088	0.872952	0.0352314	0.578827	0.0622187	0.0495772
219/1976.2	olivine rim	35.0355	39.2523	0.626225	25.0426	0.154525	0.0701	100.146				52.7568	46.4919	0.751269	53.1543
219/1976.2	STDEV on 4 analyses	0.672876	2.94756	0.0505115	2.49464	0.0481093	0.0128693
219/1976.2	olivine in plag cpx	34.9262	40.8508	0.606	23.058	0.2571	0.1338	99.8319				49.7811	49.4756	0.743349	50.1539
219/2007.A	homogeneous olivine 1	33.8911	42.809	0.58197	22.0715	0.18084		99.5344				47.5464	51.7412	0.712388	47.8876
219/2007.A	STDEV on 10 analyses	0.442923	0.323936	0.0462792	0.458571	0.0336822
219/2007.A	small homogeneous olivine 2	33.9489	41.7502	0.532225	23.1219	0.118575		99.4718				49.358	49.9966	0.64548	49.6786
219/2007.A	STDEV on 4 analyses	0.191478	0.174563	0.0323773	0.0909538	0.0248367
219/2007.A	small homogeneous olivine 3	33.8055	42.3376	0.59575	22.4579	0.1142		99.3109				48.2478	51.0248	0.727397	48.6013
219/2007.A	STDEV on 4 analyses	0.111559	0.270168	0.0403682	0.14003	0.0302555
219/2007.A	homogeneous olivine 4	34.2639	40.3148	0.605575	24.2862	0.18525		99.6556				51.4025	47.8691	0.728356	51.7796
	STDEV on 12 analyses	0.303237	0.22028	0.0468513	0.264134	0.0322723
219-2040-2045	homogeneous olivine	38.2468	21.2492	0.328914	40.5186	0.181514		100.525				76.9921	22.6528	0.355079	77.2663
	STDEV on 7 analyses	0.369435	0.688233	0.0560128	0.535425	0.0436569
219/3930.6	homogeneous olivine 1	34.2559	41.7691	0.619414	23.566	0.100957		100.311				49.7689	49.4879	0.743198	50.1416
	STDEV on 14 analyses	0.280291	0.55651	0.0546228	0.400062	0.0355877
219/3933.5	homogeneous olivine 1	35.0965	39.9033	0.594094	24.1768	0.154894		99.9255				51.5421	47.7381	0.71978	51.9156
	STDEV on 17 analyses	0.292704	1.00243	0.0341892	0.846036	0.0350825
260-2204.6A	homogeneous olivine with MI	38.5591	21.772	0.329437	39.2343	0.322034		100.301				75.9839	23.6536	0.362497	76.2603
	STDEV on 24 analyses	0.150374	0.211575	0.0242904	0.0992159	0.0215509
260/2207.7	olivine core	37.4907	27.6748	0.414241	34.6845	0.3347	0.130636	100.73				68.6437	30.888	0.468383	68.9621
260/2207.7	STDEV on 22 analyses	0.862542	4.19464	0.0751898	3.48489	0.0402905	0.0406104
260/2207.7	olivine middle	35.5948	36.5592	0.575692	26.9874	0.289054	0.0810077	100.087				56.2625	43.0499	0.687617	56.6412
260/2207.7	STDEV on 13 analyses	0.9869	5.51082	0.121423	4.30485	0.0354508	0.0514279
260/2207.7	olivine rim	32.746	52.8393	1.07477	13.0275	0.236617	0.0453	99.45				30.0952	68.4937	1.41105	30.5255
260/2207.7	STDEV on 14 analyses	0.652907	2.65581	0.101579	2.21463	0.0290269	0.0244347
260/3008.2	olivine homogeneous	37.2799	25.0668	0.380153	36.6694	0.351909		99.7482				71.9736	27.6024	0.424024	72.2799
260/3008.2	ST.DEV on 58 analyses	0.319054	0.732344	0.027162	0.537239	0.0324264
260/3025-3030	olivine	34.9109	39.0837	0.7871	24.9125	0.1764		99.8706				52.686	46.3683	0.945768	53.189
260/3025-3030	olivine	35.2226	37.8923	0.6897	25.1497	0.2163		99.1706				53.7405	45.4221	0.837349	54.1943
260/3025-3030	olivine	34.6846	40.2415	0.6326	23.0287	0.1758		98.7632				50.1029	49.1151	0.781988	50.4978
260/3025-3030	olivine	34.6457	39.9862	0.8846	23.9593	0.1759		99.6517				51.0932	47.835	1.0718	51.6467
260/3025-3030	olivine	36.0204	33.8602	0.7009	29.1357	0.2469		99.9641				60.0379	39.1415	0.820604	60.5347
260/3025-3030	olivine	35.7192	33.5872	0.7868	29.1195	0.3539		99.5666				60.154	38.9226	0.923468	60.7146
260/3025-3030	olivine	35.0545	38.3589	0.9682	24.978	0.1655		99.5251				53.092	45.7388	1.16927	53.7201
260/3025-3030	ol in groundmass	35.6278	32.8968	1.0263	30.0804	0.1599		99.7912				61.2411	37.5717	1.18717	61.9769
260/3025-3030	ol in groundmass	35.355	34.4396	0.7075	29.1003	0.1257		99.7281				59.6046	39.572	0.823353	60.0995
260/3025-3030	groundmass phase (ol)	35.2901	37.4363	1.2296	25.2072	0.2015		99.3647				72.8737	26.7015	0.424797	73.1846
260/3025-3030	olivine zoned, c-r	37.7525	24.4591	0.3842	37.4476	0.3397		100.383				72.7107	26.9052	0.384088	72.9911
260/3025-3030	olivine zoned, c-r	38.0826	24.6967	0.3481	37.4411	0.3723		100.941				72.37	27.2427	0.387308	72.6514
260/3025-3030	olivine zoned, c-r	37.8839	24.9767	0.3506	37.2213	0.3415		100.774				72.2777	27.2505	0.471787	72.6203
260/3025-3030	olivine zoned, c-r	37.943	24.8919	0.4255	37.0369	0.3761		100.673				66.7757	32.5996	0.624644	67.1955
260/3025-3030	olivine zoned, c-r	37.1732	28.8498	0.5458	33.151	0.3582		100.078				53.7389	44.7718	1.48938	54.5513
260/3025-3030	zoned olivine phenocryst, c-r	37.3583	25.2394	0.3766	36.5592	0.3565		99.89				71.7805	27.7994	0.420114	72.0833
260/3025-3030	zoned olivine phenocryst, c-r	37.7533	25.8592	0.3846	36.1234	0.3583		100.479				71.0414	28.5289	0.429743	71.348
260/3025-3030	zoned olivine phenocryst, c-r	37.3243	26.7037	0.4377	35.3115	0.3849		100.162				69.8678	29.6401	0.492056	70.2133
260/3025-3030	zoned olivine phenocryst, c-r	36.8095	29.0474	0.47	32.9962	0.4024		99.7255				66.5806	32.8805	0.538839	66.9413
260/3025-3030	zoned olivine phenocryst, c-r	36.3846	33.7782	0.6374	29.0275	0.2681		100.096				60.0504	39.2004	0.749196	60.5037
260/3025-3030	c-r zoned olivine	37.6395	24.6325	0.4126	37.0866	0.3299		100.101				72.5206	27.0209	0.458407	72.8546
260/3025-3030	c-r zoned olivine	37.2999	24.8482	0.3942	36.9541	0.3851		99.8815				72.2926	27.2693	0.438152	72.6107
260/3025-3030	c-r zoned olivine	37.4293	24.9745	0.3942	36.8711	0.3902		100.059				72.1474	27.4144	0.438256	72.4649
260/3025-3030	c-r zoned olivine	37.4126	25.7886	0.3455	36.6758	0.3685		100.591				71.4385	28.1791	0.382365	71.7127
260/3025-3030	c-r zoned olivine	36.7033	30.8559	0.4512	32.4615	0.3302		100.802				64.8874	34.6001	0.512434	65.2217
260/3025-3030	c-r zoned olivine	35.1563	36.026	0.6081	27.5069	0.3309		99.6282				57.2318	42.0493	0.718866	57.6462
260/3025-3030	c-r zoned olivine	34.4049	39.2902	0.7527	24.802	0.2038		99.4536				52.468	46.6273	0.904706	52.9471
260/3025-3030	olivine in groundmass	35.3162	36.3935	0.864522	26.8492	0.202444		99.6259				70.4939	29.2823	0.223802	70.6512
	ST.DEV on 9 analyses	0.42554	2.68512	0.181876	2.42587	0.0666666
260/3025-3030	olivine core	37.6254	25.1882	0.386709	36.7935	0.363909		100.358				54.7082	44.8427	0.449096	54.955
	ST.DEV on 11 analyses	0.275886	0.669764	0.0308108	0.626204	0.020377
260/3025-3030	olivine rim	36.1053	32.9746	0.577533	29.9908	0.3156		99.9639				65.7819	33.8563	0.361836	66.0171
	ST.DEV on 6 analyses	1.08295	4.1658	0.1129	3.43933	0.0700739
260-3045-50	olivine core	37.7337	26.225	0.402514	35.3965	0.333971		100.136				70.3189	29.2268	0.454308	70.6398
260-3045-50	STDEV on 7 analyses	0.191299	0.725516	0.0269196	0.451869	0.0219836
260-3045-50	olivine intermediate	36.62	30.8067	0.482988	31.6386	0.269069		99.8614				64.2746	35.1671	0.558345	64.6339
260-3045-50	STDEV on 16 analyses	0.531944	2.60653	0.0541008	2.06061	0.044257
260-3045-50	olivine rim	33.8788	44.8554	0.717686	19.7948	0.498014		99.8835				43.4175	55.6794	0.903126	43.7994
260-3045-50	STDEV on 14 analyses	1.00214	5.14709	0.137939	4.2522	0.822309
274-1800.8	olivine core	37.9138	25.4842	0.3707	36.3605	0.2813		100.444				71.4785	28.1074	0.414123	71.7757
274-1800.8	STDEV on 16 analyses	0.302842	0.632931	0.0260242	0.569761	0.0244734
274-1800.8	olivine intermediate	36.8184	30.3908	0.425831	32.3649	0.228877		100.266				65.168	34.3446	0.487455	65.4868
274-1800.8	STDEV on 13 analyses	0.300393	1.40064	0.0396416	1.1272	0.0249752
274-1800.8	olivine rim	35.5953	36.0202	0.5547	28.0476	0.13356		100.393				57.7472	41.6039	0.648976	58.1243
274-1800.8	STDEV on 5 analyses	0.0544812	0.157714	0.0429087	0.180435	0.0238843
275/2634.2	olivine in groundmass	33.5909	47.0864	0.74515	17.711	0.25305		99.3865				39.7601	59.2896	0.950303	82.5761
275/2634.2	ST.DEV on 2 analyses	0.534431	0.472064	0.0805395	0.872711	0.0313248
275/2634.2	olivine core	38.3629	22.3758	0.332333	39.1367	0.345144		100.553				75.4273	24.2085	0.364185	75.7027
275/2634.2	ST.DEV on 9 analyses	0.445966	1.13982	0.0324187	1.16331	0.0541844
275/2634.2	olivine rim	38.2145	23.1589	0.3351	38.734	0.3659		100.808				65.27	34.1981	0.531881	65.619
277/440	homogeneous olivine	32.2157	50.7342	0.858565	15.3527	0.24705		99.4082				34.6549	64.244	1.10108	35.0407
277/440	ST.DEV on 20 analyses	0.216442	0.243452	0.0411313	0.125842	0.0310149
277/495	homogeneous olivine	34.5842	39.0949	0.562911	25.2812	0.0982667		99.6215				53.1876	46.1395	0.672909	53.5479
277/495	ST.DEV on 9 analyses	0.190967	0.360779	0.0342406	0.157742	0.0213579
277-515	homogeneous olivine	35.0011	40.1956	0.608879	24.0691	0.109486		100.009				51.2467	48.0165	0.736712	51.627
277-515	ST.DEV on 14 analyses	0.411257	0.307977	0.0444027	0.446023	0.020944
277 2380-85	homogeneous olivine	35.67	35.7559	0.530738	28.0067	0.122486	0.0952655	100.22				57.8989	41.4775	0.623617	58.262
277 2380-85	ST.DEV on 29 analyses	0.456272	0.729819	0.0405261	0.701444	0.07391	0.037324
277-2420.6	olivine in cpx	36.5174	31.1554	0.459967	30.9536	0.0992333		99.2262				63.57	35.8934	0.536648	63.9129
277-2420.6	ST.DEV on 6 analyses	0.242291	0.265483	0.031333	0.102621	0.0280761
277-2420.6	homogeneous olivine	35.2792	38.7544	0.596554	25.0546	0.110285		99.8261				53.1518	46.1291	0.719157	53.5366
277-2420.6	ST.DEV on 13 analyses	0.198039	0.626672	0.0499047	0.590134	0.0348762
PYROXENE
Rock sample	Analytical spot	SiO2	TiO2	Al2O3	MnO	FeO	MgO	CaO	Na2O	Cr2O3		Total			Wo	En	Fs	Acm	N° Mg
		wt.%	wt.%	wt.%	wt.%	wt.%	wt.%	wt.%	wt.%	wt.%		wt.%			%	%	%	%
219 1440-45	homogeneous cpx	51.9427	0.596043	2.24197	0.210371	8.52664	15.7512	19.9436	0.254471	0.383971		99.8499			40.722	44.7479	13.5899	0.940128	76.7181
	STDEV on 7 analyses	0.343719	0.058134	0.263004	0.0331417	0.859145	0.373575	0.224106	0.0137171	0.199207
219/1710-15	cpx in groundmass	49.9583	1.1447	4.5365	0.2348	9.0897	15.3294	18.8434	0.2885	0.5738		100.015			39.4299	44.6315	14.8461	1.09245	75.0391
219/1710-15	cpx in groundmass	49.9672	1.1562	4.5988	0.2079	8.563	15.2685	19.7371	0.2505	0.4552		100.199			41.0175	44.1502	13.8902	0.942068	76.068
219/1710-15	cpx in groundmass	50.11	1.0261	4.5471	0.1852	8.6763	15.7112	19.2355	0.2403	0.3843		100.108			39.8225	45.2569	14.0203	0.900259	76.3479
219/1973.5A	core	51.6432	0.717443	2.15889	0.297132	11.0653	15.3245	18.7934	0.254521	0.0859		100.343			38.1945	43.3222	17.5473	0.936074	71.1805
	STDEV on 28 analyses	0.595706	0.140498	0.515292	0.040849	0.586472	0.485353	0.75728	0.0260656	0.0494427
219/1973.5A	rim	51.2888	0.81844	2.17105	0.313693	12.2668	14.9018	18.2071	0.26514	0.0580133		100.295			37.1588	42.3193	19.5426	0.979246	68.4319
	STDEV on 15 analyses	0.380566	0.0841161	0.141754	0.0218054	0.970932	0.317203	0.472058	0.022443	0.0492041
219/1973.9	homogeneous cpx	50.4778	0.777544	2.04658	0.379812	13.9844	14.5301	17.1298	0.2594	0.0162437		99.6178			35.3243	38.8075	24.9213	0.946894	60.3665
	STDEV on 15 analyses	0.432451	0.0529472	0.0410845	0.0370311	0.744178	0.221235	0.575729	0.0188778	0.0287171
219/1973.9	cpx in pocket 2	50.855	0.1145	0.2899	0.5563	20.6633	7.2542	20.1852	0.2219	-0.018		100.185			43.1226	21.5632	34.4564	0.857863	38.4922
219/1976.2	cpx core to rim	51.3442	0.6999	2.4952	0.2657	9.0479	15.6731	19.7252	0.2822	0.1329		99.6709			40.1689	44.4093	14.3818	1.03995	75.5374
219/1976.2	cpx core to rim	51.334	0.6568	2.545	0.2276	9.4897	15.6834	19.3196	0.2004	0.1811		99.6383			39.4993	44.6152	15.1441	0.741443	74.6582
219/1976.2	cpx core to rim	52.2253	0.4846	1.7309	0.3085	9.4578	16.4783	19.1569	0.2532	0.1003		100.191			38.3712	45.9244	14.7866	0.917768	75.6443
219/1976.2	cpx core to rim	52.7409	0.5074	1.7241	0.3045	9.3909	16.7953	19.1663	0.2022	0.1327		100.968			38.1562	46.5228	14.5926	0.728445	76.1229
219/1976.2	cpx core to rim	52.446	0.5206	1.7192	0.2857	9.3003	16.587	18.8842	0.2278	0.0955		100.069			38.0463	46.4978	14.6254	0.830531	76.0722
219/1976.2	cpx core to rim	52.5133	0.5695	1.783	0.2249	9.7935	16.7151	19.0808	0.2344	0.0663		100.982			37.8538	46.1395	15.1652	0.84151	75.2625
219/1976.2	cpx core to rim	52.3636	0.545	1.6528	0.2653	9.7236	16.6477	19.015	0.2608	0.1293		100.602			37.8482	46.1056	15.1069	0.939388	75.3206
219/1976.2	cpx core to rim	52.6637	0.5115	1.7134	0.2694	9.6922	16.5434	18.8838	0.2934	0.0792		100.69			37.7688	46.0384	15.1309	1.06192	75.2639
219/1976.2	cpx core to rim	51.2082	0.7619	2.446	0.2181	9.6226	15.6762	19.7572	0.2693	0.0534		99.9948			39.8594	44.0045	15.1529	0.983174	74.3854
219/1976.2	cpx core to rim	51.431	0.783	2.4446	0.2868	9.6216	15.5832	19.6254	0.3089	0.0905		100.175			39.7461	43.912	15.2097	1.13209	74.2739
		52.027
219/1976.2	core of ophitic cpx enclosing an olivine	50.3275	1.08503	2.55493	0.334514	12.57	14.2344	18.5739	0.343857	0.0039		100.044			38.048	40.571	20.1061	1.27486	66.9043
	STDEV on 7 analyses	0.506292	0.146517	0.0518698	0.0274934	1.32345	0.494433	0.585665	0.0383539	0.0272243
219/1979.0	homogeneous cpx 1	51.2553	0.7637	2.70536	0.311029	11.2169	15.4919	17.8292	0.267612	0.166412		100.123			36.6613	44.331	18.0122	0.995446	71.1178
219/1979.0	STDEV on 17 analyses	0.637207	0.0500391	0.327134	0.0373411	0.403334	0.259477	0.617833	0.0209796	0.0299696
219/1979.0	homogeneous cpx2	50.5532	0.778	2.93934	0.2482	9.6164	15.2083	19.657	0.2694	0.24278		99.5147			40.2705	43.3525	15.3781	0.998891	73.8157
219/1979.0	STDEV on 10 analyses	0.192959	0.0369539	0.061714	0.0307138	0.0958729	0.130253	0.233224	0.0238976	0.0330027
219/1979.0	homogeneous cpx3	50.9867	0.80272	2.46258	0.3137	11.8741	15.0759	18.114	0.26572	0.06639		99.9644			37.0886	42.9491	18.9775	0.984712	69.3558
219/1979.0	STDEV on 10 analyses	0.400575	0.0293311	0.0705594	0.0394321	0.225396	0.171	0.194912	0.0176354	0.0224894
219/1979.0	homogeneous opx	50.4529	0.410654	0.656138	0.695346	27.4436	14.8457	5.10892	0.0740462	-0.0146231		99.6798			10.7958	43.6517	45.2693	0.283141	49.0978
219/1979.0	STDEV on 13 analyses	0.299797	0.0268317	0.0504707	0.0417233	0.803807	0.257538	0.850876	0.0227904	0.0272882
219/2007.0 A	core cpx 1	50.3649	1.15408	2.19678	0.371025	12.4878	14.1849	18.5065	0.29145	0.008025		99.5678			38.1465	40.6782	20.0882	1.08705	66.9888
219/2007.0 A	STDEV on 4 analyses	0.0789057	0.0506638	0.0951023	0.0209672	1.14493	0.500866	1.44445	0.0204816	0.0104628
219/2007.0 A	rim cpx 1 Ca-rich	49.9712	0.46245	0.9126	1.0042	14.6429	8.48647	23.2922	0.1808	0.00871667		99.3393			49.7111	25.181	24.4101	0.697786	50.749
219/2007.0 A	STDEV on 6 analyses	0.553366	0.0915772	0.260645	0.178088	1.21364	0.946577	0.278006	0.0285584	0.0334901
219/2007.A	cpx 2 ophitic core	50.1659	0.96584	1.79602	0.38274	14.4691	15.1908	16.0715	0.23018	0.01864		99.2945			32.8543	43.2073	23.0865	0.851881	65.175
219/2007.A	STDEV on 5 analyses	0.290229	0.0673929	0.0968946	0.0213975	0.175011	0.171172	0.176253	0.0235624	0.0231666
219/2007.A	cpx2 ophitic intermediate	50.5096	1.00983	1.85098	0.375453	13.3489	14.5388	17.7784	0.246933	-0.00280667		99.657			36.3783	41.3893	21.3182	0.914185	66.0418
219/2007.A	STDEV on 15 analyses	0.388392	0.0885198	0.13798	0.0356481	0.971873	0.426467	1.22375	0.0291768	0.0284454
219/2007.A	cpx 2 ophitic rim	50.6641	0.88108	1.61196	0.33716	13.2989	14.1441	18.2757	0.25914	-0.01138		99.4628			37.446	40.3244	21.2691	0.960505	65.4916
219/2007.A	STDEV on 5 analyses	0.355294	0.0484543	0.107003	0.0414773	0.793762	0.320197	1.0157	0.0359509	0.0270527
219-2040-2045	cpx in groundmass	51.5879	0.4016	0.6104	0.3021	14.5365	11.674	20.7644	0.5717	0.0216		100.486			42.043	32.8885	22.9738	2.09474	58.8743
219-2040-2045	cpx in groundmass	50.4914	0.7608	1.7044	0.2556	10.6229	13.1927	21.2622	0.5429	0.0725		98.9128			43.4876	37.5441	16.9589	2.0094	68.8844
219-2040-2045	cpx in groundmass	52.2319	0.4084	1.0865	0.2125	7.7535	14.5475	22.5873	0.7699	0.0409		99.6507			44.9285	40.2622	12.038	2.77128	76.9829
219-2040-2045	cpx in groundmass	51.1562	0.2611	2.1613	0.1805	9.0925	13.9361	21.6299	0.3477	0.0136		98.8971			44.3719	39.7782	14.5591	1.29076	73.2061
219-2040-2045	cpx in groundmass	51.4144	0.0606	0.7474	0.1849	8.8461	14.4429	22.3683	0.3024	0.0305		98.4324			44.8118	40.2591	13.8328	1.0963	74.4273
219/3870-3875	cpx core	50.4941	0.820312	2.2015	0.3837	14.5502	13.5336	17.8194	0.232513	0.001875		100.037			36.795	38.884	23.4522	0.86884	62.3832
219/3870-3875	STDEV on 8 analyses	0.171897	0.0135096	0.046302	0.0262472	0.40075	0.117188	0.383791	0.0321565	0.020536
219/3870-3875	cpx rim	49.959	0.6601	1.75565	0.4959	19.9825	12.417	14.4919	0.1841	0.0211		99.9724			30.3823	36.2088	32.7109	0.698048	52.5374
219/3870-3875	STDEV on 2 analyses	0.161857	0.0380423	0.155069	0.00989949	0.993697	0.838699	0.132158	0.019799	0.0046669
219/3870-3875	patchy cpx bright	51.048	0.716933	2.0311	0.352867	13.6391	14.7396	17.7909	0.240567	0.0486667		100.621			36.0203	41.5187	21.5787	0.882214	65.8707
219/3870-3875	STDEV on 3 analyses	0.83818	0.197892	0.120602	0.0564143	2.2037	0.96185	0.854355	0.033473	0.0262613
219/3870-3875	patchy cpx dark	51.6059	0.5689	2.35937	0.2544	10.2989	16.2182	19.0841	0.232233	0.0854		100.704			38.0855	45.0338	16.042	0.838645	73.7427
219/3870-3875	STDEV on 3 analyses	0.296884	0.0969223	0.30003	0.0531384	0.61973	0.111644	0.316917	0.0169211	0.0210174
219/3891.7	homogeneous opx with exsolutions	52.377	0.311764	0.851636	0.523936	22.5079	21.3265	1.95816	0.0153571	0.021		99.8982			3.98309	60.2718	35.6885	0.0566473	62.8086
219/3891.7	STDEV on 14 analyses	0.242833	0.037296	0.073735	0.042597	0.57323	0.597719	0.91553	0.0151806	0.0309785
219/3891.7	high Ca points in opx	52.0154	0.577275	1.61793	0.33735	14.1345	16.092	15.004	0.21575	0.029325		100.032			30.725	45.8702	22.604	0.800717	67.0288
219/3891.7	STDEV on 4 analyses	0.384369	0.0488277	0.047044	0.0511712	1.41032	1.18338	2.70653	0.0320929	0.0281636
219/3891.7	intermediate Ca points in opx	52.297	0.397333	1.08863	0.5229	19.8804	19.7016	6.0486	0.0953667	0.0274		100.078			12.3099	55.7702	31.5689	0.35101	63.857
219/3891.7	STDEV on 3 analyses	0.371565	0.00568888	0.0313562	0.0235081	0.756302	0.463264	0.148142	0.00408697	0.00432782
219/3930.6	opx in patchy altered area rim close to biotite	52.2342	0.2555	0.748125	0.5307	25.2804	19.9833	1.64295	0.013525	-0.00985		100.683			3.33994	56.4889	40.1219	0.0492499	58.4706
219/3930.6	STDEV on 5 analyses	0.605095	0.0120739	0.285175	0.0404106	0.974749	0.994036	0.0412222	0.0161207	0.0221687
219/3930.6	opx in patchy altered area core	52.1035	0.12425	0.23295	0.66825	29.9255	17.3608	1.10565	-0.0014	-0.02855		101.504			2.27492	49.6882	48.0422	-0.00530263	50.8429
219/3930.6	STDEV on 2 analyses	0.635335	0.00968736	0.111228	0.010253	0.766362	0.135552	0.0980757	0.00735391	0.00106066
219/3930.6	opx in patchy altered area	50.4316	-0.00235	0.12935	0.72505	33.8329	14.513	0.58155	0.0113	-0.01665		100.206			1.23209	42.7796	55.9451	0.0432393	43.3322
219/3930.6	STDEV on 2 analyses	0.2885	0.00106066	0.028355	0.027365	0.221395	0.0421436	0.0306177	0.0173948	0.025668
219/3930.6	cpx homogeneous	51.4966	0.659787	2.14214	0.30698	11.7869	16.7162	16.771	0.245427	0.0182067		100.157			33.7517	46.8274	18.5272	0.893778	71.6763
219/3930.6	STDEV on 15 analyses	0.201896	0.0335773	0.0643158	0.040701	0.758088	0.171781	0.904831	0.031364	0.0175438
219/3930.6	cpx ophitic homogeneous	51.5101	0.54758	2.37013	0.237995	8.69799	16.5205	19.6345	0.26594	0.08628		99.8724			39.3548	46.0727	13.608	0.964528	77.1993
219/3930.6	STDEV on 20 analyses	0.258277	0.0304529	0.0989426	0.0295044	0.182136	0.154804	0.169288	0.0224835	0.037235
219/3930.6	cpx ophitic homogeneous	51.4666	0.534311	2.57602	0.223489	8.11736	16.6198	19.9648	0.2544	0.174289		99.9271			40.0212	46.3552	12.701	0.922619	78.4937
219/3930.6	STDEV on 19 analyses	0.253149	0.0208192	0.0457106	0.0327299	0.0972658	0.105345	0.144145	0.0215515	0.0293933
260-2204.6A	groundmass cpx	50.5925	1.15704	2.13107	0.3156	12.0296	13.1892	19.7723	0.449071	-0.0120571		99.646			40.9152	37.9641	19.439	1.68166	66.1434
260-2204.6A	STDEV on 7 analyses	0.289902	0.119102	0.445305	0.0711008	1.31115	0.809065	0.294659	0.0378291	0.0240066
260/2207.7	ophitic cpx core	49.9745	0.919546	2.51585	0.271146	11.2354	13.8531	19.8427	0.280154	0.0926692		98.9894			41.0037	39.8296	18.1192	1.04758	68.7764
260/2207.7	STDEV on 13 analyses	0.314656	0.0920703	0.438698	0.0360307	1.08662	0.305397	0.768319	0.0191296	0.04016
260/2207.7	ophitic cpx intermediate	49.4714	0.651719	1.05418	0.579663	19.6688	9.59551	17.7776	0.250081	-0.004075		99.0492			37.8813	28.4289	32.7255	0.964394	46.4366
260/2207.7	STDEV on 16 analyses	0.286806	0.114312	0.239672	0.0815519	1.59516	1.2136	0.512643	0.0357814	0.015487
260/2207.7	ophitic cpx rim	50.3914	0.192733	0.360983	0.588683	20.831	7.64648	19.3457	0.33585	-0.00353333		99.701			41.2955	22.6981	34.7092	1.29725	39.4507
260/2207.7	STDEV on 6 analyses	0.441755	0.148504	0.11249	0.0793499	0.764806	0.945358	1.15983	0.0489525	0.019703
260/2210.3	cpx2 core	50.1777	0.700569	1.15759	0.5264	18.7889	12.301	15.3631	0.201362	7.69231e-06		99.2232			32.3381	36.0221	30.8728	0.766967	53.8581
260/2210.3	STDEV on 13 analyses	0.296047	0.0836311	0.223706	0.0475905	0.704803	0.357349	0.435921	0.0245352	0.0186742
260/2210.3	cpx2 rim points	48.3326	0.55288	0.81152	0.61474	24.307	5.6011	18.6656	0.21574	0.00492		99.1175			40.733	17.0102	41.4049	0.851861	29.0971
260/2210.3	STDEV on 5 analyses	0.300874	0.036978	0.0731439	0.0198422	0.315973	0.379611	0.64955	0.0153388	0.0113603
260/3008.2	cpx1 core	50.1995	1.27492	2.46328	0.17545	10.3064	13.1471	20.875	1.1546	0.00418333		99.6088			42.3418	37.1039	16.3168	4.23751	69.4615
260/3008.2	STDEV on 6 analyses	0.550406	0.161436	0.41252	0.0477364	0.327638	0.163621	0.311481	0.114618	0.0129246
260/3008.2	cpx1 rim	50.2538	1.19213	3.77753	0.0898	6.81923	13.4715	22.6966	1.23093	0.0208667		99.5595			46.3295	38.2596	10.8637	4.54722	77.8875
260/3008.2	STDEV on 3 analyses	0.228522	0.114939	0.403311	0.0399	0.314678	0.198611	0.0611066	0.0239713	0.0059702
260/3008.2	cpx4 core	50.3588	1.21654	2.52663	0.156713	8.88019	14.1269	21.847	0.606888	0.0457875		99.78			44.0952	39.6785	14.0121	2.21419	74.0101
260/3008.2	STDEV on 8 analyses	0.567062	0.147805	0.418356	0.0903211	1.49632	0.386635	0.929693	0.120489	0.0598921
260/3008.2	cpx4 rim	52.0811	0.716283	1.66553	0.0879167	6.4746	14.9446	23.1625	0.7872	-0.00166667		99.9244			45.9218	41.2267	10.0264	2.825	80.4876
260/3008.2	STDEV on 6 analyses	0.462316	0.0465079	0.179504	0.0647151	1.05875	0.310821	0.788612	0.0668453	0.0163603
260/3008.2	cpx2 core	49.4314	1.67866	3.40214	0.11392	9.3754	13.0625	21.8056	0.905332	-0.003756		99.7772			44.5585	37.139	14.9547	3.34784	71.2943
260/3008.2	STDEV on 25 analyses	0.253959	0.117198	0.0974755	0.0280808	0.263028	0.183026	0.23212	0.0393636	0.0206561
260/3008.2	cpx2 intermediate	51.8735	0.865767	1.51365	0.148433	9.0826	14.3647	21.6036	0.7918	0.00251667		100.253			43.1057	39.8814	14.1539	2.85901	73.8525
260/3008.2	STDEV on 6 analyses	0.317157	0.126477	0.175797	0.0392628	1.07252	0.312432	0.626648	0.0375874	0.0177464
260/3008.2	cpx2 rim	50.4084	1.16868	3.7962	0.0429778	6.28896	13.9997	23.9638	0.762144	0.00151111		100.447			48.1821	39.1641	9.875	2.77875	79.8645
260/3008.2	STDEV on 9 analyses	0.725891	0.319398	0.503482	0.0292329	0.395873	0.393733	1.08207	0.395361	0.0172465
260/3008.2	cpx2 core-intermediate	49.7195	1.7316	3.3955	0.1035	9.3735	12.9296	21.7206	0.8336	-0.005		99.8037			44.7518	37.0659	15.0743	3.10803	71.0888
260/3008.2	cpx2 core-intermediate	48.7358	1.7631	3.4863	0.0993	9.2977	12.9401	21.8814	0.8497	-0.0252		99.0408			44.9484	36.9852	14.9078	3.15859	71.2721
260/3008.2	cpx2 core-intermediate	49.3156	1.771	3.4046	0.0851	9.375	13.0835	21.6557	0.8622	0.005		99.5463			44.433	37.3515	15.0142	3.20133	71.3281
260/3008.2	cpx2 core-intermediate	49.5214	1.7357	3.5147	0.1503	9.4497	12.9614	22.1607	0.8812	-0.0034		100.393			45.0735	36.6809	15.0022	3.2434	70.9728
260/3008.2	cpx2 core-intermediate	49.6088	1.7055	3.3918	0.1177	9.4795	12.9134	21.99	0.8814	0.0134		100.114			44.9217	36.7048	15.1152	3.25831	70.8313
260/3008.2	cpx2 core-intermediate	49.2698	1.6864	3.4058	0.1291	9.289	13.0496	22.1368	0.8732	-0.0101		99.8353			45.0625	36.9614	14.7594	3.21665	71.4634
260/3008.2	cpx2 core-intermediate	49.2296	1.6526	3.2609	0.0908	9.4353	13.0448	21.8876	0.854	0.0201		99.4808			44.7158	37.081	15.0459	3.15726	71.1361
260/3008.2	cpx2 core-intermediate	49.4351	1.6609	3.4843	0.1361	9.3785	12.9514	21.9803	0.9246	-0.0369		99.928			44.8629	36.7808	14.9412	3.41505	71.1125
260/3008.2	cpx2 core-intermediate	49.5003	1.6576	3.4914	0.1234	9.4765	13.0179	21.9264	0.9143	0.0285		100.141			44.6649	36.897	15.0677	3.37037	71.004
260/3008.2	cpx2 core-intermediate	49.3368	1.6019	3.4574	0.1334	9.0061	12.913	21.9995	0.8936	0.0353		99.3825			45.254	36.9592	14.4604	3.32641	71.8777
260/3008.2	cpx2 core-intermediate	48.9702	1.6161	3.3894	0.1391	9.0736	13.0199	22.1184	0.8972	-0.0134		99.2139			45.1947	37.0163	14.4715	3.31751	71.8934
260/3008.2	cpx2 core-intermediate	49.5297	1.64	3.4615	0.0838	8.9582	13.165	21.9305	0.9048	0.0134		99.7067			44.868	37.4765	14.3056	3.34988	72.3735
260/3008.2	cpx2 core-intermediate	49.4158	1.5353	3.3816	0.1319	9.0751	13.181	21.9819	0.899	-0.0286		99.578			44.8315	37.4039	14.4467	3.31792	72.1379
260/3008.2	cpx2 core-intermediate	49.1709	1.5546	3.3031	0.0539	9.2467	13.3742	21.9817	0.8594	-0.0067		99.5514			44.5306	37.6978	14.6212	3.15051	72.0538
260/3008.2	cpx2 core-intermediate	49.6404	1.5871	3.2729	0.0738	9.1658	13.2977	21.553	0.9115	-0.0151		99.4942			44.1125	37.8688	14.6427	3.37598	72.1152
260/3008.2	cpx2 core-intermediate	49.2844	1.5796	3.327	0.0851	9.0897	13.3666	21.6899	0.9504	0.0118		99.3983			44.1723	37.876	14.4491	3.50258	72.3859
260/3008.2	cpx2 core-intermediate	49.6068	1.5076	3.4819	0.1163	9.2729	13.0845	21.9018	0.9777	-0.0151		99.9324			44.5931	37.0678	14.7368	3.60232	71.5531
260/3008.2	cpx2 core-intermediate	50.0674	1.5422	3.3906	0.1235	9.2478	13.2644	21.8837	0.9448	-0.0302		100.433			44.4179	37.4606	14.6512	3.47029	71.8851
260/3008.2	cpx2 core-intermediate	49.4089	1.507	3.423	0.1121	9.3738	13.3971	21.6946	0.9274	0.0084		99.8581			43.9783	37.7876	14.832	3.40207	71.8127
260/3008.2	cpx2 core-intermediate	49.432	1.7944	3.3823	0.0865	9.3726	13.1248	21.5042	0.9409	0.0118		99.6464			44.0801	37.4337	14.9961	3.49021	71.3978
260/3008.2	cpx2 intermediate-rim	49.4486	2.0011	3.6984	0.1219	9.5427	13.0287	21.5363	0.9554	-0.0117		100.327			44.094	37.1159	15.2503	3.53983	70.8776
260/3008.2	cpx2 intermediate-rim	49.4617	1.7557	3.3716	0.0879	9.8084	13.0132	21.6187	0.8923	-0.0436		99.9617			44.1235	36.9552	15.6256	3.29564	70.2827
260/3008.2	cpx2 intermediate-rim	49.4943	1.7893	3.2575	0.1517	9.7519	13.0415	21.6505	0.8945	0.0218		100.053			44.1604	37.0121	15.5258	3.30168	70.4484
260/3008.2	cpx2 intermediate-rim	49.5822	1.8063	3.3	0.1446	9.9093	12.7534	21.2559	0.9785	0		99.7308			43.8209	36.5829	15.9457	3.65049	69.6438
260/3008.2	cpx2 intermediate-rim	49.5989	1.784	3.32	0.1672	9.9356	12.6462	21.4998	0.9317	-0.0184		99.8796			44.2958	36.2526	15.9779	3.4737	69.4088
260/3008.2	cpx2 intermediate-rim	51.6625	0.9717	1.6666	0.1292	9.6145	14.2825	21.5447	0.7466	-0.0269		100.624			42.8555	39.5295	14.9276	2.68746	72.5883
260/3008.2	cpx2 intermediate-rim	51.6283	0.9845	1.5558	0.1618	9.5212	14.1254	21.3056	0.7746	0.0252		100.087			42.7883	39.4714	14.9252	2.81512	72.5622
260/3008.2	cpx2 intermediate-rim	51.5702	0.9341	1.4351	0.0922	9.6145	14.2046	21.1248	0.7629	0.0034		99.7478			42.4413	39.7078	15.0772	2.77366	72.4793
260/3008.2	cpx2 intermediate-rim	52.154	0.8536	1.387	0.1945	9.4917	14.1702	21.2065	0.8112	0.0151		100.282			42.5837	39.5915	14.8771	2.94776	72.6869
260/3008.2	cpx2 intermediate-rim	51.8754	0.7975	1.2873	0.186	9.3514	14.4457	21.6182	0.8062	0.0017		100.364			42.8287	39.8203	14.4607	2.89032	73.3595
260/3008.2	cpx2 intermediate-rim	52.3506	0.6532	1.7501	0.1269	6.9023	14.9597	22.8218	0.8493	-0.0034		100.415			45.137	41.1677	10.6555	3.03972	79.4387
260/3008.2	cpx2 intermediate-rim	50.6071	1.2416	3.8717	0.067	6.3669	13.8324	23.3012	1.0416	-0.0237		100.356			47.1664	38.9586	10.0596	3.81544	79.4778
260/3008.2	cpx2 intermediate-rim	51.3385	1.12	3.3325	0.0457	6.4518	14.3618	22.7107	1.082	0.0136		100.458			45.707	40.2172	10.1352	3.94065	79.8715
260/3008.2	cpx2 intermediate-rim	50.8509	1.2845	3.5201	0.0885	6.467	14.1659	23.146	1.1449	-0.0068		100.666			46.3142	39.4397	10.1004	4.14567	79.6116
260/3008.2	cpx2 intermediate-rim	50.0109	1.4748	4.0808	0.0428	6.5961	13.818	23.022	1.1197	-0.0102		100.174			46.5814	38.9015	10.4173	4.09978	78.8776
260/3008.2	cpx2 intermediate-rim	50.9455	1.0759	3.488	0.0043	6.551	13.9166	23.3172	1.0246	0		100.331			46.9648	39.0014	10.2992	3.73456	79.1094
260/3008.2	cpx2 intermediate-rim	48.7947	1.7507	4.9243	0.0014	6.6839	13.1208	24.3443	0.5965	0.0271		100.261			49.7868	37.3361	10.6695	2.20758	77.7744
260/3008.2	cpx2 intermediate-rim	50.2812	1.0308	4.0204	0.0257	5.8306	14.3546	25.3275	0.2395	0.0068		101.12			50.368	39.7196	9.05053	0.8619	81.4425
260/3008.2	cpx2 intermediate-rim	50.2687	0.8618	3.5396	0.0686	5.4854	14.3222	25.4204	0.2391	0.0221		100.249			50.7773	39.8059	8.55251	0.864282	82.3143
260/3008.2	cpx2 intermediate-rim	50.578	0.678	3.3884	0.0428	6.1679	14.1052	25.0853	0.3714	-0.0153		100.405			49.9731	39.0973	9.59074	1.3389	80.3016
260/3025-3030	cpx in groundmass	47.5446	2.3548	3.7015	0.391	16.1669	9.6839	18.8943	0.8971	0.0445		99.6888			40.5363	28.9077	27.0731	3.48291	51.6386
260/3025-3030	cpx in groundmass	46.5592	2.1343	6.498	0.3451	12.9365	12.7648	17.2132	0.4413	0.0366		98.9467			37.5259	38.7199	22.0133	1.74097	63.7541
260/3025-3030	cpx in groundmass	46.3758	2.2892	8.2072	0.2993	11.3288	13.0476	17.6099	0.4292	0.0618		99.6481			38.8023	40.0021	19.4842	1.71139	67.2459
260/3025-3030	cpx 1	52.1716	0.5851	1.7381	0.31045	10.3179	12.6989	21.6654	0.95585	-0.00585		100.462			44.1076	35.9731	16.3973	3.52201	68.6925
260/3025-3030	STDEV on 2 analyses	0.0881762	0.10352	0.163625	0.00388909	0.245932	0.0285671	0.441871	0.057912	0.0437699
260/3025-3030	cpx 2	48.6011	1.5286	4.5903	0.256	10.8334	14.1141	18.6759	0.3959	0.3304		99.3646			39.3288	41.3555	17.8071	1.5087	69.9015
260/3025-3030	opx in groundmass	54.0921	0.0531	0.8413	1.2444	18.1711	25.9765	0.42	0.0455	-0.0161		100.853			0.826295	71.1078	27.9039	0.161989	71.8176
260-3045-50	homogeneous cpx1	49.482	1.27305	3.18905	0.302025	12.6495	12.8606	19.0654	0.346562	0.120563		99.2954			40.174	37.7024	20.8023	1.32135	64.4469
260-3045-50	STDEV on 8 analyses	0.570702	0.142537	0.290145	0.0322449	0.44688	0.255122	0.377652	0.0272339	0.0410814
260-3045-50	cpx2	48.6479	1.5274	3.7682	0.2861	12.3971	12.996	19.2629	0.3625	0.1302		99.3795			40.4021	37.9265	20.2955	1.37587	65.1411
260-3045-50	cpx2	49.0538	1.3883	3.3202	0.2749	12.3375	12.814	19.3634	0.3311	0.0902		98.9719			40.8322	37.5973	20.307	1.26348	64.93
260-3045-50	cpx2	49.288	1.2898	3.1353	0.3172	12.741	12.8425	19.1049	0.3197	0.07		99.1151			40.2231	37.621	20.9379	1.21804	64.2448
260-3045-50	cpx2	49.3877	1.2253	2.953	0.3198	13.5688	12.7664	19.0177	0.344	0.015		99.5966			39.6248	37.0108	22.0673	1.29705	62.6473
260-3045-50	cpx2	48.7302	1.2969	2.8329	0.3459	14.6793	12.4161	18.1396	0.3374	0.0232		98.8078			38.2017	36.3824	24.1301	1.28585	60.1238
260-3045-50	cpx2	49.0416	1.2583	2.4398	0.4341	16.3644	11.8212	17.1887	0.3602	0.0231		98.9368			36.5238	34.9498	27.1413	1.38505	56.2879
260-3045-50	cpx2	48.675	1.4004	2.6108	0.4223	18.7347	11.4329	15.4075	0.332	0.0033		99.0196			33.1064	34.1812	31.4214	1.29094	52.1034
260-3045-50	cpx2	48.414	1.6052	2.5634	0.4644	18.884	10.8663	16.2964	0.3423	0.0049		99.454			34.84	32.3235	31.5122	1.32429	50.6355
260-3045-50	cpx 3	49.2623	1.2314	3.4275	0.2796	12.5656	12.9092	19.5288	0.3446	0.0532		99.6084			40.751	37.4812	20.4665	1.30127	64.681
260-3045-50	cpx 3	49.1664	1.2261	3.321	0.2895	12.6163	12.7507	19.2085	0.3433	0.0882		99.0067			40.5083	37.4142	20.7674	1.31013	64.3059
260-3045-50	cpx 3	49.3121	1.1656	2.9419	0.3221	12.8204	12.6927	19.2847	0.3184	0.0366		98.9036			40.5751	37.158	21.0546	1.2123	63.8315
260-3045-50	cpx 3	48.98	1.2756	2.9834	0.3669	13.5247	12.7604	19.0385	0.3774	0.0697		99.3919			39.6364	36.9638	21.978	1.42184	62.7124
260-3045-50	cpx 3	49.0074	1.2161	2.8814	0.3385	13.9662	12.5402	18.5598	0.3331	0.058		98.9014			39.0632	36.724	22.9441	1.2687	61.5471
260-3045-50	cpx 3	48.9951	1.3065	2.6604	0.3769	15.6898	11.9103	18.028	0.2956	0.0247		99.281			38.0486	34.9756	25.8468	1.12898	57.5044
260-3045-50	cpx 3	48.6041	1.3644	2.5161	0.3861	16.7695	11.3715	17.2545	0.3397	0.018		98.625			36.8837	33.8221	27.9802	1.31406	54.7263
260-3045-50	cpx 3	48.4653	1.4157	2.2146	0.4777	19.7989	10.6811	15.8264	0.2823	-0.0081		99.1749			33.9238	31.8558	33.1254	1.09502	49.0231
260-3045-50	cpx 3	49.6262	0.217	0.4421	0.6311	23.2738	7.4932	17.6819	0.2477	0.0016		99.6188			37.8446	22.3148	38.8813	0.959377	36.4644
260-3045-50	cpx 3	48.6932	0.1301	0.2463	0.6996	26.1152	5.2046	17.4321	0.2207	-0.0207		98.7353			38.3483	15.9307	44.8424	0.878593	26.2134
274-1800.8	cpx core-rim	51.543	0.583386	2.35831	9.08004	0.262988	16.5571	18.5995	0.235073	0.237633		99.4588			37.841	46.8711	14.4223	0.865655	76.4725
274-1800.8	STDEV on 49 analyses	0.500387	0.0808648	0.423132	0.286936	0.0282731	0.208882	0.288898	0.0259769	0.0514941
274-1800.8	cpx core-rim	52.0848	0.636115	1.63897	10.9498	0.307685	15.869	18.3114	0.250945	0.026065		100.078			37.0761	44.6998	17.3046	0.919528	72.0861
274-1800.8	STDEV on 20 analyses	0.435183	0.0872203	0.458696	0.264324	0.038712	0.395607	0.303926	0.0229749	0.0250503
274-1800.8	cpx core-rim	51.9218	0.663903	2.09442	10.5669	0.292803	15.8688	18.3645	0.252221	0.0505		100.08			37.3658	44.9208	16.7846	0.928778	72.8265
274-1800.8	STDEV on 70 analyses	0.496819	0.0800159	0.36979	0.781901	0.0418234	0.392883	0.833351	0.0246514	0.033981
275/2634.2	cpx groundmass	48.6822	1.7758	3.33124	0.33716	14.1579	12.1273	19.0918	0.41286	0.02666		99.9538			39.9676	35.3279	23.1401	1.5644	60.4809
275/2634.2	STDEV on 5 analyses	0.462523	0.139993	0.69526	0.0643849	1.29578	0.350125	1.30113	0.0269578	0.0469978
275/2634.2	opx groundmass	50.5882	0.1193	0.195867	0.7847	30.8822	13.717	3.50087	0.0586	0.0066		99.8696			7.48245	40.7786	51.5122	0.226745	44.1673
275/2634.2	STDEV on 3 analyses	0.174034	0.0132571	0.0424058	0.0352017	0.987748	0.897755	1.4793	0.0138264	0.028838
275/2634.2	cpx groundmass	48.9785	1.55355	3.14627	0.344475	14.524	12.1197	19.0959	0.320175	0.045975		100.136			39.8813	35.221	23.6883	1.20935	59.8354
275/2634.2	STDEV on 4 analyses	0.253007	0.142719	0.527521	0.0692852	1.86352	0.845883	0.642975	0.0333597	0.0631221
277-280	zoned cpx	52.9701	0.4384	1.9279	0.2368	7.0333	16.6061	21.1667	0.1459	0.0675		100.6			42.3112	46.1871	10.9739	0.527772	80.8018
277-280	zoned cpx	53.3519	0.421	1.6431	0.1713	6.867	16.6168	21.273	0.1779	0.0692		100.585			42.4819	46.1714	10.7039	0.642894	81.1801
277-280	zoned cpx	53.1166	0.4228	1.5889	0.1527	7.2049	16.4967	21.0003	0.1848	0.0674		100.248			42.0747	45.9879	11.2674	0.670018	80.3208
277-280	zoned cpx	53.2413	0.391	1.6685	0.1483	7.4301	16.5274	21.3345	0.1455	0.0371		100.929			42.3358	45.6332	11.5085	0.522489	79.8597
277-280	zoned cpx	53.1431	0.4432	1.5096	0.1639	7.6441	16.652	20.8918	0.212	0.0286		100.689			41.4425	45.9608	11.8357	0.761018	79.5217
277-280	zoned cpx	52.0944	0.472	1.6094	0.1959	9.8723	15.1231	20.1455	0.1766	-0.0134		99.6996			40.9352	42.7574	15.658	0.64938	73.1954
277-280	zoned cpx core	52.9862	0.4314	1.6579	0.17815	7.67528	16.337	20.9686	0.173783	0.0427333		100.458			41.9302	45.4496	11.9912	0.628928	79.1466
277-280	STDEV on 4 analyses	0.455192	0.0270218	0.143065	0.0332974	1.11128	0.597534	0.435932	0.0252356	0.0325722
277-280	zoned cpx rim	51.0315	0.8181	1.4741	0.2675	14.6827	13.0637	18.4466	0.2052	-0.0888		99.9098			38.0694	37.5125	23.6518	0.766347	61.3308
277-280	zoned cpx rim	51.0998	0.8022	1.4754	0.3295	14.252	13.1361	18.4716	0.2105	-0.0675		99.7077			38.2796	37.8774	23.0535	0.789413	62.1645
277-280	zoned cpx rim	51.0446	0.8339	1.452	0.3606	14.3914	13.1222	18.5435	0.2425	0.0181		100.028			38.2548	37.6662	23.1737	0.905305	61.9103
277-280	zoned cpx rim	51.3368	0.8501	1.4709	0.3755	15.1479	13.0115	18.5235	0.2788	-0.0164		100.981			37.8372	36.9806	24.1516	1.03057	60.4928
277-280	zoned cpx rim	51.1282	0.826075	1.4681	0.333275	14.6185	13.0834	18.4963	0.23425	-0.03865		100.156			38.1102	37.5092	23.5077	0.872908	61.4746
277-280	STDEV on 4 analyses	0.142197	0.0205916	0.0108986	0.0478547	0.39593	0.0572725	0.0448994	0.0339643	0.0485214
277-280	cumulitic cpx c-r 1	53.1842	0.3905	1.6013	0.195	6.9803	16.4994	21.0365	0.1369	0.1085	0	100.139			42.3356	46.201	10.9649	0.498568	80.8192
277-280	cumulitic cpx c-r 1	52.9586	0.4381	1.6392	0.1993	7.1177	16.4473	20.9601	0.1654	0.0119	13	99.9324			42.1734	46.0459	11.1785	0.60224	80.4655
277-280	cumulitic cpx c-r 1	52.7069	0.3949	1.6105	0.2522	7.2967	16.6026	20.987	0.1616	0.0288	26	100.038			41.9106	46.1318	11.3736	0.583988	80.2217
277-280	cumulitic cpx c-r 1	53.0603	0.446	1.6079	0.1677	7.4767	16.6974	20.9641	0.1478	0.0389	39	100.619			41.678	46.1881	11.6022	0.531733	79.9237
277-280	cumulitic cpx c-r 1	51.7143	0.6944	1.6415	0.3196	12.3848	14.3574	19.1411	0.2216	0.0117	52	100.485			38.9159	40.615	19.6538	0.815302	67.3897
277-280	cumulitic cpx c-r 2	52.9658	0.4044	1.6313	0.2392	7.5547	16.6672	20.6921	0.1666	-0.0457	0	100.261			41.3172	46.3063	11.7745	0.601991	79.7274
277-280	cumulitic cpx c-r 2	52.6766	0.4815	1.5922	0.2132	7.9915	16.3665	20.5801	0.1884	0.0135	13	100.107			41.217	45.6075	12.4927	0.682809	78.498
277-280	cumulitic cpx c-r 2	52.556	0.4613	1.629	0.2202	8.5121	15.8096	20.7515	0.1862	0.0169	26	100.208			41.7284	44.2337	13.3603	0.677564	76.8026
277-280	cumulitic cpx c-r 2	51.0041	0.8697	1.7285	0.2989	13.8757	13.3331	18.7321	0.2648	0.0497	39	100.169			38.5485	38.1772	22.2882	0.986117	63.1389
277-280	cumulitic cpx c-r 2	50.5103	0.9528	1.7201	0.3295	14.4828	12.9894	18.3387	0.2206	-0.0149	52	99.5346			38.1137	37.5623	23.4943	0.829672	61.5204
277-280	cumulitic cpx c-r 2	50.3775	0.9945	1.758	0.3473	15.3316	12.7293	18.0424	0.2704	0.0181	65	99.8634			37.4244	36.7381	24.8226	1.01498	59.6779
277-280	zoned cpx c-r	53.0642	0.3617	1.6214	0.2237	7.0462	16.6176	20.9159	0.1814	0.0491		100.09			41.9444	46.3679	11.0294	0.6583	80.7841
277-280	zoned cpx c-r	52.6861	0.4214	1.6097	0.1633	7.6657	16.3987	20.8302	0.1644	0.0321		99.9758			41.7203	45.6998	11.9841	0.59586	79.2246
277-280	zoned cpx c-r	51.9731	0.5933	1.5583	0.2464	10.5822	14.8514	19.9029	0.2203	0.067		99.9974			40.432	41.9785	16.7797	0.809864	71.4429
277-280	zoned cpx c-r	50.9722	0.7307	1.3694	0.3738	13.8827	13.2011	18.5387	0.1879	0.0298		99.2934			38.5558	38.2007	22.5363	0.707174	62.8953
277-280	zoned cpx c-r	51.2686	0.6036	1.1321	0.3846	14.7852	12.7639	18.9732	0.1876	0.0281		100.129			39.0292	36.5328	23.7397	0.698346	60.6128
277-280	cumulitic cpx core	52.1049	0.577425	1.59065	0.260869	10.1854	15.1457	19.9617	0.191994	0.0277188		100.053			40.4403	42.6617	16.1922	0.705906	72.6965
277-280	STDEV on 16 analyses	0.986211	0.210846	0.149268	0.0718937	3.31154	1.63251	1.12313	0.0384403	0.0339451
277-280	cumulitic cpx c-r 1	49.2708	0.9812	1.4484	0.5143	21.1063	9.1421	17.3777	0.203	-0.0032		100.049			37.0213	27.0992	35.097	0.782607	43.5705
277-280	cumulitic cpx c-r 2	49.3128	1.0428	1.9545	0.3975	16.1431	12.0348	17.7595	0.2483	-0.0099		98.8993			37.3456	35.2127	26.4969	0.944875	57.062
277-280	zoned cpx c-r	49.1601	1.0104	1.3627	0.5147	20.551	9.1414	17.7704	0.2315	0		99.7464			37.8499	27.0914	34.1664	0.892293	44.2252
277-280	cumulitic cpx c-r 2	49.7055	1.1512	1.7298	0.4699	17.1716	11.4353	17.7358	0.2523	0.0082		99.6631			37.3333	33.4922	28.2134	0.961063	54.2775
277-280	cumulitic cpx rim	49.3623	1.0464	1.62385	0.4741	18.743	10.4384	17.6608	0.233775	-0.001225		99.5895			37.3875	30.7239	30.9934	0.89521	49.7838
277-280	STDEV on 4analyses	0.237693	0.0742586	0.270516	0.0552256	2.45512	1.51711	0.189318	0.0224085	0.00751637
277-300	cpx core	53.0711	0.38835	1.77508	0.178667	6.44633	16.712	21.3419	0.172322	0.0991944		100.189			42.7391	46.5578	10.0788	0.624375	82.2122
277-300	STDEV on 18 analyses	0.355611	0.0659993	0.102951	0.0371993	0.88496	0.639176	0.632825	0.0229402	0.0570336
277-300	cpx rim	52.18	0.419517	1.1401	0.272767	11.3635	13.9334	20.437	0.23755	-0.00948333		99.9915			41.6006	39.4617	18.0622	0.875568	68.5447
277-300	STDEV on 6 analyses	0.625283	0.366854	0.663884	0.0198944	0.88057	1.0379	1.0047	0.049857	0.0090012
277-300	cpx extreme rim	49.8356	1.1775	1.4907	0.4132	16.0737	11.9353	18.5532	0.2512	0.0214		99.7711			38.5235	34.4819	26.0508	0.943876	56.9641
277/495	opx core	53.3408	0.0388455	0.569	0.449782	20.3312	24.6619	0.708164	0.0124636	0.00348182		100.127			1.39079	67.3917	31.1732	0.0443434	68.3727
277/495	STDEV on 11 analyses	0.804645	0.00827567	0.367368	0.0264075	0.182228	0.504399	0.0687628	0.0270859	0.0235113		1.20408			0.13241	0.476786	0.409776	0.0972345	0.427425
277/495	opx rim	51.3907	0.314556	0.790533	0.524756	24.2111	20.8124	1.5039	0.0317333	0.00564444		99.5941			3.04455	58.5924	38.2467	0.116345	60.5015
277/495	STDEV on 9 analyses	0.243919	0.0492705	0.160951	0.0375511	0.674479	0.655466	0.161641	0.0128919	0.0248942
277/440	cpx ophitic homogeneous	50.4247	0.82787	1.43031	0.42468	15.7762	12.3148	18.2411	0.23158	-0.00183		99.6761			37.9193	35.6137	25.5962	0.870871	58.2089
277/440	STDEV on 10 analyses	0.385337	0.0489888	0.185651	0.0332885	0.927109	0.345032	0.986967	0.0300145	0.018283
277/440	cpx 2 rim-rim (dark-bright-dark)	48.9798	0.7726	1.2072	0.5048	20.5099	11.565	14.6552	0.1826	0.0081		98.395			31.1243	34.1747	33.9993	0.701774	50.1286
277/440	cpx 2 rim-rim (dark-bright-dark)	48.8799	0.8224	1.5228	0.4379	18.2633	12.1941	15.7321	0.1695	0.0033		98.0491			33.2877	35.9003	30.163	0.649016	54.3422
277/440	cpx 2 rim-rim (dark-bright-dark)	49.2842	0.8379	1.4713	0.4743	16.7816	12.5167	17.0734	0.1949	-0.0099		98.6665			35.6137	36.3277	27.323	0.735694	57.0735
277/440	cpx 2 rim-rim (dark-bright-dark)	49.4078	0.8099	1.2465	0.4699	17.1531	12.4723	16.7981	0.2217	-0.0099		98.5814			35.0384	36.1977	27.927	0.836832	56.4489
277/440	cpx 2 rim-rim (dark-bright-dark)	49.4728	0.7988	1.229	0.4674	16.6037	12.346	17.6079	0.2165	0.0197		98.7749			36.5781	35.6854	26.9226	0.81388	56.9982
277/440	cpx 2 rim-rim (dark-bright-dark)	49.9194	0.7121	1.1954	0.3788	16.6169	12.0097	18.171	0.1904	-0.0016		99.1791			37.7023	34.6714	26.9114	0.714898	56.3004
277/440	cpx 2 rim-rim (dark-bright-dark)	49.2902	0.4856	0.8748	0.7834	26.2292	14.2407	8.3847	0.0635	-0.0047		100.369			17.1863	40.6141	41.9641	0.235536	49.1826
277/440	cpx 2 rim-rim (dark-bright-dark)	49.2674	0.427	0.4897	0.7511	30.5227	14.5793	2.646	0.0505	-0.0232		98.7123			5.64813	43.3015	50.8553	0.195072	45.9887
277/440	cpx 2 rim-rim (dark-bright-dark)	49.4268	0.4218	0.4511	0.8192	30.0398	14.0958	3.3044	0.0504	-0.0186		98.5766			7.11298	42.2182	50.4725	0.196326	45.5474
277/440	cpx 2 rim-rim (dark-bright-dark)	49.5164	0.4239	0.4343	0.4461	20.5516	8.9821	18.7529	0.1927	-0.013		99.307			39.3632	26.2331	33.6717	0.731968	43.7913
277/440	cpx 2 rim-rim (dark-bright-dark)	49.6445	0.325	0.5149	0.4308	20.4535	8.5663	18.7056	0.1759	-0.0244		98.8189			39.8773	25.4096	34.0345	0.678591	42.7454
277/440	cpx	50.5733	0.7223	0.8627	0.5289	20.2495	9.9793	17.3741	0.1731	-0.0049		100.463			36.6711	29.3071	33.3606	0.661162	46.7658
277/440	cpx in melt pocket ?	49.4673	0.1973	0.6471	0.3404	20.266	7.9017	19.6015	0.1138	-0.0227		99.084			42.0449	23.5828	33.9305	0.441728	41.0041
277/440	cpx in melt pocket ?	49.1614	0.7464	0.4374	0.428	22.4832	7.4827	18.5599	0.1773	0.0081		99.5445			39.6229	22.227	37.4651	0.684965	37.236
277/440	cpx	49.3347	0.6865	0.9913	0.5758	21.6069	12.8796	13.4783	0.1017	-0.0145		99.6459			37.6527	34.9059	26.7567	0.379868	56.6079
277/440	cpx	50.946	0.8484	1.4338	0.3746	14.9122	12.6535	19.3704	0.2422	-0.0033		100.79			39.4876	35.8909	23.7281	0.893481	60.2004
277/440	cpx	49.6553	0.8818	1.3755	0.4793	15.4968	11.6582	19.249	0.2265	0.0132		99.029			40.1221	33.811	25.2125	0.854344	57.284
277/440	cpx	49.833	0.8207	1.1786	0.5492	18.7681	11.7389	15.666	0.1707	-0.0016		98.7384			33.3619	34.7833	31.1969	0.657832	52.7178
	cpx rim	49.9422	0.80935	1.2448	0.494725	17.696	12.2325	16.9409	0.185275	-0.00155		99.5509			37.6561	34.8478	26.7236	0.696381	56.7025
	STDEV on 6 analyses	0.700216	0.0856249	0.201203	0.0898306	3.11076	0.624351	2.87777	0.063606	0.0113773
277-515	opx surrounding ol	52.2086	0.313625	0.712875	0.575825	23.3458	19.4352	3.21028	0.030775	-0.0036		99.8383			6.59415	55.7323	37.5594	0.114084	59.7676
277-515	STDEV on 4 analyses	0.431246	0.0330236	0.125127	0.04113	1.52725	0.74259	2.42109	0.0364064	0.0156126
277-515	cpx grain 1 core points	51.2812	0.7033	1.3497	0.3872	13.4485	14.1252	17.6733	0.1809	0.0083		99.1659			36.7035	40.8164	21.8003	0.679856	65.1846
277-515	cpx grain 1 core points	51.2671	0.6672	1.9946	0.3626	11.7636	13.3533	18.6679	0.2703	-0.0217		98.3494			39.7877	39.5998	19.57	1.04253	66.9256
277-515	cpx grain 1 core points	51.4562	0.7206	1.3422	0.3147	13.7065	14.079	17.4269	0.1964	0.0066		99.249			36.2529	40.7517	22.256	0.739355	64.6773
277-515	cpx grain 1 core-rim	51.4891	0.8355	1.6924	0.3891	12.9032	14.0862	17.8837	0.2006	-0.0116		99.4726			37.3217	40.9024	21.0184	0.757571	66.056
277-515	cpx grain 1 core-rim	51.0825	0.7911	1.5082	0.402	14.5661	14.4483	16.5744	0.254	-0.0083		99.6027			34.1692	41.4443	23.439	0.947587	63.8752
277-515	cpx grain 1 core-rim	51.7431	0.8023	1.4939	0.4394	15.7402	14.5708	16.0325	0.1951	0.023		101.057			32.756	41.4213	25.1014	0.721332	62.2664
277-515	cpx grain 1 core-rim	50.7127	0.8619	1.5718	0.4027	13.7329	13.9821	17.4914	0.2251	-0.0149		98.9822			36.3854	40.4693	22.2979	0.847358	64.4753
277-515	cpx grain 1 core-rim	51.0958	0.2989	1.217	0.7439	25.23	18.7168	1.8159	0.0225	0		99.1491			3.81554	54.72	41.3789	0.0855529	56.9413
277-515	cpx grain 1 core-rim	52.3757	0.402	0.7315	0.5807	23.5104	18.4679	3.9155	0.033	0.0127		100.028			8.1535	53.5088	38.2134	0.124354	58.3379
277-515	zoned interstitial cpx dark to bright	51.8808	0.3094	0.9707	0.5886	23.8687	20.1229	1.7637	0	-0.0047		99.4992			3.64452	57.8571	38.4984	0	60.0455
277-515	zoned interstitial cpx dark to bright	52.7935	0.196	0.5781	0.5445	23.6013	21.0748	0.9342	-0.0079	-0.0111		99.7085			1.91965	60.2554	37.8543	-0.0293763	61.4163
277-515	zoned interstitial cpx dark to bright	53.0095	0.0165	0.7716	0.5525	23.9118	20.8572	0.5154	-0.0097	0.0016		99.6291			1.06968	60.2304	38.7364	-0.0364308	60.8592
277-515	zoned interstitial cpx dark to bright	52.4693	0.0133	1.1648	0.5733	23.92	21.2268	0.432	-0.0203	0.0032		99.78			0.888874	60.7704	38.4163	-0.075586	61.2687
277-515	zoned interstitial cpx dark to bright	50.4778	0.0239	0.7189	0.7378	30.2188	16.2851	0.3908	-0.0047	0.0092		98.8599			0.838114	48.5948	50.5853	-0.0182404	48.9965
277-515	opx interstitial	52.7914	0.3074	0.4926	0.5406	23.4479	20.9252	1.5295	-0.0044	0		100.039			3.12532	59.493	37.3979	-0.01627	61.402
277-515	opx interstitial	51.7337	0.2607	0.5234	0.6354	23.2156	20.9301	1.8705	0.0071	-0.0063		99.1809			3.80754	59.2801	36.8863	0.0261537	61.6433
277-515	opx interstitial	52.5454	0.2694	0.7061	0.5384	24.1592	20.9692	1.1462	0.0329	0.0253		100.398			2.3278	59.2541	38.2972	0.120912	60.7415
277-515	opx interstitial	52.3568	0.279167	0.574033	0.571467	23.6076	20.9415	1.5154	0.0118667	0.00633333		99.8727			3.08689	59.3424	37.5271	0.0435987	61.2623
277-515	STDEV on 3 analyses	0.553489	0.0248347	0.115405	0.0553788	0.491646	0.0241137	0.362356	0.0191014	0.0167249
277 2380-85	opx in grain 2 rim	51.9547	0.6317	1.0604	0.4253	15.9328	18.8072	10.006	0.1277	0.041		98.9942			20.4866	53.5778	25.4625	0.47314	67.7855
277 2380-85	opx in grain 2 rim	52.0657	0.6792	0.97	0.5011	20.9757	22.0436	2.1883	0.0477	-0.04		99.4232			4.43708	62.1904	33.1975	0.175024	65.1974
277 2380-85	opx in grain 2 rim	51.7434	0.5836	0.8593	0.5146	21.5492	22.6768	1.4685	-0.0122	0.0223		99.4127			2.94767	63.3341	33.7625	-0.0443153	65.2279
277 2380-85	opx in grain 2 core	52.7183	0.4669	0.9279	0.473	21.0621	22.0085	1.6912	0.013	0.0176		99.3773			3.46719	62.7804	33.7041	0.0482298	65.0679
277 2380-85	opx in grain 2 core	51.4913	0.64	1.4506	0.3354	10.4587	14.4688	20.9611	0.2765	0.0487		100.124			42.1271	40.4605	16.4068	1.00561	71.149
277 2380-85	opx in grain 2 core	50.6089	0.8595	1.6851	0.3573	11.7154	13.928	19.4114	0.3045	0.0167		98.9106			40.0349	39.9688	18.8598	1.13647	67.9411
277 2380-85	cpx	51.3864	0.96214	2.22523	0.27512	10.5062	15.3086	18.6732	0.27235	0.04399		99.6521			38.3752	43.7637	16.8483	1.01273	72.2414
277 2380-85	STDEV on 10 analyses	0.383436	0.0385397	0.097927	0.0392861	0.89158	0.560908	1.248	0.0383684	0.0164568
277 2380-85	ophitic cpx homogeneous	51.7417	0.883647	2.20432	0.260682	10.1155	15.3211	19.0271	0.267529	0.0741824		99.6213			39.0522	43.7479	16.2063	0.99364	73.002
277 2380-85	STDEV on 6 analyses	0.222009	0.103916	0.154026	0.0490821	1.01259	0.57427	1.04456	0.0329569	0.0529934
277-2420.6	cpx ophitic homogeneous	52.1845	0.659059	1.64874	0.282447	10.4109	15.8565	18.8007	0.265947	0.0556059		100.169			38.0037	44.5979	16.4256	0.972824	73.0891
277-2420.6	STDEV on 17 analyses	0.217658	0.0321831	0.0597537	0.034169	0.444056	0.172055	0.359587	0.0246188	0.0336659
277 2945-2950	patchy cpx1 homogeneous	51.2983	0.74546	1.86888	0.36473	13.6554	13.7073	18.0026	0.24213	0.00206		99.8838			37.3676	39.5799	22.1435	0.909102	64.1433
277 2945-2950	STDEV on 10 analyses	0.433028	0.0557111	0.169122	0.0354176	1.45017	0.885942	0.788768	0.0235989	0.022438
277 2945-2950	patchy cpx4 homogeneous	50.9916	0.7844	1.82245	0.410675	14.7298	13.2191	17.4469	0.222375	-0.005775		99.6371			36.5483	38.5137	24.0954	0.842597	61.5111
277 2945-2950	STDEV on 4 analyses	0.3186	0.118573	0.0639267	0.0264908	1.17266	0.865763	0.156676	0.0269084	0.0209808
FELDSPARS		SiO2	Al2O3	FeO	CaO	Na2O	K2O		Total		Or %	Ab %	An %
		wt.%	wt.%	wt.%	wt.%	wt.%	wt.%		wt.%
219-1440-45	homogeneous plg rim to core	52.0538	29.1671	0.737571	12.8259	4.17863	0.373714		99.398		2.13828	36.2992	61.5625
219-1440-45	STDEV on 7 analyses	0.384515	0.205848	0.346599	0.345123	0.121714	0.167029
219/1710-15	r to r glomeroporphyritic plag	49.1135	31.0721	0.8501	15.5275	3.0128	0.0055		99.5967		0.0312056	25.9793	73.9895
219/1710-15	r to r glomeroporphyritic plag	47.6742	32.2276	0.6816	16.7461	2.291	0.0097		99.5688		0.0552527	19.8333	80.1115
219/1710-15	r to r glomeroporphyritic plag	48.688	30.8803	0.5209	15.232	3.0126	0.0286		98.3758		0.164371	26.3141	73.5216
219/1710-15	r to r glomeroporphyritic plag	48.6458	31.0625	0.4776	15.142	2.9604	0.1975		98.5824		1.13417	25.8374	73.0285
219/1710-15	r to r glomeroporphyritic plag	47.4407	32.3639	0.7073	16.333	2.3286	0.0152		99.1908		0.0880067	20.4906	79.4214
219-1440-45	homogeneous plg rim to core	40.3245	26.302	0.59735	13.221	2.28785	0.0705881		82.6164		0.405503	19.9135	63.5638
219-1440-45	STDEV on 7 analyses	19.577	12.8004	0.18228	6.33961	1.11328	0.0873866
219/1710-15	c-r big plg phenocryst	47.0977	32.4471	0.4093	16.8513	2.1472	0.0608		99.0267		0.347894	18.6725	80.9796
219/1710-15	c-r big plg phenocryst	47.4342	32.555	0.3683	16.5336	2.1767	0.0567		99.1046		0.328686	19.1772	80.4942
219/1710-15	c-r big plg phenocryst	47.7528	32.1651	0.4549	16.8476	2.2531	0.0511		99.5708		0.289933	19.4288	80.2813
219/1710-15	c-r big plg phenocryst	47.7198	31.9176	0.451	16.3818	2.3408	0.0426		98.8492		0.245415	20.4948	79.2598
219/1710-15	c-r big plg phenocryst	48.0065	31.6366	0.4058	16.143	2.4889	0.0561		98.7434		0.322481	21.7439	77.9336
219/1710-15	c-r big plg phenocryst	47.5975	31.7464	0.3605	15.9227	2.5406	0.0811		98.2157		0.468382	22.2999	77.2317
219/1710-15	c-r big plg phenocryst	48.3757	31.678	0.4532	15.9206	2.6167	0.0726		99.1234		0.416755	22.829	76.7543
219/1710-15	c-r big plg phenocryst	48.279	32.332	0.4806	16.3485	2.3778	0.0896		99.9427		0.51395	20.7289	78.7572
219/1710-15	c-r big plg phenocryst	48.9068	31.4649	0.4394	15.8087	2.7995	0.0995		99.554		0.564345	24.1318	75.3038
219/1710-15	c-r big plg phenocryst	48.4843	31.3032	0.3508	15.7927	2.6552	0.0818		98.7141		0.47064	23.2178	76.3116
219/1710-15	c-r big plg phenocryst	47.835	32.0234	0.4157	16.5199	2.3504	0.0622		99.1998		0.355256	20.4024	79.2424
219/1710-15	c-r big plg phenocryst	47.1398	32.3533	0.412	17.2404	2.086	0.0509		99.2737		0.287563	17.9109	81.8015
219/1710-15	c-r big plg phenocryst	47.5227	32.1756	0.4378	16.6485	2.2143	0.0601		99.0306		0.345252	19.3324	80.3223
219/1710-15	c-r big plg phenocryst	48.0622	32.2166	0.4162	16.6672	2.3968	0.0729		99.8296		0.411552	20.5644	79.024
219/1710-15	c-r big plg phenocryst	47.8058	31.9709	0.426	16.2991	2.3299	0.0705		98.9593		0.407509	20.4679	79.1246
219/1710-15	c-r big plg phenocryst	47.9946	31.7373	0.4477	16.2845	2.5532	0.0553		99.0616		0.313988	22.0324	77.6536
219/1710-15	c-r big plg phenocryst	48.2985	31.8595	0.3987	16.1199	2.5048	0.0632		99.2885		0.363047	21.8679	77.7691
219/1710-15	c-r big plg phenocryst	48.7532	31.6407	0.489	16.0347	2.5423	0.0584		99.4701		0.335847	22.22	77.4442
219/1710-15	c-r big plg phenocryst	47.9682	32.066	0.4752	16.2903	2.4358	0.0814		99.273		0.466084	21.1967	78.3372
219/1710-15	c-r big plg phenocryst	48.6174	31.3915	0.4242	15.899	2.591	0.0742		99.0127		0.427303	22.6771	76.8956
219/1710-15	c-r big plg phenocryst	48.5309	31.5774	0.3829	15.9861	2.729	0.0797		99.2903		0.451479	23.4947	76.0538
219/1710-15	c-r big plg phenocryst	48.1619	32.0547	0.4418	16.4894	2.3123	0.0741		99.5277		0.424961	20.1541	79.4209
219/1710-15	c-r big plg phenocryst	47.9209	32.5114	0.3868	16.2197	2.3243	0.0583		99.428		0.338701	20.5224	79.1389
219/1710-15	c-r big plg phenocryst	49.312	31.835	0.4067	15.6151	2.7296	0.0658		99.986		0.379721	23.9401	75.6802
219/1710-15	c-r big plg phenocryst	47.762	32.1188	0.4496	16.6756	2.3994	0.0698		99.5191		0.393875	20.5776	79.0286
219/1710-15	c-r big plg phenocryst	48.0518	32.1037	0.4909	16.203	2.3974	0.0517		99.2655		0.298787	21.0572	78.6441
219/1710-15	c-r big plg phenocryst	48.8536	31.792	0.481	15.9621	2.686	0.0857		99.9152		0.487664	23.2292	76.2832
219/1710-15	c-r big plg phenocryst	49.6998	30.9527	0.4263	15.0444	2.9828	0.0664		99.1571		0.385271	26.3033	73.3115
219/1710-15	c-r big plg phenocryst	50.659	30.6688	0.5049	14.7062	3.3434	0.0964		99.994		0.549957	28.9886	70.4614
219/1710-15	c-r big plg phenocryst	50.3462	30.957	0.4715	14.6966	3.1395	0.1232		99.7428		0.714721	27.6805	71.6048
219/1710-15	c-r big plg phenocryst	49.4892	30.9724	0.4283	15.3822	2.9664	0.0877		99.3174		0.500722	25.7404	73.7589
219/1710-15	c-r big plg phenocryst	48.0331	32.2785	0.4397	16.6121	2.3949	0.065		99.8868		0.368139	20.6146	79.0173
219/1710-15	c-r big plg phenocryst	48.9149	31.5578	0.4849	15.8491	2.6223	0.0645		99.4979		0.371529	22.9564	76.6721
219/1710-15	c-r big plg phenocryst	49.072	31.4537	0.436	15.7211	2.6372	0.0627		99.3805		0.362973	23.2027	76.4344
219/1710-15	c-r big plg phenocryst	47.8577	32.0364	0.4751	16.4281	2.3444	0.1111		99.2483		0.635904	20.3938	78.9703
219/1710-15	c-r big plg phenocryst	47.3966	33.0044	0.5868	16.5451	2.1793	0.0826		99.7575		0.477732	19.1562	80.3661
219/1710-15	plg in grundmass	52.0266	29.1267	1.1788	13.1714	4.2674	0.204		99.9749		1.1492	36.5355	62.3153
219/1710-15	plg in grundmass	52.2028	29.6891	0.9169	13.4999	4.0797	0.1999		100.602		1.12695	34.955	63.918
219/1710-15	plg in grundmass	54.4411	26.5853	1.7292	10.8173	5.2155	0.6483		99.4323		3.67107	44.8849	51.444
219/1951.6	plagioclase	51.8698	28.4749	0.7676	13.2108	4.1992	0.0491		98.6279		0.280154	36.4141	63.3058
219/1951.6	core to rim plg	52.1882	29.1956	0.7579	12.6455	4.0047	0.1171		98.9832		0.696041	36.1773	63.1267
219/1951.6	core to rim plg	56.3925	26.5889	0.7208	9.6669	5.9719	0.2588		99.6495		1.48279	52.0014	46.5158
219/1951.6	core to rim plg	59.5726	24.645	0.5447	7.0234	7.2548	0.2376		99.4132		1.38445	64.2457	34.3698
219/1952.8B	plag at the contact	59.8084	24.7228	0.2451	6.7526	8.0662	0.1076		99.6757		0.596525	67.9632	31.4403
219/1952.8B	plag at the contact	61.9645	23.4216	0.2892	4.6879	9.2337	0.1268		99.732		0.700656	77.5442	21.7552
219/1952.8B	plag at the contact	58.2278	25.5082	0.4006	8.0101	7.5901	0.0856		99.8162		0.466528	62.8694	36.6641
219/1952.8B	plag at the contact	60.7886	24.2239	0.2611	6.0281	8.5491	0.1074		99.9685		0.591311	71.5352	27.8735
219/1952.8B	plag at the contact	60.4699	24.125	0.2071	5.9289	8.8222	0.097		99.6252		0.524767	72.537	26.9382
219/1952.8B	plg undercooled phase (core)	56.6823	28.1802	1.0647	10.4958	6.5898	0.1093		103.145		0.577105	52.8804	46.5425
219/1952.8B	plg undercooled phase (rim)	63.7359	21.4703	0.7624	3.1343	10.1753	0.1858		99.4639		1.01627	84.5857	14.398
219/1952.8B	plg undercooled phase (core)	53.553	27.8364	1.2015	11.3591	5.4693	0.0647		99.4984		0.361113	46.3936	53.2453
219/1952.8B	plg undercooled phase (rim)	64.4459	21.0203	0.7123	2.4444	10.646	0.1559		99.3981		0.847805	87.9882	11.164
219/1952.8B	dark plg quench phase	59.1694	25.0525	0.7094	7.2064	7.9228	0.1946		100.272		1.06409	65.8417	33.0942
219/1952.8B	dark plg quench phase	63.679	22.2512	0.2401	3.6753	9.8217	0.1006		99.7658		0.555361	82.4047	17.04
219/1952.8B	patchy plag	52.5304	28.5488	1.4171	11.9755	4.8936	0.0406		99.4101		0.231531	42.413	57.3555
219/1952.8B	patchy plag (albitized area)	63.4843	22.6805	0.2055	3.8312	10.0213	0.0889		100.363		0.479583	82.1626	17.3579
219/1952.8B	patchy plag (k feld patch)	64.198	18.996	0.3066	-0.0093	0.091	16.279		99.8552		99.2048	0.842819	-0.0475978
219/1952.8B	patchy plag (k feld patch)	59.4348	22.5889	0.446	4.4244	0.9749	11.9211		99.7798		69.6384	8.65527	21.7063
219/1973.5A	plg1 c-r	53.1973	28.9897	0.4777	12.3773	4.4199	0.1958		99.7074		1.13126	38.8104	60.0583
219/1973.5A	plg1 c-r	52.7631	29.1674	0.739	13.2446	4.1082	0.2021		100.284		1.15031	35.5376	63.3121
219/1973.5A	plg1 c-r	52.8076	29.0437	0.7102	12.5397	4.3196	0.2005		99.7224		1.15917	37.9546	60.8862
219/1973.5A	plg1 c-r	53.413	29.0241	0.5865	12.509	4.5039	0.162		100.268		0.925045	39.0863	59.9887
219/1973.5A	plg1 c-r	53.2789	28.879	0.7167	12.285	4.4289	0.1887		99.8575		1.09472	39.0495	59.8558
219/1973.5A	plg1 c-r	53.7382	28.5494	0.7015	12.017	4.7639	0.2079		100.046		1.18526	41.277	57.5377
219/1973.5A	plg1 c-r	55.1768	27.7429	0.727	10.9632	5.3602	0.2311		100.305		1.31419	46.3263	52.3595
219/1973.5A	plg1 c-r	56.0704	27.0736	0.626	10.0923	5.7012	0.2563		99.8888		1.47324	49.8058	48.7209
219/1973.5A	plg1 c-r	56.8503	26.9875	0.6174	9.2482	6.018	0.3457		100.16		2.00302	52.9939	45.0031
219/1973.5A	plg1 c-r	59.0905	25.2555	0.5202	7.4906	6.9705	0.4085		99.8077		2.36219	61.2598	36.378
219/1973.5A	homogeneous plg2	52.6451	29.3411	0.882983	12.9763	4.20787	0.172883		100.289		0.989773	36.6095	62.4007
219/1973.5A	STDEV on 6 analyses	0.320144	0.293759	0.146797	0.306977	0.196135	0.0258498
219/1973.5A	plg3 c-r	53.4335	28.5344	0.6207	12.1524	4.5526	0.2369		99.5905		1.36447	39.8516	58.784
219/1973.5A	plg3 c-r	53.6553	28.7151	0.6725	12.1702	4.5389	0.2548		100.067		1.46655	39.7041	58.8293
219/1973.5A	plg3 c-r	54.4523	28.1194	0.8581	11.679	4.8053	0.255		100.258		1.46833	42.0525	56.4792
219/1973.5A	plg3 c-r	55.3422	27.6385	0.6703	10.9258	5.0304	0.2854		100.009		1.66836	44.6917	53.64
219/1973.5A	plg3 c-r	56.0684	27.3564	0.6184	10.5255	5.4991	0.3084		100.496		1.76171	47.7418	50.4965
219/1973.5A	plg3 c-r	56.0021	27.1388	0.6198	10.285	5.4877	0.3365		99.9253		1.94345	48.169	49.8876
219/1973.5A	plg3 c-r	56.251	27.041	0.5388	10.0601	5.7258	0.3331		99.983		1.90516	49.7714	48.3234
219/1973.5A	plg3 c-r	56.7254	26.8754	0.5605	9.8568	5.861	0.3393		100.276		1.93608	50.8277	47.2363
219/1973.5A	plg3 c-r	56.5753	26.8082	0.6513	9.5313	5.9747	0.367		100.008		2.10289	52.03	45.8671
219/1973.5A	plg3 c-r	57.2418	26.7467	0.4746	9.2963	6.1529	0.3466		100.308		1.97998	53.4194	44.6006
219/1973.5A	plg3 c-r	57.4744	26.121	0.4808	9.1736	6.3483	0.3738		99.998		2.10872	54.4284	43.4629
219/1973.5A	plg3 c-r	58.4568	25.8834	0.5039	8.0901	6.7908	0.307		100.082		1.76213	59.239	38.9989
219/1973.5A	plg3	55.9732	26.4869	0.53422	9.18962	6.22554	0.34674		100.135		1.97796	53.9889	44.0331
219/1973.5A	homogeneous plg2	52.6451	29.3411	0.882983	12.9763	4.20787	0.172883		100.289		0.989773	36.6095	62.4007
219/1973.5A	STDEV on 6 analyses	0.320144	0.293759	0.146797	0.306977	0.196135	0.0258498
219/1973.9	homogeneous plg3	52.6171	29.2923	0.75586	13.146	4.12126	0.19648		100.21		1.12264	35.7898	63.0875
219/1973.9	STDEV on 8 analyses	0.330764	0.219292	0.0849833	0.34821	0.181255	0.0233092
219/1973.9	plg1 core	54.1299	27.8821	0.71575	11.2263	5.16035	0.257975		99.4292		1.47238	44.7428	53.7848
219/1973.9	STDEV on 4 analyses	0.933129	0.497489	0.0695657	0.779407	0.397662	0.0381093
219/1973.9	plg1 rim	59.658	24.5907	0.4319	6.93353	7.42883	0.576933		99.665		3.26062	63.8087	32.9307
219/1973.9	STDEV on 3 analyses	0.814969	0.491461	0.0287026	0.748784	0.449007	0.0518508
219/1973.9	homogeneous plg5	56.2355	26.6942	0.623933	10.0479	5.8782	0.328733		99.9049		1.85593	50.4666	47.6774
219/1973.9	STDEV on 3 analyses	0.325089	0.0693533	0.0358476	0.093421	0.126725	0.0316358
219/1973.9	plg2 core-rim	53.4941	28.6781	0.6536	12.4759	4.6596	0.2314		100.269		1.30066	39.8051	58.8943
219/1973.9	plg2 core-rim	53.1844	29.0012	0.6523	12.3442	4.3817	0.2011		99.8347		1.16731	38.6549	60.1778
219/1973.9	plg2 core-rim	53.6584	28.4651	0.6523	12.0868	4.6924	0.2265		99.8277		1.29362	40.7305	57.9759
219/1973.9	plg2 core-rim	53.6868	28.2833	0.6232	12.006	4.6648	0.2331		99.5787		1.3392	40.731	57.9298
219/1973.9	plg2 core-rim	54.2326	28.661	0.7315	11.8083	4.8718	0.2175		100.575		1.24011	42.216	56.5439
219/1973.9	plg2 core-rim	54.1479	28.2385	0.6659	12.0309	4.6432	0.227		100.025		1.30551	40.5844	58.1101
219/1973.9	plg2 core-rim	56.1749	27.3718	0.5625	10.0071	4.7924	1.1377		100.14		6.76171	43.2882	49.9501
219/1973.9	plg2 core-rim	55.6277	27.3475	0.5931	10.6323	5.3723	0.3039		99.9793		1.74673	46.9292	51.3241
219/1973.9	plg2 core-rim	55.7957	27.3432	0.5358	10.6431	5.5358	0.3108		100.216		1.75964	47.6334	50.607
219/1973.9	plg2 core-rim	55.8664	27.1296	0.6126	10.3273	5.7037	0.3202		100.058		1.81293	49.0799	49.1072
219/1973.9	plg2 core-rim	58.1578	25.9967	0.5032	8.5725	6.6217	0.436		100.35		2.46338	56.8594	40.6772
219/1973.9	plg2 core-rim	58.084	25.4199	0.5045	7.841	6.948	0.4896		99.289		2.77639	59.8806	37.343
219/1973.9	plg2 core-rim	62.9867	23.216	0.2916	4.727	8.4066	0.9534		100.592		5.38652	72.1841	22.4294
219/1973.9	plg2 core-rim	65.0131	21.5812	0.3417	3.1175	9.2573	1.393		100.729		7.70443	77.8147	14.4809
219/1973.9	albite	65.1148	21.4515	0.40966	2.92416	9.74055	0.63406		100.357		3.54494	82.6983	13.7568
219/1973.9	STDEV on 10 analyses	1.48716	0.655892	0.248583	0.838611	0.601082	0.211755
219/1973.9	k-feldspar in pocket	65.2935	18.336	0.16268	0.07296	2.42162	13.5655		99.8714		78.4009	21.246	0.353148
219/1973.9	STDEV on 6 analyses	0.359898	0.180965	0.0718707	0.0593762	1.21054	1.84286
219/1973.9	k-feldspar in pocket	65.7467	18.4508	0.0934	0.1689	3.9732	11.2155		99.6663		64.4723	34.7123	0.815424
219/1973.9	k-feldspar in pocket	65.4721	18.5191	0.082	0.081	3.2822	12.2508		99.7145		70.7847	28.8222	0.39306
219/1973.9	k-feldspar pocket 2	65.3405	18.3836	0.1892	0.0459	2.3247	13.7095		100.031		79.3322	20.4448	0.223069
219/1973.9	k-feldspar pocket 2	65.1097	18.2688	0.2471	0.0106	1.3736	15.0859		100.111		87.7985	12.1497	0.0518109
219/1973.9	k-feldspar pocket 2	64.7987	18.0576	0.2017	0.0584	1.1544	15.5658		99.8346		89.6167	10.1009	0.282377
219/1973.9	k-feldspar in pocket	65.2935	18.336	0.16268	0.07296	2.42162	13.5655		99.8714		78.4009	21.246	0.353148
219/1973.9	STDEV on 6 analyses	0.359898	0.180965	0.0718707	0.0593762	1.21054	1.84286
219/1976.2	plag1 line core-rim	50.5009	30.7404	0.8595	14.4615	3.399	0.1642		100.147		0.939605	29.5605	69.4999
219/1976.2	plag1 line core-rim	50.3943	30.3902	0.5047	14.0141	3.6026	0.1878		99.1418		1.07728	31.4079	67.5148
219/1976.2	plag1 line core-rim	56.4429	26.5761	0.5689	9.5877	6.1218	0.4926		99.8864		2.75986	52.1267	45.1135
219/1976.2	plag1 line core-rim	58.2338	26.0411	0.4691	8.3971	6.3348	0.496		100.029		2.88776	56.0532	41.059
219/1976.2	plag1 line core-rim	64.1244	21.6638	0.3679	2.9975	9.3609	0.4416		99.0258		2.56957	82.7821	14.6484
219/1976.2	homogeneous plg rim to rim	51.9131	29.198	0.77825	12.9808	4.10808	0.1944		99.2401		1.12177	36.0094	62.8689
219/1976.2	STDEV on 4 analyses	0.03784	0.108594	0.0523417	0.251635	0.0463483	0.0360433
219/1976.2	homogeneous plg rim to rim	53.3172	28.3257	0.7976	12.0902	4.795	0.2581		99.6607		1.45893	41.1773	57.3638
219/1976.2	STDEV on 5 analyses	0.137543	0.231484	0.0779626	0.328861	0.111143	0.0250043
219/1976.2	homogeneous plg2 rim to core	50.0812	30.1869	0.652733	14.449	3.3719	0.1421		98.9496		0.816193	29.4509	69.7329
219/1976.2	STDEV on 3 analyses	0.149177	0.14168	0.0904352	0.216575	0.0743873	0.0151555
219/1976.2	zoned plg core	51.6475	29.7799	0.603572	13.5847	4.04833	0.209722		99.9244		1.17861	34.5897	64.2317
219/1976.2	STDEV on 8 analyses	0.893296	0.150452	0.173525	0.478276	0.428035	0.0306103
219/1976.2	zoned plg rim	57.3016	26.1724	0.47284	9.0135	6.37066	0.5171		99.912		2.90255	54.4219	42.6755
219/1976.2	STDEV on 7 analyses	1.49392	0.595728	0.0876687	1.12798	0.728047	0.116878
219/1976.2	rim to core plag2	49.9111	30.3496	0.7011	14.3376	3.4505	0.1509		99.0076		0.865434	30.0756	69.059
219/1976.2	rim to core plag2	50.1425	30.0905	0.5484	14.3108	3.3626	0.1246		98.629		0.722153	29.6193	69.6586
219/1976.2	rim to core plag2	50.1899	30.1207	0.7087	14.6986	3.3026	0.1508		99.2121		0.860993	28.6578	70.4812
219/1976.2	homogeneous plg2 rim to core	50.0812	30.1869	0.652733	14.449	3.3719	0.1421		98.9496		0.816193	29.4509	69.7329
219/1976.2	STDEV on 3 analyses	0.149177	0.14168	0.0904352	0.216575	0.0743873	0.0151555
219/1979.0	plg1 c-r	51.5962	28.9818	0.6618	13.3207	4.0213	0.1833		98.876		1.04849	34.9589	63.9926
219/1979.0	plg1 c-r	51.813	28.3656	0.6751	13.0798	4.3445	0.2139		98.6109		1.20157	37.0908	61.7076
219/1979.0	plg1 c-r	51.8627	28.8004	0.6715	12.7418	4.2321	0.1943		98.5538		1.12135	37.1202	61.7585
219/1979.0	plg1 c-r	52.2978	28.9592	0.6448	12.8834	4.3103	0.2135		99.406		1.21415	37.2536	61.5322
219/1979.0	plg1 c-r	51.8656	28.6834	0.6429	13.018	4.3193	0.1888		98.7573		1.06749	37.1161	61.8164
219/1979.0	plg1 c-r	52.1816	28.3851	0.7078	12.6075	4.4243	0.2154		98.5909		1.2289	38.3623	60.4088
219/1979.0	plg1 c-r	52.8126	27.8696	0.6317	11.9944	4.6708	0.2397		98.2826		1.37665	40.7694	57.8539
219/1979.0	plg1 c-r	53.0266	27.604	0.6641	11.6202	4.9495	0.2411		98.1928		1.37594	42.9291	55.6949
219/1979.0	plg1 c-r	53.9913	27.4476	0.7043	10.623	5.4924	0.2531		98.6353		1.44446	47.639	50.9165
219/1979.0	plg1 c-r	55.9362	26.3969	0.4413	9.3446	6.1798	0.2582		98.6584		1.47557	53.6743	44.8501
219/1979.0	plg1 c-r	58.9479	24.8179	0.3517	7.2446	7.6846	0.2558		99.3383		1.41959	64.8146	33.7658
219/1979.0	plg1 c-r	65.4856	20.6471	0.3618	1.7231	10.4343	0.5685		99.2736		3.18064	88.7229	8.09644
219/1979.0	plg1 c-r	67.7061	18.6236	0.7314	0.4697	11.1585	0.3134		99.0638		1.77397	95.9931	2.23288
219/1979.0	plg core	54.8033	27.6921	0.648567	11.0275	5.2849	0.2744		99.7905		1.56011	45.693	52.7469
219/1979.0	STDEV on 3 analyses	0.691386	0.610747	0.151863	0.597753	0.452546	0.0420753
219/1979.0	plg intermediate	58.8354	25.1101	0.37705	7.61432	7.07005	0.37475		99.4141		2.13882	61.3289	36.5323
219/1979.0	STDEV on 4 analyses	1.29131	0.743703	0.0640145	1.12457	0.668994	0.0417828
219/1979.0	plg rim	64.917	22.4895	0.159133	3.54257	9.5422	0.435		101.109		2.43214	80.9728	16.5951
219/1979.0	STDEV on 3 analyses	0.773331	0.794959	0.0230791	0.615069	0.234473	0.0788617
219/1979.0	homogeneous plg3	53.7201	28.1693	0.711922	11.8009	4.77729	0.252644		99.5062		1.45049	41.6735	56.8761
219/1979.0	STDEV on 9 analyses	0.40433	0.287973	0.0624394	0.343296	0.140524	0.0230952
219/1979.0	homogeneous plg in cpx	52.0487	28.8415	0.766167	12.8251	4.31523	0.2175		99.0615		1.23971	37.3771	61.3831
219/1979.0	STDEV on 3 analyses	0.502971	0.210947	0.0812662	0.560974	0.265462	0.048427
219/2007.0 A	core to rim plag	47.9457	32.2715	0.3776	15.8693	2.3977	0.0853		99.0209		0.500085	21.3638	78.1361
219/2007.0 A	core to rim plag	49.0515	31.2066	0.494	14.9019	3.128	0.1104		98.9491		0.635226	27.3536	72.0112
219/2007.0 A	core to rim plag	54.6661	27.4895	0.5645	10.7236	5.2666	0.2915		99.1034		1.68479	46.2621	52.0531
219/2007.0 A	core to rim plag	57.9286	25.9385	0.493	8.6295	6.5023	0.4025		99.9736		2.29578	56.3663	41.338
219/2007.0 A	core to rim plag	48.1459	31.1771	0.6507	15.8354	2.565	0.0938		98.5077		0.542467	22.5448	76.9128
219/2007.0 A	core to rim plag	51.1746	29.8797	0.3839	13.6521	3.6982	0.1296		98.9834		0.752797	32.6476	66.5996
219/2007.0 A	core to rim plag	54.0515	27.6329	0.4947	10.9616	4.9541	0.3055		98.4755		1.79276	44.1837	54.0235
219/2007.A	homogeneous plg in ol	46.8089	31.8648	1.22853	16.5323	2.1698	0.0611		98.6841		0.354545	19.1278	80.5176
219/2007.A	STDEV on 3 analyses	0.540274	0.230707	0.0695613	0.35858	0.121066	0.0119025
219/2007.A	plg2 8pt c-r	48.1819	30.9349	0.6392	15.7757	2.5842	0.1059		98.2257		0.612758	22.7252	76.6621
219/2007.A	plg2 8pt c-r	47.8433	31.2588	0.6356	16.3499	2.4342	0.1025		98.7026		0.584599	21.0998	78.3156
219/2007.A	plg2 8pt c-r	48.269	30.9088	0.5525	15.9659	2.6723	0.1109		98.4581		0.630789	23.1007	76.2685
219/2007.A	plg2 8pt c-r	48.2807	30.845	0.638	15.2798	2.9487	0.0939		98.1917		0.539407	25.7436	73.717
219/2007.A	plg2 8pt c-r	47.8202	31.6153	0.5835	15.8977	2.5531	0.0966		98.6092		0.557466	22.3922	77.0503
219/2007.A	plg2 8pt c-r	52.3454	28.7708	0.6037	12.7589	4.344	0.2207		99.146		1.25839	37.6437	61.0979
219/2007.A	plg2 8pt c-r	53.0655	28.248	0.6894	11.7169	4.8186	0.219		98.7984		1.25987	42.13	56.6101
219/2007.A	homogeneous plg	52.709	28.4077	0.729171	12.2647	4.60234	0.257414		99.0594		1.46664	39.8326	58.7008
219/2007.A	STDEV on 7 analyses	0.826362	0.455292	0.0750942	0.642922	0.422961	0.0142356
219/2007.A	plg1 15pt c-r	47.4006	31.4761	0.5635	16.0102	2.4616	0.0932		98.0758		0.539338	21.6496	77.811
219/2007.A	plg1 15pt c-r	47.9377	31.0636	0.658	16.1317	2.5052	0.1076		98.4361		0.616155	21.8026	77.5813
219/2007.A	plg1 15pt c-r	47.8904	31.499	0.5254	16.3327	2.6121	0.102		98.9828		0.573394	22.3167	77.1099
219/2007.A	plg1 15pt c-r	48.0707	31.391	0.5486	16.2881	2.4512	0.0948		98.9		0.541726	21.2881	78.1701
219/2007.A	plg1 15pt c-r	47.9936	31.4245	0.56	15.6634	2.5364	0.0844		98.3103		0.493739	22.5507	76.9555
219/2007.A	plg1 15pt c-r	49.8911	29.7618	0.6546	14.2571	3.4988	0.1793		98.3264		1.0263	30.4369	68.5368
219/2007.A	plg1 15pt c-r	48.0887	31.8127	0.5705	16.0121	2.6134	0.0943		99.2119		0.538431	22.6784	76.7832
219/2007.A	plg1 15pt c-r	48.5423	31.2221	0.5401	15.8534	2.6832	0.0955		99.006		0.546094	23.3187	76.1352
219/2007.A	plg1 15pt c-r	51.5051	29.3223	0.6206	13.2817	3.9143	0.2151		98.9221		1.24201	34.3501	64.4079
219/2007.A	plg1 15pt c-r	52.0654	28.7272	0.564	12.9123	4.2965	0.2453		98.9185		1.39221	37.0604	61.5474
219/2007.A	plg1 15pt c-r	53.5868	27.9904	0.4982	11.5929	4.827	0.2655		98.846		1.53133	42.3127	56.156
219/2007.A	plg1 15pt c-r	54.3859	27.5648	0.5787	11.0287	5.3351	0.2952		99.3227		1.67101	45.8981	52.4309
219/2007.A	albitic rim	62.1625	22.5732	0.4769	4.31577	9.3336	0.231		99.0739		1.28104	78.6246	20.0944
219/2007.A	STDEV on 3 analyses	0.15178	0.141779	0.0835759	0.176038	0.175229	0.0496426
219-2040-2045	plg phenocryst c-r	47.3194	31.3797	0.657	15.7882	2.7223	0.0377		97.9196		0.216235	23.7306	76.0531
219-2040-2045	plg phenocryst c-r	48.6131	30.4295	0.5394	15.151	3.209	0.0804		98.0551		0.454701	27.5821	71.9632
219-2040-2045	plg phenocryst c-r	48.7114	30.2605	0.6796	14.4153	3.334	0.2211		97.6197		1.27107	29.1297	69.5993
219-2040-2045	plg phenocryst c-r	49.0824	30.3899	0.8947	15.0841	3.2643	0.0246		98.6457		0.139345	28.1018	71.7588
219-2040-2045	plg phenocryst c-r	47.6493	31.2018	0.7032	15.7936	2.8531	0.0419		98.2232		0.237498	24.5783	75.1842
219-2040-2045	plg phenocryst c-r	47.0791	32.041	0.4919	16.0933	2.6262	0.088		98.4174		0.500137	22.6841	76.8158
219-2040-2045	plg phenocryst c-r	49.9326	29.827	0.7174	13.8565	3.9399	0.1126		98.4056		0.634803	33.7578	65.6074
219-2040-2045	plg phenocryst c-r	50.4383	29.3896	0.7649	13.4533	4.093	0.0506		98.2072		0.287993	35.4048	64.3072
219-2040-2045	plg phenocryst c-r	51.264	29.1593	0.4411	12.8625	4.4736	0.0664		98.2778		0.375823	38.4822	61.142
219-2040-2045	plg phenocryst c-r	61.3405	23.1796	0.3568	5.0176	8.9583	0.1469		98.9624		0.817211	75.7401	23.4427
219-2040-2045	plg rim-to-rim	60.7952	21.8677	0.6276	5.8536	9.0622	0.1483		98.392		0.787272	73.1148	26.0979
219-2040-2045	plg rim-to-rim	62.9424	21.9589	0.4837	3.9343	9.6364	0.2119		99.172		1.16675	80.6399	18.1934
219-2040-2045	plg rim-to-rim	59.6291	21.956	0.6241	6.1945	8.5853	0.1373		97.1481		0.746695	70.9604	28.2929
219-2040-2045	plg rim-to-rim	55.92	25.6285	0.8352	8.9119	6.6012	0.0852		97.9887		0.484026	56.9954	42.5205
219-2040-2045	plg rim-to-rim	51.447	28.6822	0.9607	12.5254	4.641	0.0555		98.3205		0.314835	40.0119	59.6733
219-2040-2045	plg rim-to-rim	52.3757	28.7177	0.6527	12.0879	4.9462	0.1119		98.8943		0.629319	42.2766	57.094
219-2040-2045	plg rim-to-rim	53.0143	28.0049	0.7714	11.2976	5.2664	0.0799		98.4345		0.4547	45.5491	53.9962
219-2040-2045	plg rim-to-rim	54.4482	27.4962	0.5046	10.5818	5.7321	0.0662		98.8444		0.374753	49.3162	50.3091
219-2040-2045	plg rim-to-rim	62.2393	22.798	0.4659	4.7762	9.1915	0.2141		99.707		1.17672	76.7769	22.0464
219-2040-2045	plg rim-to-rim	60.9578	22.9095	0.5114	4.8653	9.013	0.142		98.3748		0.792141	76.4137	22.7941
219/3870-3875	plag, c-to albitic rim	52.145	29.3981	0.617	13.2918	4.1098	0.1952		99.7962		1.10882	35.4804	63.4108
219/3870-3875	plag, c-to albitic rim	51.2573	29.6102	0.5853	13.6114	4.0517	0.1705		99.2907		0.960036	34.6727	64.3672
219/3870-3875	plag, c-to albitic rim	50.7101	29.8883	0.5756	13.9547	3.9152	0.1618		99.1728		0.907361	33.369	65.7236
219/3870-3875	plag, c-to albitic rim	51.4653	29.81	0.5677	13.672	4.1331	0.1601		99.8499		0.893217	35.0453	64.0615
219/3870-3875	plag, c-to albitic rim	51.7701	29.5466	0.5305	13.0184	4.0563	0.2014		99.1122		1.16419	35.6354	63.2004
219/3870-3875	plag, c-to albitic rim	51.4558	29.3383	0.4776	13.0953	4.0923	0.1947		98.6364		1.11818	35.7192	63.1627
219/3870-3875	plag, c-to albitic rim	52.2351	29.1554	0.3853	12.5656	4.4436	0.247		99.0473		1.40712	38.4731	60.1197
219/3870-3875	plag, c-to albitic rim	51.9715	29.234	0.4304	13.2145	4.3348	0.1763		99.4032		0.986985	36.8821	62.131
219/3870-3875	plag, c-to albitic rim	51.4431	29.3982	0.452	13.1897	4.1706	0.1964		98.8544		1.11514	35.9892	62.8956
219/3870-3875	plag, c-to albitic rim	51.4502	29.3619	0.558	13.2943	4.2424	0.2159		99.0634		1.21097	36.1643	62.6247
219/3870-3875	plag, c-to albitic rim	51.8867	28.9577	0.4934	12.9315	4.4118	0.2199		98.9274		1.23641	37.6998	61.0638
219/3870-3875	plag, c-to albitic rim	52.0538	29.0771	0.4737	12.7473	4.3628	0.2334		98.8954		1.32842	37.7387	60.9328
219/3870-3875	plag, c-to albitic rim	52.48	28.7908	0.4953	12.8047	4.5756	0.2542		99.4204		1.4152	38.7148	59.87
219/3870-3875	plag, c-to albitic rim	52.6515	29.0462	0.4836	12.5228	4.6591	0.2636		99.6444		1.47578	39.643	58.8812
219/3870-3875	plag, c-to albitic rim	52.8008	28.6695	0.5228	12.1671	4.7811	0.2711		99.2475		1.52681	40.9235	57.5497
219/3870-3875	plag, c-to albitic rim	53.1504	28.3791	0.46	12.4	4.738	0.2612		99.4151		1.46117	40.2819	58.2569
219/3870-3875	plag, c-to albitic rim	53.2317	28.3797	0.5328	12.0013	4.8801	0.2799		99.3319		1.5746	41.7238	56.7016
219/3870-3875	plag, c-to albitic rim	53.9835	27.919	0.4661	11.5239	5.1192	0.2599		99.2848		1.46684	43.9103	54.6229
219/3870-3875	plag, c-to albitic rim	54.857	27.2202	0.5133	10.581	5.6918	0.3497		99.224		1.9551	48.3628	49.6821
219/3870-3875	plag, c-to albitic rim	55.4524	26.9301	0.4484	10.24	5.8665	0.4066		99.3397		2.26865	49.747	47.9843
219/3870-3875	plag, c-to albitic rim	56.097	26.5116	0.5392	9.54	6.2402	0.4056		99.3225		2.26572	52.9779	44.7564
219/3870-3875	plag, c-to albitic rim	57.434	25.5504	0.4665	8.4927	6.8407	0.5043		99.2776		2.79648	57.6516	39.5519
219/3870-3875	plag, c-to albitic rim	57.6728	25.5341	0.606	8.516	6.8091	0.4366		99.5352		2.43404	57.6929	39.8731
219/3870-3875	homogeneous plg	54.1571	27.6694	0.66322	11.3121	5.12784	0.309947		99.2433		1.76057	44.2709	53.9686
219/3870-3875	STDEV on 30 analyses	0.29087	0.14666	0.0415719	0.139876	0.0740685	0.0171261
219/3870-3875	c-r line in zoned plg	52.9636	28.259	0.4621	11.763	4.9418	0.2641		98.6733		1.496	42.5437	55.9603
219/3870-3875	c-r line in zoned plg	52.7766	28.7985	0.4073	12.1752	4.7147	0.22		99.1099		1.24924	40.6879	58.0629
219/3870-3875	c-r line in zoned plg	52.3872	28.4833	0.3879	12.1162	4.7637	0.2567		98.3621		1.45255	40.9674	57.58
219/3870-3875	c-r line in zoned plg	52.6187	28.7043	0.4876	12.1685	4.679	0.267		98.9273		1.51723	40.4094	58.0734
219/3870-3875	c-r line in zoned plg	52.5242	28.98	0.4446	12.2262	4.716	0.2597		99.1835		1.46763	40.5047	58.0276
219/3870-3875	c-r line in zoned plg	52.3257	28.9094	0.6108	12.1483	4.6468	0.2633		98.852		1.50215	40.2906	58.2072
219/3870-3875	c-r line in zoned plg	52.4142	28.6888	0.4583	12.2323	4.6762	0.2511		98.6794		1.42418	40.3086	58.2672
219/3870-3875	c-r line in zoned plg	52.4904	28.6678	0.5484	12.1178	4.7525	0.2634		98.8754		1.49122	40.8919	57.6169
219/3870-3875	c-r line in zoned plg	52.7579	28.6138	0.4368	12.3316	4.6694	0.2951		99.1308		1.66269	39.9845	58.3528
219/3870-3875	c-r line in zoned plg	52.7292	28.8827	0.5191	12.0398	4.5802	0.2501		98.9989		1.44377	40.1844	58.3718
219/3870-3875	c-r line in zoned plg	52.1311	28.8128	0.5191	12.2767	4.7107	0.2438		98.6766		1.37634	40.4171	58.2066
219/3870-3875	c-r line in zoned plg	52.5771	28.9763	0.5505	12.2377	4.6802	0.2469		99.2839		1.39985	40.3284	58.2717
219/3870-3875	c-r line in zoned plg	52.0788	28.5394	0.5131	12.2586	4.5644	0.2645		98.2296		1.5117	39.6472	58.8411
219/3870-3875	c-r line in zoned plg	52.491	28.6712	0.5486	12.0417	4.7246	0.2452		98.7266		1.39804	40.9404	57.6615
219/3870-3875	c-r line in zoned plg	52.4137	28.5325	0.5074	12.3271	4.6495	0.2591		98.6826		1.46564	39.9718	58.5625
219/3870-3875	c-r line in zoned plg	52.2021	28.6346	0.57	12.5607	4.7505	0.2608		98.9787		1.4465	40.0442	58.5093
219/3870-3875	c-r line in zoned plg	55.6207	26.3432	0.5215	9.5226	6.2118	0.4575		98.6378		2.55648	52.7541	44.6895
219/3870-3875	c-r line in zoned plg	56.5906	25.8503	0.5276	8.8119	6.2595	0.5033		98.5126		2.88968	54.6198	42.4905
219/3870-3875	c-r line in zoned plg	56.9745	25.5498	0.5686	8.5588	6.5509	0.5502		98.7944		3.10947	56.267	40.6235
219/3870-3875	c-r line in zoned plg	56.585	25.5975	0.3981	8.4871	6.6954	0.6552		98.4379		3.64836	56.6615	39.6901
219/3870-3875	c-r line in zoned plg	57.3089	25.6068	0.3824	8.2332	6.6381	0.6161		98.8205		3.49673	57.2588	39.2445
219/3870-3875	c-r line in zoned plg	57.3765	25.3523	0.4727	8.2634	6.773	0.5982		98.8273		3.35468	57.7263	38.9191
219/3870-3875	c-r line in zoned plg	57.4054	25.288	0.557	7.9809	6.9076	0.6238		98.8044		3.49963	58.8969	37.6035
219/3870-3875	c-r line in zoned plg	57.9822	25.5245	0.457	8.0062	6.6902	0.5585		99.2012		3.20052	58.2673	38.5322
219/3870-3875	c-r line in zoned plg	58.1872	25.415	0.4062	8.0013	6.8111	0.5199		99.3472		2.95544	58.8447	38.1999
219/3870-3875	c-r line in zoned plg	57.7829	25.2212	0.5041	7.586	7.1274	0.5367		98.7605		3.02536	61.0611	35.9135
219/3870-3875	c-r line in zoned plg	59.206	24.0419	0.4572	6.7322	7.8001	0.552		98.8156		3.05637	65.638	31.3057
219/3870-3875	c-r line in zoned plg	61.2157	23.552	0.3357	5.2211	8.3957	0.6578		99.4239		3.69498	71.6742	24.6308
219/3870-3875	c-r line in zoned plg	63.2372	21.943	0.385	3.7171	8.9362	0.9816		99.1868		5.55057	76.7969	17.6525
219/3870-3875	kfeld in micropegmatite	64.5554	18.8064	0.2019	0.4695	5.0184	9.3174		98.3777		53.7376	43.9883	2.27415
219/3870-3875	kfeld in micropegmatite	64.7321	18.9529	0.1864	0.6322	5.072	9.2221		98.7517		52.8139	44.1454	3.04069
219/3870-3875	kfeld in micropegmatite	65.0901	19.1336	0.353	0.6482	4.8894	9.3382		99.4788		53.9359	42.9198	3.14429
219/2007.A	homogeneous plg in ol	64.7925	18.9643	0.2471	0.5833	4.99327	9.29257		98.8694		53.4958	43.6845	2.81971
219/2007.A	STDEV on 3 analyses	0.272425	0.163898	0.092039	0.0988779	0.0938587	0.0619058
219/3891.7	plg A-B r-r	53.1363	28.9594	0.57	12.5481	4.363	0.1919		99.8527		1.10533	38.1937	60.701
219/3891.7	plg A-B r-r	51.4426	29.2591	0.5879	13.6761	3.7424	0.2487		98.9721		1.42749	32.6463	65.9262
219/3891.7	plg A-B r-r	51.7521	29.279	0.5458	13.0122	3.9687	0.2555		98.9087		1.48414	35.0364	63.4795
219/3891.7	plg A-B r-r	51.9464	29.2566	0.551	13.3844	4.0088	0.2987		99.5		1.69407	34.554	63.752
219/3891.7	plg A-B r-r	51.4239	29.4397	0.4934	13.4903	3.7713	0.2613		98.9119		1.50843	33.0875	65.4041
219/3891.7	plg A-B r-r	50.168	30.4161	0.5253	14.4462	3.442	0.1828		99.2047		1.0418	29.8131	69.1451
219/3891.7	plg A-B r-r	51.3898	29.5159	0.4576	13.71	3.7635	0.2179		99.1192		1.24857	32.7745	65.977
219/3891.7	plg A-B r-r	53.6326	28.348	0.4681	12.2741	4.6793	0.3224		99.8245		1.81712	40.0827	58.1002
219/3891.7	plg A-B r-r	51.6166	29.4822	0.4641	13.3702	3.7944	0.2438		99.0202		1.4142	33.4509	65.1349
219/3930.6	plg c-r	50.1788	30.6175	0.4854	14.519	3.4893	0.2147		99.4882		1.21221	29.9414	68.8464
219/3930.6	plg c-r	49.2006	31.9776	0.4519	15.7118	2.7025	0.157		100.22		0.899211	23.5242	75.5765
219/3930.6	plg c-r	48.4015	32.3702	0.567	15.886	2.5953	0.1281		99.9439		0.735605	22.6502	76.6142
219/3930.6	plg c-r	50.2464	31.0472	0.489	14.971	3.2329	0.2058		100.172		1.1632	27.771	71.0658
219/3930.6	plg c-r	50.8264	30.4022	0.5023	14.1962	3.5858	0.2204		99.723		1.25279	30.9771	67.7701
219/3930.6	plg c-r	52.1343	29.3715	0.5413	13.1678	4.0148	0.3008		99.5038		1.72265	34.944	63.3334
219/3930.6	plg c-r	52.5587	28.4824	0.7106	12.5588	4.2001	0.3108		98.8358		1.80262	37.0229	61.1745
219/3930.6	plg c-r	53.4724	28.9316	0.536	12.7287	4.5046	0.3707		100.573		2.07015	38.2316	59.6982
219/3930.6	plg c-r	54.3302	28.4017	0.6347	11.8875	4.776	0.3867		100.433		2.19355	41.1743	56.6322
219/3930.6	plg c-r	54.575	27.9712	0.6087	11.3519	5.1188	0.386		100.02		2.18086	43.9539	53.8653
219/3930.6	plg r-c	53.672	28.0046	0.4539	10.8403	5.0685	0.343		98.3252		1.99996	44.9154	53.0846
219/3930.6	plg r-c	54.2415	28.556	0.4484	11.5211	4.8576	0.453		100.053		2.58687	42.1585	55.2546
219/3930.6	plg r-c	52.4886	29.395	0.4779	12.6888	4.4095	0.3541		99.8051		1.99918	37.8357	60.1651
219/3930.6	plg r-c	52.8425	29.5346	0.4996	12.4726	4.4348	0.3223		100.124		1.83779	38.4324	59.7298
219/3930.6	plg r-c	52.2266	29.4358	0.4938	12.9401	4.1522	0.3172		99.5284		1.81305	36.0697	62.1173
219/3930.6	plg r-c	51.9749	29.7292	0.5904	13.4448	4.1213	0.3162		100.168		1.76932	35.0482	63.1825
219/3930.6	plg r-c	51.8795	29.8399	0.6043	13.4009	3.9	0.2759		99.8742		1.58038	33.9518	64.4678
219/3930.6	plg r-c	50.3658	30.9597	0.4855	14.568	3.3398	0.2078		99.9048		1.18617	28.9742	69.8396
219/3930.6	plg r-c	50.5291	30.5051	0.5546	14.3419	3.4097	0.2289		99.5891		1.3113	29.6866	69.0021
219/3930.6	plg r-c	50.1436	31.0292	0.5585	14.7483	3.1996	0.2035		99.8982		1.16602	27.8628	70.9712
219/3930.6	plg r-c	48.0019	31.7541	0.5959	16.1475	2.4601	0.1352		99.1057		0.775431	21.4441	77.7805
219/3930.6	plg r-c	49.3923	31.1727	0.6296	15.3698	2.9596	0.1481		99.6678		0.843665	25.6233	73.533
219/3930.6	points in plg	62.1337	23.1183	0.3558	5.4139	7.9701	0.8711		99.8148		4.96893	69.095	25.9361
219/3930.6	points in plg	61.5097	23.1782	0.3374	5.1442	8.3405	0.6505		99.1914		3.68623	71.8315	24.4823
219/3930.6	points in plg	62.2433	23.9277	0.369	5.3417	8.2133	0.6795		100.796		3.85023	70.7298	25.42
219/3930.6	plg c-r	48.5294	31.1008	0.3395	14.9467	2.9926	0.1206		98.0012		0.70028	26.4096	72.8902
219/3930.6	plg c-r	49.1547	30.8954	0.401	15.0689	3.1198	0.1597		98.7863		0.909623	27.0067	72.0837
219/3930.6	plg c-r	49.448	30.7577	0.4108	14.8672	3.2795	0.1886		98.8992		1.06801	28.2248	70.7072
219/3930.6	plg c-r	51.572	29.0898	0.5276	13.1164	3.9774	0.2152		98.4897		1.24567	34.9904	63.764
219/3930.6	plg c-r	53.403	27.8915	0.676	11.5966	4.8561	0.3285		98.7276		1.88272	42.2986	55.8187
219/3930.6	plg r-r	60.2659	24.6621	0.4811	6.5933	7.6625	0.6396		100.348		3.58873	65.3418	31.0695
219/3930.6	plg r-r	59.8009	24.3732	0.4396	6.9374	7.3662	0.5788		99.5266		3.28857	63.6078	33.1036
219/3930.6	plg r-r	59.4942	24.4302	0.3742	6.9237	7.475	0.6312		99.3262		3.54476	63.7997	32.6555
219/3930.6	plg r-r	59.8623	24.2951	0.3229	6.6101	7.7265	0.5879		99.407		3.28764	65.6676	31.0447
219/3930.6	plg r-r	57.5809	25.9518	0.4197	8.9588	6.3512	0.6324		99.8969		3.55102	54.2006	42.2483
219/3930.6	plg r-r	57.2708	26.1882	0.3128	8.9098	6.3965	0.6945		99.7725		3.88015	54.3134	41.8065
219/3930.6	plg r-r	57.6047	26.2056	0.3822	8.8218	6.2658	0.7394		100.017		4.18422	53.889	41.9268
219/3930.6	plg r-r	55.4423	25.9731	0.9079	8.8736	6.0149	0.7337		98.0836		4.23428	52.7567	43.0091
219/3930.6	plg r-r	57.4729	26.0716	0.3623	9.0297	6.1082	0.7901		99.8326		4.47473	52.5758	42.9494
219/3930.6	plg r-r	57.3031	25.866	0.2989	8.8736	6.1782	0.8085		99.3502		4.58058	53.1974	42.222
219/3930.6	plg r-r	57.6945	26.0877	0.3743	8.9589	6.1894	0.7827		100.085		4.41867	53.1047	42.4766
219/3930.6	plg r-r	57.026	26.0385	0.3782	8.929	6.2055	0.7908		99.4186		4.46252	53.2204	42.3171
219/3930.6	plg r-r	57.0544	26.2542	0.4019	8.963	6.3204	0.7401		99.6945		4.14079	53.7434	42.1158
219/3930.6	plg r-r	57.0832	25.9197	0.4435	9.1208	6.1209	0.7405		99.4087		4.18288	52.5476	43.2695
219/3930.6	plg r-r	56.7485	26.4262	0.495	9.5165	6.2524	0.6676		100.15		3.67572	52.3192	44.0051
219/3930.6	plg r-r	56.6558	26.6244	0.5049	9.619	6.1891	0.5653		100.167		3.13186	52.1121	44.7561
219/3930.6	plg c-r	57.161	26.5068	0.3188	9.2127	6.1313	0.7558		100.067		4.24334	52.3169	43.4398
219/3930.6	plg c-r	56.7658	26.218	0.4138	8.9713	6.1234	0.7139		99.2259		4.0667	53.0134	42.92
219/3930.6	plg c-r	56.7656	25.9122	0.4001	9.0866	6.0676	0.792		99.0219		4.48855	52.2619	43.2495
219/3930.6	plg c-r	56.7904	26.1464	0.406	8.9861	6.2996	0.7331		99.3945		4.10604	53.6242	42.2698
219/3930.6	plg c-r	56.9741	26.4304	0.4674	8.7978	6.265	0.726		99.6189		4.11649	53.9883	41.8952
219/3930.6	plg c-r	56.9886	25.9335	0.4079	8.832	6.3296	0.7691		99.2717		4.31924	54.0243	41.6565
219/3930.6	plg c-r	57.2203	26.0926	0.3683	8.9525	6.428	0.6805		99.7531		3.78718	54.369	41.8438
219/3930.6	plg c-r	57.6059	26.3369	0.4336	8.831	6.2539	0.6302		100.067		3.59056	54.153	42.2564
219/3930.6	plg c-r	57.7726	25.7158	0.4199	8.7152	6.4534	0.6086		99.6965		3.43145	55.2997	41.2689
219/3930.6	plg c-r	58.0028	26.2619	0.4417	8.9398	6.5071	0.4865		100.677		2.7203	55.2979	41.9818
219/3930.6	plg c-r	60.7117	23.8675	0.3726	6.0833	8.1435	0.6882		99.8647		3.78678	68.1011	28.1121
219/3930.6	plg c-r	62.6824	22.8988	0.4104	4.8715	8.9288	0.7129		100.507		3.87989	73.8536	22.2665
219/3930.6	albitic rim plg	62.1832	23.2135	0.4915	5.0457	8.601	0.7246		100.233		4.01796	72.4842	23.4978
219/3930.6	albitic rim plg	61.0937	23.3592	0.3311	5.6692	8.2063	0.662		99.394		3.69931	69.6944	26.6063
219/3930.6	albitic rim plg	61.7719	22.8193	0.2677	5.1291	8.535	0.8336		99.3741		4.60227	71.6154	23.7824
219/3933.5	line in plagioclase pocket A c-r	48.5983	31.8485	0.4424	15.7356	2.7016	0.1558		99.5147		0.891449	23.493	75.6156
219/3933.5	line in plagioclase pocket A c-r	48.1203	32.0603	0.442	16.048	2.6175	0.1415		99.4768		0.804095	22.6061	76.5898
219/3933.5	line in plagioclase pocket A c-r	49.5024	31.2815	0.3995	15.2268	3.0919	0.157		99.6827		0.889809	26.6324	72.4778
219/3933.5	line in plagioclase pocket A c-r	54.3607	28.0754	0.4328	11.1407	5.1689	0.3185		99.5795		1.81681	44.8113	53.3719
219/3933.5	line in plagioclase pocket A c-r	57.2749	27.2154	0.4818	9.3247	6.2976	0.3496		101.04		1.96935	53.9157	44.115
219/3933.5	plagioclase sorrounding pocket A Na-rich rim	62.1884	23.8524	0.132	5.5754	8.3366	0.7003		100.767		3.87918	70.1831	25.9377
219/3933.5	plagioclase sorrounding pocket A Na-rich rim	61.784	23.8504	0.0635	5.5705	8.1442	0.7135		100.111		4.01532	69.6566	26.3281
219/3933.5	plagioclase sorrounding pocket A Na-rich rim	61.9559	24.0104	0.1331	5.5769	8.4334	0.5972		100.708		3.2998	70.8204	25.8797
219/3933.5	plagioclse A-B rim to core, pocket B	61.4257	24.3264	0.4587	6.1884	8.0277	0.4394		100.913		2.46339	68.3993	29.1373
219/3933.5	plagioclse A-B rim to core, pocket B	55.6168	28.2181	0.4084	11.0563	5.4025	0.3352		101.13		1.87982	46.0462	52.0739
219/3933.5	plagioclse A-B rim to core, pocket B	52.7495	29.9413	0.4502	12.8008	4.4299	0.3229		100.775		1.81342	37.8104	60.3762
219/3933.5	plagioclse A-B rim to core, pocket B	48.6597	32.9852	0.5301	16.2611	2.4248	0.1266		100.995		0.724728	21.0962	78.179
260-2204.6A	zoned plg phenocryst	50.4722	29.7053	0.7372	13.6227	3.6583	0.0476		98.3405		0.279204	32.6124	67.1084
260-2204.6A	zoned plg phenocryst	50.879	30.314	0.5398	13.7939	3.6399	0.0709		99.2841		0.412507	32.1857	67.4018
260-2204.6A	zoned plg phenocryst	50.8166	30.14	0.7819	14.1768	3.6471	0.0226		99.6433		0.129351	31.7247	68.1459
260-2204.6A	zoned plg phenocryst	49.7547	30.7644	0.7103	14.7856	3.2818	0.0171		99.3671		0.0981495	28.6281	71.2738
260-2204.6A	zoned plg phenocryst	50.4705	30.8276	0.6088	14.2965	3.5115	0.011		99.7562		0.0633836	30.7514	69.1852
260-2204.6A	zoned plg phenocryst	50.6757	30.5536	0.7765	14.3221	3.509	0.0079		99.8881		0.0454827	30.7037	69.2508
260-2204.6A	zoned plg phenocryst	50.1494	30.6213	0.5617	14.2661	3.4025	0.0525		99.1284		0.305145	30.0561	69.6388
260-2204.6A	zoned plg phenocryst	50.4071	30.6421	0.6862	14.2287	3.7449	0.0305		99.7593		0.17259	32.2066	67.6208
260-2204.6A	zoned plg phenocryst	49.5043	31.3132	0.5866	14.7954	3.1601	0.0238		99.4534		0.137952	27.8381	72.0239
260-2204.6A	zoned plg phenocryst	50.6006	30.122	0.6668	14.1405	3.752	0.0385		99.3564		0.218543	32.3689	67.4126
260-2204.6A	zoned plg phenocryst	50.504	29.6808	0.7705	13.6561	4.0156	0.0183		98.7079		0.104035	34.695	65.201
260-2204.6A	zoned plg phenocryst	49.2692	30.8448	0.6777	14.9237	3.1149	0.0158		98.9203		0.091417	27.3906	72.518
260-2204.6A	zoned plg phenocryst	49.5172	30.8565	0.7866	15.109	3.0411	0.0079		99.3362		0.0456147	26.6868	73.2676
260-2204.6A	zoned plg phenocryst	47.6851	32.4887	0.7486	16.5072	2.1944	0.0176		99.6455		0.10223	19.3717	80.5261
260-2204.6A	zoned plg phenocryst	53.0144	28.4054	1.0781	11.9443	4.9036	0.0405		99.4956		0.231107	42.5266	57.2423
260-2204.6A	zoned plag	50.1379	30.5678	0.5419	14.4419	3.5492	0.0232		99.3188		0.132222	30.7421	69.1256
260-2204.6A	zoned plag	50.1853	30.0987	0.7744	14.1763	3.6089	0.0079		98.8817		0.0454059	31.5245	68.4301
260-2204.6A	zoned plag	50.5055	30.0405	0.6227	14.2279	3.6197	0.0208		99.1613		0.119053	31.4873	68.3936
260-2204.6A	zoned plag	49.7014	30.1351	0.799	14.4802	3.3637	0.0269		98.5403		0.15549	29.5498	70.2947
260-2204.6A	zoned plag	49.2476	30.6808	0.9588	14.9095	3.1612	0.025		99.0947		0.144083	27.6894	72.1665
260-2204.6A	zoned plag	48.3552	30.8437	0.9038	15.682	2.7961	0.0371		98.5885		0.212521	24.3427	75.4448
260-2204.6A	zoned plag	53.4899	27.6471	0.8833	11.3259	5.398	0.0356		98.8332		0.200546	46.2153	53.5842
260-2204.6A	zoned plag	58.5036	24.6668	0.6394	7.5443	7.6123	0.0782		99.0945		0.434844	64.3325	35.2326
260-2204.6A	small zoned plag	51.2227	29.534	0.6384	13.2468	4.0792	0.0275		98.8865		0.15848	35.7277	64.1139
260-2204.6A	small zoned plag	51.0898	29.4972	0.8055	13.4536	4.0833	0.0165		98.9692		0.0941713	35.4188	64.487
260-2204.6A	small zoned plag	48.3912	31.031	0.8419	15.1754	2.8742	0.0073		98.377		0.0426389	25.5146	74.4428
260-2204.6A	small zoned plag	54.2294	27.7047	0.6393	11.3839	5.3972	0.0579		99.4908		0.324892	46.0275	53.6477
260-2204.6A	small zoned plag	61.8731	22.8666	0.4586	4.855	9.1227	0.126		99.3336		0.697359	76.7356	22.567
260-2204.6A	large zoned plg	49.7996	30.5669	0.4677	14.5003	3.3589	0.0336		98.815		0.194035	29.4799	70.3261
260-2204.6A	large zoned plg	50.2469	30.3762	0.5635	14.2645	3.4908	0.0458		99.059		0.264265	30.6116	69.1241
260-2204.6A	large zoned plg	50.3899	29.9952	0.5364	14.3885	3.6136	0.0978		99.0616		0.553359	31.0739	68.3727
260-2204.6A	large zoned plg	50.3409	30.0674	0.5335	14.2515	3.4561	0.0519		98.7294		0.300459	30.4083	69.2912
260-2204.6A	large zoned plg	50.1083	30.3535	0.5707	14.3203	3.5997	0.0532		99.0505		0.303119	31.1713	68.5255
260-2204.6A	large zoned plg	50.8583	29.8227	0.6258	13.9413	3.6721	0.055		98.984		0.317105	32.1768	67.5061
260-2204.6A	large zoned plg	50.2888	30.148	0.5324	14.1582	3.6457	0.0624		98.9656		0.356697	31.6726	67.9707
260-2204.6A	large zoned plg	50.723	29.7405	0.5177	14.1659	3.7179	0.066		98.9917		0.37471	32.0802	67.5451
260-2204.6A	large zoned plg	50.4355	30.3045	0.5745	14.314	3.5977	0.0795		99.3806		0.452506	31.1222	68.4253
260-2204.6A	large zoned plg	49.3512	31.1433	0.6398	15.1124	3.2097	0.0311		99.5255		0.176692	27.7145	72.1088
260-2204.6A	large zoned plg	49.1913	31.3153	0.6343	15.3272	2.9394	0.0433		99.5384		0.249093	25.6992	74.0517
260-2204.6A	large zoned plg	49.7577	30.2813	0.6903	14.544	3.3037	0.0311		98.687		0.180115	29.0788	70.741
260-2204.6A	large zoned plg	50.329	30.294	0.7062	14.5735	3.4536	0.0348		99.4325		0.198595	29.9536	69.8478
260-2204.6A	large zoned plg	49.3715	30.7501	0.7589	15.0022	3.1378	0.022		99.0761		0.126507	27.4223	72.4512
260-2204.6A	large zoned plg	47.8858	31.0674	0.7156	15.664	2.5628	0.1022		98.0342		0.595832	22.7078	76.6963
260-2204.6A	large zoned plg	53.6651	27.9562	0.936	12.2618	5.0759	0.0559		100.072		0.309382	42.6957	56.9949
260-2204.6A	large zoned plg	54.7818	27.5261	0.8449	10.6964	5.4804	0.056		99.4865		0.322424	47.9556	51.722
260-2204.6A	large zoned plg	57.1704	26.05	0.8684	9.1489	6.5079	0.0828		99.9358		0.468931	56.0153	43.5157
260/2207.7	plg2 c-r	52.9154	28.7285	0.7203	12.7819	4.2408	0.1329		99.5712		0.767636	37.2277	62.0047
260/2207.7	plg2 c-r	52.8409	28.5126	0.7495	12.8389	4.3418	0.1682		99.5497		0.958428	37.6003	61.4413
260/2207.7	plg2 c-r	52.6196	28.926	0.7709	12.5235	4.2295	0.1691		99.3046		0.988027	37.558	61.454
260/2207.7	plg2 c-r	52.9114	28.5454	0.7445	12.4774	4.4338	0.1803		99.3814		1.03633	38.7318	60.2319
260/2207.7	plg2 c-r	54.5736	27.6832	0.6108	11.1913	5.1844	0.2075		99.5416		1.18668	45.0612	53.7521
260/2207.7	plg2 c-r	56.725	26.2931	0.625	9.3959	6.0709	0.2895		99.5418		1.66311	53.0045	45.3324
260/2207.7	plg2 c-r	58.3321	25.4688	0.5202	8.0388	6.7697	0.3483		99.5344		2.00307	59.1699	38.827
260/2207.7	plg3 r-r	58.6479	25.5557	0.4473	7.9831	6.8463	0.3786		99.9179		2.16489	59.4975	38.3376
260/2207.7	plg3 r-r	57.397	26.2632	0.5861	8.8728	6.3166	0.3254		99.8125		1.87257	55.2449	42.8825
260/2207.7	plg3 r-r	55.9085	26.6059	0.6516	10.0803	5.7197	0.2798		99.3643		1.60449	49.8484	48.5471
260/2207.7	plg3 r-r	54.7584	27.3829	0.8584	11.0455	5.181	0.2275		99.6001		1.30912	45.3105	53.3804
260/2207.7	plg3 r-r	54.2025	27.9478	0.7093	11.5984	4.9586	0.1796		99.6659		1.02884	43.1706	55.8005
260/2207.7	plg3 r-r	53.6958	27.9661	0.6982	11.8487	4.7728	0.1577		99.2133		0.90828	41.7781	57.3136
260/2207.7	plg3 r-r	53.2703	28.1504	0.6954	12.3141	4.5037	0.1781		99.1754		1.02564	39.4174	59.557
260/2207.7	plg3 r-r	52.5974	28.8287	0.7771	13.0279	4.1733	0.133		99.5665		0.763621	36.4161	62.8203
260/2207.7	plg3 r-r	52.5006	29.1507	0.6966	12.9848	3.9898	0.1343		99.5157		0.785231	35.4536	63.7611
260/2207.7	plg3 r-r	52.1982	29.1234	0.6726	13.7364	3.9268	0.1277		99.8671		0.724247	33.8472	65.4286
260/2207.7	plg3 r-r	51.5388	29.0721	0.6485	13.7833	3.7404	0.0972		98.9377		0.559982	32.7502	66.6899
260/2207.7	plg3 r-r	51.7241	29.5196	0.5831	13.901	3.7795	0.1281		99.6726		0.730044	32.7357	66.5342
260/2207.7	plg3 r-r	52.0507	29.3602	0.6788	13.4186	3.7139	0.1179		99.4258		0.692233	33.1403	66.1675
260/2207.7	plg3 r-r	51.4935	29.3753	0.5868	13.5507	3.8456	0.1321		99.064		0.76107	33.6724	65.5666
260/2207.7	plg3 r-r	51.8519	29.0034	0.5907	13.3286	3.9191	0.1279		98.8484		0.740242	34.4729	64.7869
260/2207.7	plg3 r-r	52.0425	28.8626	0.6675	13.271	3.9259	0.1346		98.9351		0.780435	34.5954	64.6241
260/2207.7	plg3 r-r	52.1094	28.945	0.6702	13.3744	4.0673	0.1409		99.3488		0.802628	35.2126	63.9848
260/2207.7	plg3 r-r	52.4721	28.885	0.6425	13.0635	4.167	0.1521		99.4733		0.871312	36.279	62.8497
260/2207.7	plg3 r-r	53.0199	28.318	0.6563	12.4793	4.5672	0.1566		99.271		0.890859	39.4871	59.622
260/2207.7	plg3 r-r	54.4294	27.5477	0.774	11.0742	5.0472	0.1865		99.1579		1.08696	44.7069	54.2061
260/2207.7	plg3 r-r	57.0599	26.2241	0.6544	9.4224	6.1665	0.2967		99.9358		1.68753	53.304	45.0084
260/2207.7	plg3 r-r	57.3826	25.6764	0.6569	9.0162	6.3837	0.2965		99.5356		1.68747	55.2168	43.0957
260/2207.7	plg4 c-r	51.4387	29.4363	0.673	14.3247	3.5801	0.0931		99.6084		0.530041	30.9772	68.4927
260/2207.7	plg4 c-r	51.2286	29.6366	0.5979	13.9962	3.5315	0.1072		99.162		0.622206	31.152	68.2258
260/2207.7	plg4 c-r	51.3386	29.6593	0.6592	14.2395	3.6221	0.1104		99.6267		0.628192	31.3236	68.0482
260/2207.7	plg4 c-r	51.312	29.6918	0.7485	13.5551	3.8118	0.1217		99.3566		0.703506	33.4885	65.808
260/2207.7	plg4 c-r	55.7333	26.6928	0.6829	10.3792	5.5201	0.2344		99.3153		1.35173	48.38	50.2683
260/2207.7	plg4 c-r	56.4291	26.3652	0.775	9.8874	6.0007	0.2948		99.8453		1.66379	51.4708	46.8654
260/2210.3	plg2	51.8388	28.2766	0.6669	13.1704	4.1955	0.126		98.3054		0.717399	36.3046	62.978
260/2210.3	plg2	51.8134	28.3362	0.7532	13.0323	4.2607	0.1364		98.3673		0.776901	36.8825	62.3406
260/2210.3	plg2	52.2501	28.1995	0.6709	13.0223	4.0899	0.1413		98.4256		0.817053	35.9425	63.2404
260/2210.3	plg2	52.1021	28.3009	0.6316	12.7001	4.2618	0.1413		98.1327		0.817494	37.4734	61.7091
260/2210.3	plg2	51.8501	28.0536	0.7153	12.8828	4.3	0.1584		98.0096		0.904465	37.3158	61.7797
260/2210.3	plg2	52.3298	27.7827	0.7395	12.6221	4.3438	0.1617		98.0574		0.931235	38.0196	61.0492
260/2210.3	plg2	53.498	27.5221	0.7472	11.9133	4.6469	0.1691		98.5906		0.98104	40.9727	58.0463
260/3008.2	plg4 c-r	47.1105	31.5886	0.5478	16.5359	2.4085	0.0503		98.2738		0.285822	20.8	78.9142
260/3008.2	plg4 c-r	47.4555	32.0171	0.4962	16.5965	2.3204	0.072		99.0195		0.41056	20.1092	79.4803
260/3008.2	plg4 c-r	47.3145	31.9759	0.5072	16.1919	2.4285	0.0558		98.5113		0.3217	21.2786	78.3997
260/3008.2	plg4 c-r	47.2553	31.8325	0.4981	16.5997	2.3329	0.078		98.6231		0.444072	20.1856	79.3703
260/3008.2	plg4 c-r	47.56	31.8056	0.429	16.3228	2.3963	0.1003		98.666		0.574758	20.8695	78.5557
260/3008.2	plg4 c-r	47.275	31.9535	0.3521	16.2731	2.3758	0.0744		98.3614		0.428768	20.8088	78.7624
260/3008.2	plg4 c-r	47.7604	31.8604	0.4827	16.5059	2.451	0.0493		99.1426		0.27953	21.1209	78.5995
260/3008.2	plg4 c-r	47.7699	31.356	0.4797	16.455	2.4472	0.0983		98.6499		0.557344	21.0876	78.355
260/3008.2	plg4 c-r	48.1826	31.3772	0.5083	15.8947	2.7166	0.065		98.7851		0.370523	23.535	76.0944
260/3008.2	plg4 c-r	47.8186	31.6106	0.4724	16.01	2.5849	0.0787		98.5681		0.450921	22.5091	77.04
260/3008.2	plg4 c-r	48.1956	30.913	0.4427	15.8028	2.7026	0.0811		98.2109		0.464479	23.5242	76.0113
260/3008.2	plg4 c-r	48.6993	30.8741	0.4867	15.6022	2.8435	0.0789		98.6295		0.450757	24.6892	74.8601
260/3008.2	plg4 c-r	48.6562	31.1018	0.524	15.8022	2.7178	0.0728		98.9033		0.416602	23.6371	75.9463
260/3008.2	plg4 c-r	47.6344	31.7942	0.3818	16.2875	2.5231	0.0751		98.7007		0.426979	21.8016	77.7714
260/3008.2	plg4 c-r	48.1565	31.2684	0.4098	16.2622	2.6175	0.0655		98.8507		0.370029	22.4734	77.1566
260/3008.2	plg4 c-r	48.193	31.3527	0.4567	16.3686	2.5869	0.0655		99.0852		0.369135	22.157	77.4738
260/3008.2	plg4 c-r	48.0827	31.468	0.4828	16.0243	2.5674	0.0806		98.7686		0.462143	22.3729	77.1649
260/3008.2	plg4 c-r	47.8404	31.3947	0.4447	16.4371	2.527	0.078		98.7912		0.440102	21.6697	77.8902
260/3008.2	plg4 c-r	47.7943	31.6849	0.4309	16.5763	2.2965	0.0996		98.9569		0.568774	19.9313	79.5
260/3008.2	plg4 c-r	47.9541	32.2052	0.451	16.4693	2.3287	0.0589		99.4924		0.337928	20.3054	79.3567
260/3008.2	plg4 c-r	47.3234	31.5811	0.4445	16.8303	2.3073	0.0773		98.659		0.43626	19.7906	79.7732
260/3008.2	plg4 c-r	48.125	31.2946	0.5313	16.3323	2.5649	0.0936		99.0055		0.528564	22.0131	77.4584
260/3008.2	plg4 c-r	47.7634	31.6476	0.5255	16.4632	2.4619	0.054		99.0493		0.306433	21.2324	78.4611
260/3008.2	plg4 c-r	47.878	31.6595	0.4785	16.48	2.314	0.0583		98.9278		0.334754	20.1934	79.4719
260/3008.2	plg4 c-r	47.4693	31.8499	0.5429	16.6472	2.2631	0.0875		98.873		0.49977	19.6451	79.8551
260/3008.2	plg4 c-r	47.6389	31.9315	0.4374	16.7869	2.3528	0.0631		99.2272		0.355748	20.1598	79.4845
260/3008.2	plg4 c-r	50.5541	29.6885	0.5373	14.0089	3.7445	0.1394		98.7157		0.792243	32.3428	66.865
260/3008.2	plg4 c-r	50.2766	30.5325	0.4571	15.08	3.3261	0.1031		99.8663		0.578467	28.3624	71.0591
260/3008.2	plg4 c-r	50.4747	30.0026	0.6106	14.3976	3.5119	0.1134		99.198		0.646428	30.4255	68.9281
260/3008.2	plg4 c-r	50.1387	29.9348	0.4351	14.3179	3.3734	0.1339		98.4041		0.774632	29.66	69.5654
260/3008.2	plg4 c-r	50.8604	29.8464	0.4673	14.4883	3.7754	0.128		99.5664		0.709778	31.8173	67.4729
260/3008.2	plg4 c-r	49.3137	30.5422	0.5376	15.1416	2.9858	0.1108		98.6726		0.638057	26.1317	73.2302
260/3008.2	plg4 c-r	50.8873	29.6606	0.5003	14.458	3.6077	0.1496		99.3343		0.841628	30.8466	68.3118
260/3008.2	plg4 c-r	51.1687	29.782	0.5062	13.8713	3.6584	0.1504		99.2248		0.86635	32.0276	67.106
260/3008.2	plg4 c-r	51.1892	29.2265	0.6458	13.5465	3.9245	0.148		98.733		0.846225	34.1033	65.0505
260/3008.2	plg4 c-r	52.4534	28.6676	0.6863	12.7151	4.4005	0.1049		99.0917		0.600406	38.2789	61.1207
260/3008.2	plg2 c-r	50.315	29.8608	0.5717	14.3019	3.4836	0.0707		98.685		0.406872	30.4687	69.1244
260/3008.2	plg2 c-r	50.6123	30.319	0.4448	14.4425	3.5568	0.1102		99.5958		0.624529	30.635	68.7404
260/3008.2	plg2 c-r	50.4406	29.6809	0.5233	14.0899	3.7093	0.1132		98.6252		0.643769	32.06	67.2962
260/3008.2	plg2 c-r	49.7577	29.967	0.5198	14.4651	3.4002	0.1065		98.2598		0.611276	29.6606	69.7281
260/3008.2	plg2 c-r	51.2513	29.729	0.4922	13.7251	3.9932	0.0782		99.3696		0.442457	34.3378	65.2197
260/3008.2	plg2 c-r	50.342	30.0923	0.4583	14.2146	3.5151	0.0944		98.7635		0.543318	30.7473	68.7093
260/3008.2	plg2 c-r	50.7668	29.3834	0.5434	13.9677	3.7248	0.2017		98.662		1.14645	32.1767	66.6768
260/3008.2	plg2 c-r	51.0675	29.3896	0.6383	13.6923	3.994	0.1212		98.9681		0.685105	34.3124	65.0025
260/3008.2	plg2 c-r	51.6346	28.6759	0.6578	13.1744	4.1898	0.1183		98.5461		0.674057	36.2822	63.0438
260/3008.2	plg2 c-r	52.9034	28.3208	0.783	12.359	4.6705	0.0669		99.1817		0.38131	40.4579	59.1608
260/3008.2	plg3 c-r	50.0304	30.4169	0.6103	14.3896	3.4784	0.1325		99.1346		0.756969	30.2016	69.0415
260/3008.2	plg3 c-r	49.8707	30.1751	0.4525	14.5937	3.2994	0.0811		98.5844		0.467382	28.8984	70.6342
260/3008.2	plg3 c-r	49.8682	30.7294	0.4785	14.9461	3.0779	0.0944		99.2851		0.544889	27.0009	72.4542
260/3008.2	plg3 c-r	54.1873	28.1548	0.7496	11.6849	5.0672	0.0981		100.053		0.556983	43.7249	55.7181
260/3008.2	plg3 c-r	61.7539	23.1316	0.5801	5.3323	8.5949	0.1285		99.6954		0.727247	73.9277	25.345
260/3008.2	plg3 c-r	65.3093	21.2651	0.623	2.5463	10.2184	0.1294		100.304		0.727053	87.2575	12.0155
260/3008.2	plg3 c-r	66.9869	19.9451	0.5749	1.178	11.0582	0.2225		100.168		1.23487	93.2744	5.49078
260/3025-3030	plagioclase close to crack/vein	47.6206	33.6776	0.3361	16.8762	2.2199	0.0164		100.74		0.0933749	19.2091	80.6975
260/3025-3030	groundmass plg	56.4002	26.5899	1.3412	9.416	6.299	0.0653		100.116		0.372153	54.5592	45.0686
260/3025-3030	groundmass plg	54.7763	27.2136	1.7177	10.5603	5.731	0.0461		100.036		0.261559	49.4181	50.3203
260/3025-3030	plg phenocryst c-r lne	51.6585	29.2326	0.6531	13.7014	3.9714	0.1245		99.3633		0.704692	34.1634	65.1319
260/3025-3030	plg phenocryst c-r lne	52.3509	29.5673	0.5613	12.9904	4.3611	0.129		99.9009		0.730177	37.5165	61.7533
260/3025-3030	plg phenocryst c-r lne	52.6525	29.2243	0.5202	13.0591	4.3585	0.1394		99.9277		0.78619	37.3585	61.8553
260/3025-3030	plg phenocryst c-r lne	52.2638	29.1563	0.5965	12.7854	4.4375	0.137		99.4269		0.777575	38.2779	60.9446
260/3025-3030	plg phenocryst c-r lne	49.651	31.1084	0.5551	15.1696	3.2337	0.045		99.7498		0.254242	27.7665	71.9792
260/3025-3030	plg phenocryst c-r lne	52.3906	29.5608	0.5888	12.9962	4.4648	0.1309		100.191		0.734102	38.0545	61.2114
260/3025-3030	plg phenocryst c-r lne	49.9244	30.8825	0.6984	14.6066	3.4615	0.0701		99.6348		0.398337	29.894	69.7076
260/3025-3030	plg phenocryst c-r lne	50.4815	30.624	0.8101	14.2726	3.7294	0.0573		99.9813		0.323509	32.0006	67.6759
260/3025-3030	plg phenocryst c-r lne	52.125	29.8515	0.5652	13.4366	3.9415	0.1283		100.037		0.737218	34.4206	64.8422
260/3025-3030	plg phenocryst c-r lne	50.7024	30.5767	0.5594	14.1642	3.581	0.0921		99.6714		0.528392	31.224	68.2476
260/3025-3030	plg phenocryst c-r lne	51.483	30.2161	0.581	13.6705	3.729	0.1356		99.8305		0.784538	32.7895	66.426
260/3025-3030	plg phenocryst c-r lne	51.3635	30.2875	0.6024	13.708	3.7429	0.1349		99.8611		0.778151	32.8131	66.4087
260/3025-3030	plg phenocryst c-r lne	51.2393	30.0256	0.6632	14.1852	3.7563	0.1165		100.014		0.656756	32.183	67.1603
260/3025-3030	plg phenocryst c-r lne	50.8807	30.2992	0.7025	13.9892	3.5171	0.1342		99.5272		0.778952	31.0264	68.1947
260/3025-3030	plg phenocryst c-r lne	51.1532	29.9943	0.7928	13.9703	3.884	0.0976		99.8792		0.550374	33.287	66.1626
260/3025-3030	plg phenocryst c-r lne	51.4122	30.2308	0.7182	13.7142	3.9494	0.0849		100.121		0.482249	34.0944	65.4234
260/3025-3030	plg phenocryst c-r lne	51.7972	30.0774	0.6888	13.6032	4.1818	0.1154		100.433		0.644855	35.5146	63.8405
260/3025-3030	plg phenocryst c-r lne	49.9708	30.7212	0.6141	14.4646	3.5186	0.1085		99.3736		0.616333	30.3769	69.0067
260/3025-3030	plg phenocryst c-r lne	51.0267	30.4178	0.6966	14.063	3.6526	0.0879		100.043		0.503728	31.8125	67.6838
260/3025-3030	plg phenocryst c-r lne	51.4944	29.6698	0.7358	13.6411	4.1724	0.105		99.8536		0.586506	35.4207	63.9928
260/3025-3030	r-r plag (not zoned)	52.8889	28.4821	1.2862	12.3157	4.6998	0.0667		99.8049		0.379997	40.6932	58.9268
260/3025-3030	r-r plag (not zoned)	51.0381	30.5955	0.6457	13.8566	3.7768	0.058		99.9883		0.332657	32.9215	66.7458
260/3025-3030	r-r plag (not zoned)	51.8008	30.2248	0.634	13.9375	3.7701	0.058		100.414		0.331558	32.7546	66.9138
260/3025-3030	r-r plag (not zoned)	50.8819	30.3337	0.7007	14.1667	3.7189	0.0628		99.8845		0.356562	32.0906	67.5528
260/3025-3030	r-r plag (not zoned)	50.6842	30.6239	0.7908	14.1039	3.6734	0.0604		99.9739		0.345373	31.9233	67.7313
260/3025-3030	r-r plag (not zoned)	50.1642	30.5359	0.9533	14.4082	3.6039	0.0701		99.7531		0.397213	31.036	68.5668
260/3025-3030	r-r plag B (not zoned)	50.9632	29.8241	0.6537	13.8561	3.9694	0.0818		99.3548		0.460806	33.9843	65.5549
260/3025-3030	r-r plag B (not zoned)	50.0128	30.557	0.6516	14.3483	3.595	0.0823		99.2119		0.467711	31.0502	68.4821
260/3025-3030	r-r plag B (not zoned)	50.6013	29.6642	0.7362	13.5535	3.8107	0.1203		98.5103		0.69559	33.4873	65.8171
260/3025-3030	r-r plag B (not zoned)	50.4817	30.4366	1.134	13.9003	3.8106	0.0458		99.8089		0.261546	33.0722	66.6662
260-3045-50	plagioclase c-r line	51.7287	28.955	0.6725	13.1459	3.9854	0.2173		98.7592		1.25499	34.9817	63.7633
260-3045-50	plagioclase c-r line	51.6113	29.0418	0.6961	12.9898	4.026	0.1603		98.5836		0.932603	35.5979	63.4695
260-3045-50	plagioclase c-r line	51.5102	28.9757	0.7091	13.5192	3.9353	0.1421		98.8607		0.813068	34.2214	64.9655
260-3045-50	plagioclase c-r line	52.9039	28.1283	0.8195	12.1207	4.616	0.1983		98.8124		1.1401	40.3342	58.5257
260-3045-50	plagioclase c-r line	58.5962	24.6215	0.5756	7.3342	7.348	0.4889		98.979		2.74416	62.6825	34.5733
260-3045-50	plagioclase c-r line	63.2953	21.5915	0.3841	3.3522	8.8964	1.2961		98.8438		7.35075	76.6823	15.967
260-3045-50	plagioclase c-r	49.6255	29.8134	0.606	14.4722	3.4225	0.1148		98.1707		0.657099	29.7728	69.5701
260-3045-50	plagioclase c-r	51.1615	29.3526	0.5497	13.7442	3.6895	0.148		98.754		0.855575	32.4154	66.729
260-3045-50	plagioclase c-r	50.7566	29.783	0.5872	14.3471	3.4414	0.118		99.129		0.678255	30.0631	69.2586
260-3045-50	plagioclase c-r	50.3656	29.6695	0.692	14.1366	3.4263	0.0961		98.4585		0.559503	30.3174	69.1231
260-3045-50	plagioclase c-r	50.3641	29.4547	0.5705	14.1425	3.6099	0.1392		98.3568		0.79529	31.3451	67.8596
260-3045-50	plagioclase c-r	51.1677	28.7778	0.6963	13.2295	3.9414	0.1916		98.0795		1.108	34.6402	64.2518
260-3045-50	plagioclase c-r	51.6371	28.5342	0.6446	12.8469	4.1161	0.1921		98.0644		1.11445	36.2917	62.5938
260-3045-50	plagioclase c-r	52.6449	27.7354	0.7222	12.1773	4.7137	0.2063		98.2742		1.17234	40.7104	58.1173
274-1800.8	plg1 core	50.6023	29.612	0.725229	14.1685	3.48384	0.143814		98.8072		0.829374	30.5434	68.6272
274-1800.8	STDEV on 7 analyses	0.2806	0.441455	0.0644008	0.443296	0.194994	0.0231269
274-1800.8	plg1 rim	51.6523	28.9684	0.6623	13.2523	4.03371	0.169643		98.7998		0.974429	35.1707	63.8549
274-1800.8	STDEV on 7 analyses	0.467254	0.198484	0.0845151	0.259703	0.129601	0.0340828
274-1800.8	plg2 core	49.5612	30.2722	0.708214	14.8157	3.18484	0.135743		98.7274		0.779469	27.7862	71.4343
274-1800.8	STDEV on 16 analyses	0.71603	0.486705	0.0791733	0.4785	0.254624	0.0313724
274-1800.8	plg2 rim	53.0146	28.2102	0.785357	12.4288	4.47029	0.271557		98.912		1.55088	38.7973	59.6518
274-1800.8	STDEV on 6 analyses	0.584434	0.726687	0.0780094	0.719677	0.43481	0.041113
277-280	plag c-r	52.19	29.5027	0.5972	13.394	3.9981	0.2128		100.006		1.21336	34.6466	64.14
277-280	plag c-r	52.4483	29.573	0.6986	13.0443	4.0862	0.29		100.172		1.66138	35.5777	62.761
277-280	plag c-r	52.2344	29.2901	0.6578	13.0493	4.0328	0.248		99.5539		1.43051	35.3536	63.2158
277-280	plag c-r	52.384	29.7444	0.6447	13.1394	4.2735	0.233		100.456		1.31172	36.5642	62.124
277-280	plag c-r	53.4673	27.8369	1.3829	11.9784	4.6804	0.1739		99.5898		1.00247	41.0055	57.9921
277-280	plag c-r	52.952	28.9478	0.6751	12.4642	4.549	0.2487		99.862		1.41064	39.2143	59.3751
277-280	plag c-r	53.4929	28.5064	0.652	12.0446	4.8795	0.331		99.9833		1.85305	41.5166	56.6304
277-280	plag c-r	54.1875	28.1893	0.6665	11.3532	5.1062	0.3348		99.9458		1.89902	44.0179	54.0831
277-280	plag c-r	55.6778	27.1995	0.6952	10.0707	5.5741	0.4441		99.7466		2.5562	48.7614	48.6824
277-280	plag c-r	58.9882	25.1188	0.4711	7.5251	7.3292	0.4553		99.8696		2.54156	62.1796	35.2789
274-1800.8	plg1 core	52.3142	29.4553	0.6512	13.1625	4.03903	0.250267		99.9107		1.43508	35.1926	63.3723
274-1800.8	STDEV on 16 analyses	0.121995	0.147294	0.0510212	0.200472	0.0443795	0.0386499		0.319899		0.224041	0.48594	0.702695
277-280	plag2 c-r	50.6928	30.0505	0.6552	14.2638	3.2879	0.2189		99.2006		1.27303	29.0602	69.6668
277-280	plag2 c-r	50.7258	30.0066	0.7405	14.1592	3.5106	0.2389		99.4043		1.36781	30.5478	68.0844
277-280	plag2 c-r	50.1468	30.0171	0.6365	14.2284	3.4878	0.2157		98.8185		1.23496	30.3489	68.4161
277-280	plag2 c-r	50.793	30.3133	0.7722	13.945	3.339	0.2272		99.4319		1.33541	29.8271	68.8375
277-280	plag3 c-r	53.9244	27.9004	0.6592	11.8229	4.782	0.3436		99.5352		1.95887	41.4334	56.6078
277-280	plag3 c-r	53.6287	28.2432	0.6088	12.0197	4.6959	0.3827		99.6238		2.17267	40.5175	57.3098
277-280	plag3 c-r	53.9972	28.0394	0.667	11.7781	4.7793	0.3349		99.6883		1.91478	41.5294	56.5558
277-280	plag3 c-r	54.0777	27.5495	0.7011	11.2777	4.9787	0.3315		99.0019		1.9085	43.5624	54.5291
277-280	plag3 c-r	58.2908	25.2996	0.539	8.4265	6.9605	0.2992		99.8511		1.66641	58.9181	39.4155
277-280	plag3 c-r	65.4136	21.0492	0.2962	1.9719	9.635	1.4183		99.7987		8.00498	82.6479	9.34709
277-280	plag4 c-r	52.6993	28.8545	0.6064	13.0899	4.299	0.3026		99.897		1.69717	36.6447	61.6582
277-280	plag4 c-r	51.8271	28.9473	0.6753	13.0429	3.9297	0.2863		98.753		1.66331	34.6975	63.6392
277-280	plag4 c-r	51.2075	29.3655	0.7061	13.2287	3.853	0.2334		98.5867		1.35703	34.0469	64.5961
277-280	plag4 c-r	57.6742	25.6938	0.7263	9.2731	6.5434	0.2678		100.302		1.48774	55.2469	43.2654
277-300	plag c-r	53.9555	27.9266	0.5591	11.8741	4.784	0.2836		99.4782		1.6181	41.4837	56.8982
277-300	plag c-r	53.2313	28.3047	0.6749	12.1744	4.6082	0.2986		99.3727		1.70368	39.9592	58.3371
277-300	plag c-r	52.389	28.4682	0.7668	12.7563	4.2969	0.2347		99.0048		1.3428	37.3628	61.2944
277-300	plag c-r	52.6306	28.3484	0.6788	12.5583	4.5	0.2177		99.0163		1.23666	38.8502	59.9132
277-300	plag c-r	59.8521	24.5198	0.4699	7.0994	7.468	0.4023		99.8824		2.27101	64.0709	33.6581
277-300	plag1 c-r	51.1718	29.8368	0.5759	13.6506	3.702	0.1994		99.2143		1.15326	32.5407	66.3061
277-300	plag1 c-r	51.5375	29.8345	0.5416	13.8259	3.8636	0.1969		99.8569		1.11366	33.2114	65.6749
277-300	plag1 c-r	51.3046	29.6534	0.6244	13.8445	3.8565	0.1669		99.5072		0.945327	33.1976	65.857
277-300	plag1 c-r	51.6086	29.2461	0.6282	13.4552	3.8661	0.2204		99.1056		1.26693	33.7755	64.9576
277-300	plag1 c-r	52.4275	28.9997	0.5943	12.9336	4.3203	0.2213		99.5612		1.25386	37.2022	61.5439
277-300	plag1 c-r	52.6903	28.5181	0.5498	12.9884	4.2479	0.2391		99.2887		1.35827	36.6748	61.967
277-300	plag1 c-r	52.7276	28.5798	0.538	12.637	4.3233	0.2676		99.1005		1.53341	37.6509	60.8157
277-300	plag1 c-r	52.9296	28.1344	0.6365	12.2988	4.5808	0.2462		98.8479		1.40387	39.698	58.8981
277-300	plag1 c-r	56.1562	26.899	0.6673	9.7347	6.1522	0.3393		100.026		1.89924	52.3375	45.7632
277-300	plag1 c-r	60.837	23.5733	0.569	5.6373	8.4422	0.5198		99.5958		2.87424	70.9465	26.1793
277-300	plag2 c-r	51.1395	29.1886	0.6226	13.3917	3.9409	0.1898		98.5327		1.08917	34.3702	64.5407
277-300	plag2 c-r	52.207	29.2615	0.6075	12.7334	4.1528	0.2434		99.2544		1.4111	36.5904	61.9985
277-300	plag2 c-r	54.0838	27.8114	0.622	11.6658	5.0349	0.2879		99.5734		1.62312	43.1408	55.2361
277-300	plag2 c-r	54.4374	27.0142	0.6725	10.8705	5.285	0.3613		98.7397		2.06186	45.8379	52.1003
277-300	plag2 c-r	55.9363	27.0178	0.6926	10.0953	5.8278	0.3483		100.038		1.96959	50.0858	47.9446
277-300	plag2 c-r	58.9046	24.9013	0.6711	7.6189	7.5047	0.4096		100.139		2.24882	62.6205	35.1307
277-300	palg3 c-r	47.2688	32.5722	0.474	16.8261	1.9717	0.069		99.1737		0.401235	17.4252	82.1735
277-300	palg3 c-r	47.357	32.646	0.5526	16.9322	1.9872	0.0824		99.5736		0.475669	17.4344	82.0899
277-300	palg3 c-r	48.7588	31.6103	0.5101	16.0446	2.5874	0.1339		99.674		0.763345	22.4177	76.8189
277-300	palg3 c-r	50.9054	30.3918	0.4722	14.4913	3.4835	0.1781		99.995		1.00948	30.008	68.9826
277-300	palg3 c-r	51.6304	29.61	0.5308	13.7518	3.8237	0.2146		99.6059		1.22103	33.0651	65.7139
277-300	palg3 c-r	51.3579	29.5532	0.5692	13.5135	3.9167	0.1864		99.1296		1.06586	34.0378	64.8963
277-300	palg3 c-r	52.3336	29.3448	0.5671	13.3793	3.9098	0.2056		99.7774		1.18268	34.1811	64.6362
277-300	palg3 c-r	52.2715	28.8217	0.5974	12.8033	4.1404	0.2452		98.9512		1.41811	36.3932	62.1887
277-300	palg3 c-r	52.8074	29.0459	0.5796	12.7537	4.2329	0.2547		99.7944		1.46388	36.9744	61.5617
277-300	palg3 c-r	53.1598	28.913	0.5854	12.5183	4.5722	0.2319		100.073		1.3106	39.272	59.4174
277-440	plg2 r-r	51.9444	29.0445	0.62	12.8304	4.3827	0.2582		99.067		1.4592	37.6434	60.8974
277-440	plg2 r-r	53.8724	27.8634	0.4682	11.1652	5.0749	0.384		98.8016		2.19756	44.1393	53.6631
277-440	plg2 r-r	54.0617	27.5993	0.4344	10.9556	5.0922	0.3939		98.5723		2.27241	44.6471	53.0805
277-440	plg2 r-r	47.7208	31.93	0.4973	16.3621	2.3389	0.1075		98.9742		0.617681	20.4247	78.9576
277-440	plg2 r-r	51.1723	29.7295	0.5213	13.7346	3.8638	0.2585		99.2734		1.46329	33.2409	65.2958
277-440	plg2 r-r	54.0152	26.9786	0.9062	10.7192	5.1664	0.3592		98.1559		2.08672	45.6147	52.2986
277-440	plag 1 c-r	52.7676	28.9051	0.4286	12.3809	4.4149	0.2323		99.1096		1.33967	38.6952	59.9652
277-440	plag 1 c-r	54.2885	27.4317	0.4471	11.2366	5.2826	0.325		99.0226		1.82682	45.1281	53.0451
277-440	plag 1 c-r	54.4395	28.046	0.4233	11.2605	5.2184	0.3537		99.7678		1.99361	44.7023	53.3041
277-440	plag 1 c-r	55.0821	27.081	0.4949	10.2469	5.6719	0.319		98.8695		1.81818	49.1319	49.0499
277-440	plag 1 c-r	54.4195	27.1582	0.457	11.0052	5.3136	0.3209		98.6877		1.81924	45.7823	52.3984
277-440	plag 1 c-r	50.3384	30.2911	0.4251	14.2415	3.4943	0.1566		98.9844		0.898559	30.4721	68.6293
277-440	plag 1 c-r	50.896	29.977	0.3892	13.9451	3.8341	0.1742		99.2355		0.983458	32.8972	66.1193
277-440	plag 1 c-r	50.7342	29.2523	0.961	13.394	3.6151	0.1895		98.1394		1.11914	32.4477	66.4332
277-440	plag 1 c-r	50.0062	30.6992	0.4627	14.5433	3.2421	0.1456		99.0924		0.842248	28.5031	70.6546
277-440	plag 1 c-r	49.8962	30.3363	0.4408	14.7071	3.3611	0.1775		98.9058		1.00638	28.9624	70.0312
277-440	plag 1 c-r	51.3008	29.5427	0.3357	13.2617	4.1714	0.2006		98.8482		1.13474	35.862	63.0033
277-440	plag 1 c-r	52.0555	29.6761	0.4588	13.3838	3.9616	0.1957		99.7051		1.12105	34.4899	64.389
277-440	plag 1 c-r	51.564	29.6901	0.4212	13.3747	4.0303	0.2048		99.3269		1.1661	34.8765	63.9574
277-440	plag 1 c-r	52.0825	29.4009	0.441	13.0957	4.1322	0.2243		99.4008		1.28151	35.8808	62.8377
277-440	plag 1 c-r	52.4942	29.0279	0.4153	12.5996	4.2401	0.2282		98.9987		1.32259	37.3485	61.3289
277-440	plag 1 c-r	53.4131	28.1957	0.4314	11.6007	4.757	0.2854		98.7317		1.65374	41.8922	56.4541
277-440	plag 1 c-r	55.3322	27.0816	0.4036	10.397	5.5859	0.3209		99.0947		1.8293	48.3945	49.7762
277-440	plag 1 c-r	55.1911	27.0022	0.4534	10.3241	5.4517	0.3631		98.8032		2.09651	47.8399	50.0636
277-440	plag 1 c-r	55.1667	26.6605	0.4931	10.1434	5.7213	0.354		98.5391		2.01501	49.4945	48.4905
277-440	kfeld in pocket	63.4991	18.3519	0.1788	-0.014	0.055	16.7704		98.8165		99.5735	0.496308
277-440	kfeld in pocket	63.7998	17.8187	0.2318	0.0494	0.4222	15.8595		98.1134		95.8704	3.87883	0.250796
277-440	kfeld in pocket	64.3696	17.9578	0.1949	0.094	1.5736	14.4265		98.6062		85.379	14.1538	0.467215
277-495	plagioclase line (orientation?)	53.0531	28.8396	0.4838	12.1979	4.527	0.4389		99.5162		2.49895	39.1733	58.3278
277-495	plagioclase line (orientation?)	52.7002	29.0354	0.5289	12.5075	4.2819	0.3817		99.3743		2.19447	37.4138	60.3917
277-495	plagioclase line (orientation?)	47.564	32.1332	0.493	16.4189	2.2246	0.1363		99.0094		0.787561	19.5357	79.6768
277-495	plagioclase line (orientation?)	52.3738	29.1491	-0.0671	13.2497	4.1389	0.3338		99.1761		1.88037	35.4348	62.6848
277-495	plagioclase line (orientation?)	50.685	29.8691	0.5999	14.0066	3.6301	0.2753		99.0244		1.56815	31.4259	67.0059
277-495	plagioclase line (orientation?)	48.9417	31.4065	0.497	15.4899	2.7989	0.1809		99.3149		1.03704	24.3856	74.5773
277-495	plagioclase line (orientation?)	54.6815	28.3187	0.4169	11.0401	5.7481	0.1199		100.305		0.661413	48.191	51.1476
277-495	plagioclase line (orientation?)	49.1282	31.2093	0.5702	15.4406	2.7715	0.1762		99.2959		1.01521	24.269	74.7158
277-495	plagioclase line (orientation?)	49.0479	30.7326	0.6196	15.2277	2.9569	0.172		98.772		0.985401	25.746	73.2686
277-495	plagioclase line (orientation?)	48.6915	31.3145	0.6096	15.3092	2.8888	0.1756		98.9957		1.00784	25.1984	73.7937
277-495	plagioclase line (orientation?)	49.0261	31.3339	0.5525	15.3709	2.8267	0.2254		99.3441		1.29313	24.6465	74.0604
277-495	plagioclase line (orientation?)	48.798	31.1063	0.5623	15.428	2.9539	0.1911		99.0046		1.08348	25.4533	73.4632
277-495	plagioclase line (orientation?)	48.6471	30.9574	0.5661	15.7491	2.8206	0.1766		98.8688		0.998295	24.2325	74.7692
277-495	plagioclase line (orientation?)	49.2303	30.6689	0.5782	14.688	3.0997	0.2448		98.5275		1.41573	27.2444	71.3398
277-495	plagioclase line (orientation?)	47.4905	32.2347	0.5877	16.5749	2.242	0.1207		99.244		0.691752	19.5284	79.7798
277-495	plagioclase line (orientation?)	47.5356	31.5824	0.5503	16.0028	2.6579	0.1836		98.4756		1.03946	22.8698	76.0907
277-495	plagioclase line (orientation?)	51.0594	29.9306	0.5585	14.0655	3.7617	0.309		99.689		1.73217	32.0482	66.2196
277-495	plagioclase line (orientation?)	52.3059	28.9016	0.5746	12.6755	4.3606	0.4173		99.2138		2.35896	37.4633	60.1778
277-495	plagioclase line (orientation?)	52.9515	28.5068	0.5489	12.0535	4.722	0.4504		99.2332		2.53747	40.4311	57.0314
277-495	plagioclase line (orientation?)	53.4733	27.8452	0.636	11.4716	4.9632	0.4746		98.8354		2.68864	42.7321	54.5793
277-515	plag grain1 c-r	49.8108	30.1201	0.4553	14.1634	3.3715	0.2356		98.2109		1.36543	29.6964	68.9382
277-515	plag grain1 c-r	50.3836	30.5794	0.5827	14.6942	3.1913	0.2481		99.7627		1.42266	27.8119	70.7654
277-515	plag grain1 c-r	49.1779	30.8935	0.5522	15.0597	2.9947	0.2349		99.0333		1.34736	26.1061	72.5465
277-515	plag grain1 c-r	49.295	30.7689	0.5766	15.0128	2.935	0.2356		98.888		1.36148	25.777	72.8615
277-515	plag grain1 c-r	49.0673	30.4205	0.5544	15.2012	2.8614	0.2184		98.4065		1.25996	25.0884	73.6517
277-515	plag grain1 c-r	48.6675	30.9382	0.6207	15.1458	2.8036	0.2007		98.4171		1.1681	24.7991	74.0328
277-515	plag grain1 c-r	48.9625	31.2113	0.5686	15.1547	2.7537	0.2112		98.956		1.23336	24.4401	74.3266
277-515	plag grain1 c-r	48.2581	31.7311	0.5844	15.8245	2.6075	0.1822		99.2153		1.04501	22.7292	76.2258
277-515	plag grain1 c-r	48.1044	31.4929	0.5765	15.8657	2.3805	0.1627		98.5965		0.951166	21.1507	77.8981
277-515	plag grain1 c-r	51.7801	29.2344	0.5404	13.0116	3.9813	0.4162		99.0583		2.39268	34.7853	62.8221
277-515	plag grain1 c-r	52.6429	28.9608	0.5734	12.9869	4.1298	0.3985		99.7837		2.26653	35.6984	62.035
277-515	plag grain1 c-r	52.3362	29.0945	0.6469	12.3314	4.1248	0.4149		99.0462		2.43482	36.7887	60.7765
277-515	plag grain1 c-r	52.5279	28.8995	0.5436	12.6604	4.4173	0.4155		99.6132		2.3393	37.7972	59.8635
277-515	plag grain1 c-r	52.849	28.3946	0.5584	12.1309	4.4784	0.4561		98.9926		2.61368	39.0035	58.3828
277-515	plag grain1 c-r	53.0739	29.0136	0.6687	12.4547	4.372	0.4485		100.133		2.5551	37.8542	59.5907
277 2380-85	plag grain 4	51.0672	29.8257	0.542	13.7296	3.6736	0.4159		99.2247		2.37253	31.8495	65.7779
277 2380-85	plag grain 4	51.5059	30.3682	0.45	13.6448	3.7878	0.2804		100.095		1.60259	32.9019	65.4955
277 2380-85	plag grain 4	50.649	30.6532	0.4562	14.6196	3.3171	0.2085		99.9711		1.18952	28.7616	70.0489
277 2380-85	plag grain 4	51.3228	29.9528	0.545	13.5757	3.7243	0.3058		99.4602		1.76076	32.5908	65.6484
277 2380-85	plag grain 4	51.711	29.6499	0.5766	13.3927	3.8317	0.2763		99.5073		1.59273	33.5693	64.838
277 2380-85	plag grain 4	55.0017	27.8745	0.551	11.1225	5.1235	0.4595		100.256		2.61267	44.2744	53.1129
277 2380-85	plag grain 4	54.7962	27.2518	0.3662	10.499	5.4116	0.2499		98.5965		1.44518	47.5629	50.9919
277 2380-85	plag in olivine grain 6	52.3613	29.0644	0.7896	12.8522	4.1678	0.3833		99.7294		2.18886	36.1721	61.639
277 2380-85	plag in olivine grain 6	48.823	31.5043	0.85	15.6952	2.4257	0.1531		99.4826		0.899465	21.6588	77.4417
277 2380-85	plag in olivine grain 6	51.6785	29.7432	0.6066	13.5534	3.741	0.3349		99.7262		1.92435	32.6697	65.4059
277 2380-85	plag in olivine grain 6	49.4069	31.9237	0.7336	15.2761	2.8574	0.2327		100.489		1.33698	24.9509	73.7121
277 2380-85	glomeroporphyritic plg grain 6	49.8669	31.383	0.6211	14.8019	2.8895	0.1999		99.8177		1.17432	25.7978	73.0279
277 2380-85	glomeroporphyritic plg grain 6	50.0618	31.3322	0.3798	14.5308	3.1541	0.1963		99.6858		1.14171	27.8803	70.9779
277 2380-85	glomeroporphyritic plg grain 6	48.7953	31.4095	0.5804	15.7105	2.5719	0.1487		99.2282		0.861936	22.6572	76.4809
277 2380-85	glomeroporphyritic plg grain 6	48.9764	31.4239	0.631	15.6957	2.5211	0.1866		99.4699		1.08488	22.2765	76.6387
277 2380-85	glomeroporphyritic plg grain 6	49.0965	31.4483	0.5585	15.5778	2.5756	0.1695		99.4569		0.987368	22.8021	76.2105
277-2420.6	plag c-r line	49.1194	31.0371	0.537	15.4085	2.9465	0.1551		99.2191		0.882556	25.4815	73.636
277-2420.6	plag c-r line	48.7566	31.5149	0.4047	15.6696	2.6503	0.1076		99.2097		0.622124	23.2888	76.089
277-2420.6	plag c-r line	48.3224	31.3802	0.4816	16.1515	2.4525	0.1039		98.9509		0.597265	21.4263	77.9764
277-2420.6	plag c-r line	48.2489	31.2398	0.5359	16.183	2.5025	0.105		98.8573		0.600016	21.7338	77.6662
277-2420.6	plag c-r line	49.0666	31.58	0.4811	15.7816	2.6858	0.1362		99.7543		0.779525	23.3622	75.8582
277-2420.6	plag c-r line	48.6575	31.4692	0.4311	15.825	2.4947	0.1216		99.0363		0.706829	22.0387	77.2544
277-2420.6	plag c-r line	48.8893	31.4344	0.4717	15.5677	2.6302	0.123		99.1571		0.715331	23.2476	76.0371
277-2420.6	plg2 c-r line	48.3286	31.4037	0.4593	15.7691	2.6619	0.1314		98.7954		0.754281	23.2229	76.0228
277-2420.6	plg2 c-r line	48.4198	31.126	0.4774	16.2263	2.4202	0.1496		98.8553		0.857041	21.0722	78.0708
277-2420.6	plg2 c-r line	48.3622	31.4973	0.4655	15.7897	2.6785	0.1535		98.9483		0.877885	23.2814	75.8407
277-2420.6	plag c-r line	51.488	30.0587	0.4614	14.1899	3.568	0.2386		100.025		1.35733	30.8481	67.7945
277-2420.6	plag c-r line	53.5427	28.5022	0.4939	12.073	4.3913	0.2767		99.4003		1.61907	39.0515	59.3295
277-2420.6	plg2 c-r line	48.3286	31.4037	0.4593	15.7691	2.6619	0.1314		98.7954		0.754281	23.2229	76.0228
277-2420.6	plg2 c-r line	48.4198	31.126	0.4774	16.2263	2.4202	0.1496		98.8553		0.857041	21.0722	78.0708
277-2420.6	plg2 c-r line	48.3622	31.4973	0.4655	15.7897	2.6785	0.1535		98.9483		0.877885	23.2814	75.8407
277-2420.6	plg2 c-r line	50.7765	30.1307	0.4636	14.4546	3.3496	0.2091		99.4572		1.199	29.1909	69.6101
277-2420.6	plg2 c-r line	53.4748	28.2948	0.4235	12.146	4.6127	0.3236		99.386		1.84548	39.98	58.1745
277-2420.6	plg3 c-r line	50.6982	30.0295	0.4628	14.7247	3.3863	0.2178		99.5699		1.22837	29.0259	69.7457
277-2420.6	plg3 c-r line	49.7512	31.0532	0.5113	14.9894	3.2603	0.2031		99.781		1.14443	27.9205	70.9351
277-2420.6	plg3 c-r line	50.0308	30.8613	0.5021	14.9199	3.3364	0.1937		99.897		1.08852	28.4953	70.4162
277-2420.6	plg3 c-r line	49.951	30.8745	0.5376	14.7444	3.139	0.1641		99.4854		0.947581	27.5478	71.5046
277-2420.6	plg3 c-r line	48.4583	31.6762	0.5985	15.7068	2.6097	0.1088		99.1808		0.630129	22.9709	76.3989
277-2420.6	plg3 c-r line	48.5073	32.04	0.5639	16.4971	2.4268	0.0964		100.181		0.546496	20.9089	78.5446
277-2420.6	plg3 c-r line	51.4931	29.7729	0.4518	13.5668	3.8797	0.2367		99.4341		1.35048	33.6416	65.008
277-2420.6	plg3 c-r line	52.7669	29.0376	0.4155	12.6982	4.301	0.2932		99.553		1.67596	37.3644	60.9596
277-2420.6	plg3 c-r line	53.1344	28.8905	0.3751	12.4854	4.5724	0.3031		99.868		1.70876	39.1765	59.1147
277-2420.6	plg3 c-r line	53.9981	28.6595	0.466	11.8177	4.8748	0.3068		100.191		1.73917	41.9983	56.2625
277-2420.6	plg2 c-r line	53.5099	28.5799	0.4379	11.741	4.7515	0.3722		99.4385		2.13244	41.3732	56.4943
277-2420.6	plg2 c-r line	55.6239	27.1784	0.4457	10.5917	5.406	0.3723		99.7082		2.12941	46.9926	50.878
277-2420.6	plg2 c-r line	55.9542	27.0379	0.529	10.43	5.6058	0.3871		100.037		2.19116	48.2256	49.5833
277-2420.6	plag c-r line	54.3034	28.0367	0.5108	11.3109	5.1302	0.3375		99.7629		1.91394	44.2157	53.8704
		54.1844	28.2029	0.454286	11.5821	4.94881	0.338886		99.7942		1.92726	42.7638	55.309
277 2945-2950	plagioclase grain 4	54.5062	27.4827	0.4923	11.3032	5.1407	0.2928		99.2176		1.66377	44.3948	53.9414
277 2945-2950	plagioclase grain 4	54.3486	27.6412	0.4891	11.3049	4.9143	0.3125		99.0926		1.80891	43.233	54.9581
277 2945-2950	plagioclase grain 4	54.671	27.6714	0.5056	11.2426	4.9625	0.2874		99.3729		1.66402	43.6676	54.6684
277 2945-2950	plagioclase grain 4	54.0389	28.01	0.497	11.7017	4.8731	0.2256		99.3758		1.29214	42.4194	56.2885
277 2945-2950	plagioclase grain 4	53.4847	28.2089	0.5071	11.9705	4.6671	0.2298		99.1032		1.3225	40.8206	57.8569
277 2945-2950	plagioclase grain 4	54.5687	27.969	0.4228	11.3919	5.0249	0.2806		99.6901		1.60481	43.6769	54.7182
277 2945-2950	plagioclase grain 5	55.0281	27.3851	0.481	10.4795	5.6875	0.3496		99.407		1.96464	48.5758	49.4596
277 2945-2950	plagioclase grain 5	54.7258	27.2691	0.5032	10.9052	5.2397	0.3195		99.0849		1.83184	45.6573	52.5108
277 2945-2950	plagioclase grain 5	55.0532	27.5382	0.6468	10.7288	5.4937	0.2782		99.8156		1.57727	47.3371	51.0856
277 2945-2950	plagioclase grain 5	54.9662	27.8784	0.6023	10.8171	5.4975	0.3203		100.167		1.80348	47.0443	51.1522

## Sheet: REEBOX PRO parameters
		source lithology	source chemistry	TP (°C)	half spreading rate	Lithosphere (km)	mixing function	F max peridotite	F max pyroxenite	Proportion of peridotite melt	Proportion of pyroxenite melt	crust production (km)	DMM isotopes		Crustal component isotopes		Pooled melt isotopes
													87Sr/86Sr	143Nd/144Nd	87Sr/86Sr	143Nd/144Nd	87Sr/86Sr	143Nd/144Nd
70	Model A	peridotite+harzburgite+pyroxenite MIX1G	68DMM 30 harz 2UCC (MIX1G)	1450	0	50	Active LANG	0.17	0.48	0.92	0.08	6.87	0.7028	0.51275	0.71	0.5116
70a		peridotite+harzburgite+pyroxenite MIX1G	68DMM 30 harz 2UCC (MIX1G)	1500	0	50	Active LANG	0.2	0.75	0.9	0.1	11	0.7028	0.51275	0.71	0.5116
70b		peridotite+harzburgite+pyroxenite MIX1G	68DMM 30 harz 2UCC (MIX1G)	1550	0	50	Active LANG	0.23	1	0.89	0.11	16.4	0.7028	0.51275	0.71	0.5116
70c		peridotite+harzburgite+pyroxenite MIX1G	68DMM 30 harz 2UCC (MIX1G)	1600	0	50	Active LANG	0.27	1	0.9	0.1	22.44	0.7028	0.51275	0.71	0.5116
200	Model B	peridotite+harzburgite+pyroxenite MIX1G	68DMM 30 harz 2LCC (MIX1G)	1500	0	60	Active LANG	0.18	0.62	0.91	0.09	9	0.7028	0.51275	0.7057	0.512	0.704177	0.512422
90d	Model C	peridotite	98DMM2LCC	1500	0	80	Active LANG	0.11		1		4.9	0.7028	0.51275	0.7057	0.512	0.703916	0.512481
16	Model D	peridotite	DMM Workman & Hart 2005	1500	0	60	Active LANG	0.16		1		10	0.7028	0.51275

## Sheet: EC-AFC parameters
	Tuklonsky picrite		Picrite model B		Picrite model C		260-2225-30		Upper crust	avg gneiss leucogranite Proterozoic	Upper crust	metapelites	Lower crust	granulites udachnaya
										Czamanske et al. (2000)		Czamanske et al. (2000)		Koreshkova et al. (2011)
Magma liquidus T (°C)	1400	estimated (MCS)	1400	estimated (MCS)	1400	estimated (MCS)	1220 C at 3 kbar	estimated (MCS)
Magma initial T (°C)	1300	Ware et al. (2018)	1300	Ware et al. (2018)	1300	Ware et al. (2018)	1200	estimated
Assimilant liquidus T (°C)									1020	Estimated MCS	1020	Estimated MCS	1100	Bohrson e Spera (2001)
Assimilant initial T (°C)									400	Ware et al. (2018)	400	Ware et al. (2018)	800	Heinonen et al. (2016)
Assimilant solidus T (°C)									690	Estimated MELTS	690	Estimated MELTS	950	Bohrson e Spera (2001)
Equilibration T (°C)	900	estimated	900	estimated	950	estimated	900	estimated	900	estimated	900	estimated	1050	estimated
Isobaric specific heat magma (J/kg K)	1484	Bohrson e Spera (2001)	1484	Bohrson e Spera (2001)	1484	Bohrson e Spera (2001)	1484	Bohrson e Spera (2001)					1388	Bohrson e Spera (2001)
Crystallization enthalpy (J/kg)	396000	Bohrson e Spera (2001)	396000	Bohrson e Spera (2001)	396000	Bohrson e Spera (2001)	396000	Bohrson e Spera (2001)
Isobaric specific heat assimilant (J/kg K)									1370	Ware et al. (2018)	1370	Ware et al. (2018)
Fusion enthalpy (J/kg)									270000	Bohrson e Spera (2001)	270000	Bohrson e Spera (2001)	350000	Bohrson e Spera (2001)
Sr (ppm)	175 ppm	Yao and Mungall (2021)	69 ppm	REEBOX PRO model	107 ppm	REEBOX PRO model	196 ppm	this work	280 ppm	Czamanske et al. (2000)	233 ppm	Czamanske et al. (2000)	235 ppm	Koreshkova et al. (2011)
D Sr	0.35	GERM	0.35	GERM	0.35	GERM	0.35	GERM	1.5	GERM	1.5	GERM	0.7	GERM
(87Sr/86Sr)251Ma	0.7057	Wooden et al. (1993)	0.7041	REEBOX PRO model	0.7039	REEBOX PRO model	0.704553	this work	0.734	Czamanske et al. (2000)	0.7091	Czamanske et al. (2000)	0.7057	Koreshkova et al. (2011)
Nd (ppm)	6.9 ppm	Yao and Mungall (2021)	5 ppm	REEBOX PRO model	7.4 ppm	REEBOX PRO model	12.1 ppm	this work	16 ppm	Czamanske et al. (2000)	26 ppm	Czamanske et al. (2000)	14.3 ppm	Koreshkova et al. (2011)
D Nd	0.25	Heinonen et al. (2016)	0.25	Heinonen et al. (2016)	0.25	Heinonen et al. (2016)	0.25	Ware et al. (2018)	0.25	GERM; Heinonen et al. (2016)	0.25	GERM; Heinonen et al. (2016)	0.25	GERM; Heinonen et al. (2016)
(143Nd/144Nd)251Ma	0.512212	Yao and Mungall (2021)	0.512422	REEBOX PRO model	0.51248	REEBOX PRO model	0.512829	Workman e Hart (2005)	0.511515	Czamanske et al. (2000)	0.5123	Czamanske et al. (2000)	0.512	Koreshkova et al. (2011)
Compositions from Pang et al. (2013) used for crustal assimilation modeling
		Marlstone		Metapelite (avg)		Impure rock salt		Massive rock anhydrite
		MD56-23				MD56-19		MD48-13
SiO2	(wt%)	23.4999		57.8212		6.25773
TiO2	(wt%)	0.204758		0.233077		0.0617349
Al2O3	(wt%)	6.26545		21.2613		2.45066		0.799783
Fe2O3	(wt%)	2.78244		2.73522		0.794187
MnO	(wt%)	0.0439617		0.0381047
MgO	(wt%)	6.77562		1.76628		3.27291
CaO	(wt%)	23.2034		1.7987		7.44052		41.6144
Na2O	(wt%)	0.117748		6.91226		29.5483		0.289328
K2O	(wt%)	2.49042		2.13726		1.46035		0.797668
P2O5	(wt%)			0.28758
LOI(max)	(wt%)	16.51		3.55286		49.25
Total		81.8938		98.5439		100.536		43.5012
Rb	(ppm)	56		60.1857		19		6.4
Sr	(ppm)	2696		233.286		389		2498
Y	(ppm)	11.6		43.625		5.62		3.87
Zr	(ppm)	74.1		241		28.4		5.89
Nb	(ppm)	4.59		15.175		1.74		0.321
Cs	(ppm)	1.77		0.695		0.551		0.0367
Ba	(ppm)	137		102.615		28.8		13.4
La	(ppm)	8.86		19.175		3.22		3.84
Ce	(ppm)	18.7		45.25		7.07		8.09
Pr	(ppm)	2.22		6.03		0.927		1.06
Nd	(ppm)	8.65		26.4429		4.02		–
Sm	(ppm)	1.86		5.88857		1.03		–
Eu	(ppm)	0.439		1.28925		0.236		0.197
Gd	(ppm)	1.66		5.0245		0.145		0.109
Tb	(ppm)	0.265		2.1125		0.944		0.755
Dy	(ppm)	1.67		6.1175		0.839		0.649
Ho	(ppm)	0.355		1.2975		0.171		0.12
Er	(ppm)	1.06		3.7375		0.438		0.314
Yb	(ppm)	1		3.56		0.402		0.234
Lu	(ppm)	0.158		0.5575		0.0675		0.0307
Hf	(ppm)	1.69		5.3675		0.623		0.141
Ta	(ppm)	0.28		0.95625		0.107		0.0211
Pb	(ppm)	0.935		0.4025		2.84		0.212
Th	(ppm)	2.68		7.87		1.02		0.197
U	(ppm)	1.74		2.05625		0.879		0.079
(87Sr/86Sr)251Ma		0.7087		0.709129		0.7089		0.7086
(143Nd/144Nd)251Ma		0.5123		0.512314		0.5122

## Sheet: analytical batch 1
Report Number: A16-13817
Report Date: 16/1/2017
Analyte Symbol	SiO2	Al2O3	Fe2O3(T)	MnO	MgO	CaO	Na2O	K2O	TiO2	P2O5	LOI	Total	Sc	Be	V	Cr	Co	Ni	Cu	Zn	Ga	Ge	As	Rb	Sr	Y	Zr	Nb	Mo	Ag	In	Sn	Sb	Cs	Ba	La	Ce	Pr	Nd	Sm	Eu	Gd	Tb	Dy	Ho	Er	Tm	Yb	Lu
Unit Symbol	%	%	%	%	%	%	%	%	%	%	%	%	ppm	ppm	ppm	ppm	ppm	ppm	ppm	ppm	ppm	ppm	ppm	ppm	ppm	ppm	ppm	ppm	ppm	ppm	ppm	ppm	ppm	ppm	ppm	ppm	ppm	ppm	ppm	ppm	ppm	ppm	ppm	ppm	ppm	ppm	ppm	ppm	ppm
Detection Limit	0.01	0.01	0.01	0.001	0.01	0.01	0.01	0.01	0.001	0.01		0.01	1	1	5	20	1	20	10	30	1	0.5	5	1	2	0.5	1	0.2	2	0.5	0.1	1	0.2	0.1	2	0.05	0.05	0.01	0.05	0.01	0.005	0.01	0.01	0.01	0.01	0.01	0.005	0.01	0.002
Analysis Method	FUS-ICP	FUS-ICP	FUS-ICP	FUS-ICP	FUS-ICP	FUS-ICP	FUS-ICP	FUS-ICP	FUS-ICP	FUS-ICP	FUS-ICP	FUS-ICP	FUS-ICP	FUS-ICP	FUS-ICP	FUS-MS	FUS-MS	FUS-MS	FUS-MS	FUS-MS	FUS-MS	FUS-MS	FUS-MS	FUS-MS	FUS-ICP	FUS-MS	FUS-ICP	FUS-MS	FUS-MS	FUS-MS	FUS-MS	FUS-MS	FUS-MS	FUS-MS	FUS-ICP	FUS-MS	FUS-MS	FUS-MS	FUS-MS	FUS-MS	FUS-MS	FUS-MS	FUS-MS	FUS-MS	FUS-MS	FUS-MS	FUS-MS	FUS-MS	FUS-MS
260/2205.6	48.74	14.6	14.11	0.21	6.68	10.9	2.55	0.45	1.518	0.19	0.08	100.1	37	< 1	321	150	53	100	230	100	21	1.7	< 5	11	207	31.5	107	4.9	< 2	< 0.5	< 0.1	1	15.8	0.3	113	8.37	20.4	2.81	13.7	4.01	1.48	5.06	0.91	5.51	1.14	3.27	0.481	3.16	0.5
260/2206.2	48.28	14.76	13.9	0.185	6.46	11.19	2.95	0.36	1.589	0.17	0.28	100.1	37	< 1	321	160	51	100	210	70	21	1.6	< 5	8	241	30.7	114	4.6	< 2	< 0.5	< 0.1	1	6.4	0.2	99	7.74	19.5	2.79	12.9	4	1.44	4.76	0.86	5.49	1.14	3.17	0.462	2.91	0.454
260/2204.6	47.87	14.22	13.71	0.21	6.37	10.79	3.52	0.4	1.516	0.16	0.99	99.75	38	< 1	321	170	49	90	120	90	21	1.6	< 5	9	242	30.4	103	4.5	< 2	< 0.5	< 0.1	< 1	2.7	0.4	112	7.75	19.4	2.76	12.6	4.02	1.41	4.86	0.88	5.56	1.11	3.2	0.469	3.07	0.464
260/2209.0	48.68	13.86	14.67	0.197	6.09	11.08	3.06	0.37	1.592	0.16	0.16	99.92	41	< 1	333	160	49	60	200	60	20	1.5	< 5	7	239	31.4	108	4.4	< 2	< 0.5	< 0.1	< 1	2.8	0.2	95	7.65	19.6	2.73	13.1	4.29	1.42	5.15	0.88	5.82	1.17	3.32	0.496	3.19	0.487
219/1925.7	48.71	15.18	12.7	0.191	7.23	10.64	2.71	0.44	1.203	0.14	-0.05	99.11	35	< 1	288	140	51	120	120	90	19	1.6	< 5	11	219	25.4	87	3.8	< 2	< 0.5	< 0.1	< 1	2.2	0.3	139	7.99	18.7	2.52	11.7	3.43	1.21	3.99	0.72	4.46	0.89	2.59	0.386	2.55	0.394
219/1938.6	47.61	14.66	13.11	0.185	7.12	10.69	2.71	0.48	1.271	0.15	0.97	98.95	34	< 1	290	150	49	130	100	70	19	1.4	169	9	234	25.2	94	5.5	< 2	< 0.5	< 0.1	< 1	45.9	0.4	144	9.46	21.5	2.87	13	3.5	1.23	4.12	0.74	4.58	0.92	2.69	0.403	2.53	0.386
219/1973.5	49.37	14.69	13.16	0.198	6.5	11.22	2.53	0.43	1.202	0.13	-0.12	99.31	40	< 1	309	170	48	80	150	80	19	1.6	< 5	9	246	23.7	77	3.4	< 2	< 0.5	< 0.1	< 1	2.2	0.4	130	6.81	16.5	2.27	10.6	3.1	1.23	3.83	0.67	4.19	0.86	2.5	0.369	2.48	0.374
219/1973.9	50.39	14.6	14.68	0.211	5.13	10.04	2.88	0.75	1.631	0.18	0.01	100.5	36	< 1	335	60	45	60	170	100	21	1.5	< 5	17	246	32.7	126	5.3	< 2	< 0.5	< 0.1	1	2.2	0.6	200	10.8	25	3.42	15.6	4.26	1.51	5.21	0.92	5.75	1.17	3.37	0.502	3.15	0.49
219/1976.2	49.33	15.46	13.25	0.192	7.28	10.87	2.39	0.46	1.221	0.14	-0.55	100	35	< 1	290	140	52	120	160	90	19	1.6	< 5	12	218	25.2	88	3.9	< 2	< 0.5	< 0.1	1	15.4	0.3	139	7.8	18.6	2.53	11.6	3.31	1.22	4.02	0.72	4.63	0.93	2.66	0.387	2.56	0.393
219/1979.0	50.86	13.92	11.77	0.18	6.28	11.79	3.05	0.56	1.532	0.17	0.51	100.6	42	< 1	353	140	39	70	70	30	20	1.5	< 5	8	328	30.6	111	4.4	< 2	< 0.5	< 0.1	< 1	2.3	0.3	122	10.7	24.5	3.26	13.9	4.13	1.42	4.94	0.85	5.62	1.13	3.24	0.486	3.01	0.492
219/2002.25	49.74	15.94	11.81	0.173	7.05	11.02	2.43	0.52	1.148	0.15	-0.08	99.9	34	< 1	278	160	47	120	130	80	19	1.5	< 5	13	240	24.7	90	3.7	< 2	< 0.5	< 0.1	< 1	1	0.4	143	8.15	19.2	2.58	11.9	3.41	1.12	3.97	0.69	4.5	0.9	2.57	0.377	2.43	0.374
219/2010.0	48.71	15.93	13.31	0.195	8.6	10.58	2.22	0.45	1.128	0.13	-0.64	100.6	31	< 1	237	130	56	170	130	90	17	1.4	< 5	11	218	22.8	86	3.6	< 2	< 0.5	< 0.1	< 1	7	0.4	135	7.81	18.1	2.41	10.8	3.03	1.13	3.61	0.66	4.15	0.79	2.33	0.341	2.35	0.368
219/3891.7	50.41	13.25	11.43	0.186	7.87	12.64	2.2	0.4	1.094	0.11	0.01	99.59	51	< 1	329	130	44	80	120	70	16	1.7	< 5	11	203	23.6	74	3	< 2	< 0.5	< 0.1	< 1	1.5	0.4	102	6.64	15.6	2.2	10.1	2.82	1.04	3.56	0.64	4.19	0.86	2.43	0.351	2.29	0.365
219/3933.5	49.14	16.34	12.3	0.178	7.65	11.09	2.39	0.42	1.077	0.11	-0.29	100.4	33	< 1	252	170	48	140	130	70	18	1.4	< 5	10	222	22.6	80	3.5	< 2	< 0.5	< 0.1	< 1	5.2	0.2	129	7.35	17.1	2.27	10.5	2.84	1.03	3.43	0.62	3.98	0.81	2.29	0.338	2.31	0.35
Report Number: A16-13817
Report Date: 16/1/2017
Analyte Symbol	SiO2	Al2O3	Fe2O3(T)	MnO	MgO	CaO	Na2O	K2O	TiO2	P2O5	LOI	Total	Sc	Be	V	Cr	Co	Ni	Cu	Zn	Ga	Ge	As	Rb	Sr	Y	Zr	Nb	Mo	Ag	In	Sn	Sb	Cs	Ba	La	Ce	Pr	Nd	Sm	Eu	Gd	Tb	Dy	Ho	Er	Tm	Yb	Lu
Unit Symbol	%	%	%	%	%	%	%	%	%	%	%	%	ppm	ppm	ppm	ppm	ppm	ppm	ppm	ppm	ppm	ppm	ppm	ppm	ppm	ppm	ppm	ppm	ppm	ppm	ppm	ppm	ppm	ppm	ppm	ppm	ppm	ppm	ppm	ppm	ppm	ppm	ppm	ppm	ppm	ppm	ppm	ppm	ppm
Detection Limit	0.01	0.01	0.01	0.001	0.01	0.01	0.01	0.01	0.001	0.01		0.01	1	1	5	20	1	20	10	30	1	0.5	5	1	2	0.5	1	0.2	2	0.5	0.1	1	0.2	0.1	2	0.05	0.05	0.01	0.05	0.01	0.005	0.01	0.01	0.01	0.01	0.01	0.005	0.01	0.002
Analysis Method	FUS-ICP	FUS-ICP	FUS-ICP	FUS-ICP	FUS-ICP	FUS-ICP	FUS-ICP	FUS-ICP	FUS-ICP	FUS-ICP	FUS-ICP	FUS-ICP	FUS-ICP	FUS-ICP	FUS-ICP	FUS-MS	FUS-MS	FUS-MS	FUS-MS	FUS-MS	FUS-MS	FUS-MS	FUS-MS	FUS-MS	FUS-ICP	FUS-MS	FUS-ICP	FUS-MS	FUS-MS	FUS-MS	FUS-MS	FUS-MS	FUS-MS	FUS-MS	FUS-ICP	FUS-MS	FUS-MS	FUS-MS	FUS-MS	FUS-MS	FUS-MS	FUS-MS	FUS-MS	FUS-MS	FUS-MS	FUS-MS	FUS-MS	FUS-MS	FUS-MS
NIST 694 Meas	11.31	1.96	0.75	0.01	0.35	42.69	0.87	0.54	0.12	30.15					1607
NIST 694 Cert	11.2	1.8	0.79	0.0116	0.33	43.6	0.86	0.51	0.11	30.2					1740
DNC-1 Meas	47.21	18.71	9.75	0.15	10.07	11.49	1.91	0.22	0.48	0.08			31		155	280	58	250	100	70	15				147	16.8	36						0.9		105	3.9			4.9		0.6							2
DNC-1 Cert	47.15	18.34	9.97	0.150	10.13	11.49	1.890	0.234	0.480	0.070			31		148	270	57	247	100	70	15				144.0	18.0	38						0.96		118	3.6			5.20		0.59							2.0
GBW 07113 Meas	71.13	12.83	3.24	0.15	0.15	0.61	2.46	5.39	0.28	0.04			5	4	5										41		391								492
GBW 07113 Cert	72.8	13	3.21	0.14	0.16	0.59	2.57	5.43	0.3	0.05			5	4	5										43		403								506
LKSD-3 Meas																90	31	50	30	150			26	75		28			< 2	2		2		2.4		48.9	94.2		44.6	8	1.5			5				2.9	0.43
LKSD-3 Cert																87	30	47	35	152			27	78		30			2	2.7		3		2.3		52	90		44	8	1.5			4.9				2.7	0.4
TDB-1 Meas																240		80	340	160				21		36.4										18.1	41.3		25.2		2.2							3.4
TDB-1 Cert																251		92	323	155				23		36										17	41		23		2.1							3.4
W-2a Meas	52.72	15.64	10.81	0.17	6.36	11.09	2.23	0.62	1.07	0.15			36	< 1	270	100	43	70	110	80	18	1.3		20	205	21.1	90	7.2	< 2					0.9	174	10.6	25		13.6	3.4	1.1		0.63	3.9	0.79	2.3		2.1	0.33
W-2a Cert	52.4	15.4	10.7	0.163	6.37	10.9	2.14	0.626	1.06	0.13			36	1.3	262	92	43	70	110	80	17	1		21	190	24	94	7.9	0.6					0.99	182	10	23		13	3.3	1		0.63	3.6	0.76	2.5		2.1	0.33
SY-4 Meas	50.19	20.07	6.15	0.11	0.52	8.11	6.9	1.66	0.28	0.13			1	3	8										1190		534								345
SY-4 Cert	49.9	20.69	6.21	0.108	0.54	8.05	7.10	1.66	0.287	0.131			1.1	2.6	8.0										1191		517								340
CTA-AC-1 Meas																			60	40						280										> 2000	> 3000		1170	166	46.9	133	14.6					10.9	1.13
CTA-AC-1 Cert																			54.0	38.0						272										2176	3326		1087	162	46.7	124	13.9					11.4	1.08
BIR-1a Meas	47.77	15.54	11.18	0.17	9.55	13.47	1.79	0.01	0.96	0.03			43	< 1	325	380	53	180	130	80	16				109	15.3	14								7	0.7	2		2.6	1.1	0.53	1.9						1.6	0.23
BIR-1a Cert	47.96	15.50	11.30	0.175	9.700	13.30	1.82	0.030	0.96	0.021			44	0.58	310	370	52	170	125	70	16				110	16	18								6	0.63	1.9		2.5	1.1	0.55	2.0						1.7	0.3
NCS DC86312 Meas																										988										> 2000	177		1600			240	31.3	185	35.1	101	13.6	84.9	12.3
NCS DC86312 Cert																										976										2360	190		1600			225.0	34.6	183	36	96.2	15.1	87.79	11.96
NCS DC70009 (GBW07241) Meas																			990	100	17	10.5	63	502		139				1.6	1	> 1000	3.4	42		23.9	61.1	8	32.4	12.7		16.1	3.1	22	4.3	14.3	2.3	16	2.42
NCS DC70009 (GBW07241) Cert																			960	100	16.5	11.2	69.9	500		128				1.8	1.3	1701	3.1	41		23.7	60.3	7.9	32.9	12.5		14.8	3.3	20.7	4.5	13.4	2.2	14.9	2.4
OREAS 100a (Fusion) Meas																	17		180							138			25							271	495	48.3	159	25.2	3.82	22.4	3.66	24.2	5.04	16	2.42	15.9	2.37
OREAS 100a (Fusion) Cert																	18.1		169							142			24.1							260	463	47.1	152	23.6	3.71	23.6	3.80	23.2	4.81	14.9	2.31	14.9	2.26
OREAS 101a (Fusion) Meas																	48		440							177			21							815	1380	130	402	49.6	8.37			32.3	6.53	20.1	2.9	18.1	2.55
OREAS 101a (Fusion) Cert																	48.8		434							183			21.9							816	1396	134	403	48.8	8.06			33.3	6.46	19.5	2.90	17.5	2.66
OREAS 101b (Fusion) Meas																	45		420							176			20							811	1370	129	389	50	8.12		5.23	31.7	6.34	19.2	2.8	18.1	2.7
OREAS 101b (Fusion) Cert																	47		416							178			20.9							789	1331	127	378	48	7.77		5.37	32.1	6.34	18.7	2.66	17.6	2.58
JR-1 Meas																		< 20		30	17	2	17	253		44.3		14.4	3		< 0.1	3		20.8		19.9	48.1	5.9	23.8	5.65	0.31		0.96	6.22			0.67	4.75	0.71
JR-1 Cert																		1.67		30.6	16.1	1.88	16.3	257		45.1		15.2	3.25		0.028	2.86		20.8		19.7	47.2	5.58	23.3	6.03	0.30		1.01	5.69			0.67	4.55	0.71
219/1925.7 Orig	48.7	15.47	12.83	0.193	7.26	10.66	2.69	0.44	1.236	0.14	-0.05	99.59	35	< 1	288	140	52	120	120	90	19	1.6	< 5	11	223	25.6	88	3.8	< 2	< 0.5	< 0.1	< 1	1.4	0.3	138	7.99	18.9	2.54	11.6	3.52	1.25	4.08	0.71	4.45	0.88	2.59	0.379	2.51	0.389
219/1925.7 Dup	48.71	14.9	12.57	0.189	7.2	10.62	2.73	0.45	1.17	0.14	-0.05	98.63	35	< 1	288	140	50	120	120	90	19	1.6	< 5	10	214	25.2	86	3.8	< 2	< 0.5	< 0.1	< 1	2.9	0.3	140	8	18.5	2.5	11.8	3.34	1.17	3.91	0.73	4.47	0.9	2.59	0.392	2.59	0.399
Method Blank																< 20	< 1	< 20	< 10	< 30	< 1	< 0.5	< 5	< 1		< 0.5		< 0.2	< 2	< 0.5	< 0.1	< 1	< 0.2	< 0.1		< 0.05	< 0.05	< 0.01	< 0.05	< 0.01	< 0.005	< 0.01	< 0.01	< 0.01	< 0.01	< 0.01	< 0.005	< 0.01	< 0.002
[truncated: 8 more columns]

## Sheet: analytical batch 2
Report Number: A17-07653
Report Date: 16/8/2017
Analyte Symbol	SiO2	Al2O3	Fe2O3(T)	MnO	MgO	CaO	Na2O	K2O	TiO2	P2O5	LOI	Total	Sc	Be	V	Cr	Co	Ni	Cu	Zn	Ga	Ge	As	Rb	Sr	Y	Zr	Nb	Mo	Ag	In	Sn	Sb	Cs	Ba	La	Ce	Pr	Nd	Sm	Eu	Gd	Tb	Dy	Ho	Er	Tm	Yb	Lu
Unit Symbol	%	%	%	%	%	%	%	%	%	%	%	%	ppm	ppm	ppm	ppm	ppm	ppm	ppm	ppm	ppm	ppm	ppm	ppm	ppm	ppm	ppm	ppm	ppm	ppm	ppm	ppm	ppm	ppm	ppm	ppm	ppm	ppm	ppm	ppm	ppm	ppm	ppm	ppm	ppm	ppm	ppm	ppm	ppm
Detection Limit	0.01	0.01	0.01	0.001	0.01	0.01	0.01	0.01	0.001	0.01		0.01	1	1	5	20	1	20	10	30	1	0.5	5	1	2	0.5	1	0.2	2	0.5	0.1	1	0.2	0.1	2	0.05	0.05	0.01	0.05	0.01	0.005	0.01	0.01	0.01	0.01	0.01	0.005	0.01	0.002
Analysis Method	FUS-ICP	FUS-ICP	FUS-ICP	FUS-ICP	FUS-ICP	FUS-ICP	FUS-ICP	FUS-ICP	FUS-ICP	FUS-ICP	FUS-ICP	FUS-ICP	FUS-ICP	FUS-ICP	FUS-ICP	FUS-MS	FUS-MS	FUS-MS	FUS-MS	FUS-MS	FUS-MS	FUS-MS	FUS-MS	FUS-MS	FUS-ICP	FUS-MS	FUS-ICP	FUS-MS	FUS-MS	FUS-MS	FUS-MS	FUS-MS	FUS-MS	FUS-MS	FUS-ICP	FUS-MS	FUS-MS	FUS-MS	FUS-MS	FUS-MS	FUS-MS	FUS-MS	FUS-MS	FUS-MS	FUS-MS	FUS-MS	FUS-MS	FUS-MS	FUS-MS
219/1955.3	47.7	15.77	13.29	0.197	6.77	10.54	2.55	0.64	1.344	0.13	0.82	99.75	35	< 1	295	150	47	120	120	90	18	1.4	< 5	14	252	25.5	93	3.5	< 2	< 0.5	< 0.1	< 1	0.6	0.8	146	8.59	18.9	2.57	11.4	3.33	1.2	4.32	0.74	4.56	0.88	2.58	0.376	2.54	0.406
219/1952.5	47.51	15.93	13.26	0.189	7.16	10.66	2.89	0.57	1.288	0.13	0.91	100.5	35	< 1	292	160	46	130	50	80	18	1.4	< 5	10	238	24	89	3.3	3	< 0.5	< 0.1	< 1	0.4	0.5	131	7.89	18.3	2.42	11.1	3.19	1.15	3.98	0.7	4.24	0.85	2.45	0.358	2.36	0.378
219/3849.7	51.32	12.57	15.65	0.206	3.98	9.22	3.57	0.61	1.679	0.27	0.27	99.33	40	1	298	50	37	30	230	80	22	1.6	< 5	13	298	48.2	204	8	4	< 0.5	0.1	2	0.4	0.3	226	17.2	40.3	5.26	24.3	6.85	2.17	8.32	1.38	8.45	1.74	5.05	0.741	4.91	0.827
260/2207.7	47.96	14.48	14.32	0.199	6.25	11.16	3.16	0.34	1.621	0.16	0.53	100.2	38	< 1	334	140	46	90	160	100	19	1.3	< 5	7	225	30.3	108	4	< 2	< 0.5	< 0.1	< 1	0.5	0.2	88	7.67	18.8	2.61	12.9	3.95	1.35	4.98	0.87	5.43	1.1	3	0.434	2.88	0.455
260/2210.3	46.81	13.53	16.59	0.216	5.16	11.14	3.29	0.45	1.961	0.17	0.57	99.89	45	< 1	414	210	43	50	220	110	22	1.7	< 5	9	266	37.9	112	4.5	5	< 0.5	0.1	< 1	0.6	0.2	114	9.16	23.1	3.25	15.4	4.85	1.61	6.16	1.06	6.69	1.37	3.94	0.558	3.89	0.627
219/1952.8	50.3	16.54	8.5	0.087	6.96	9.08	3.66	1.39	1.366	0.14	2.14	100.2	38	< 1	302	150	21	90	< 10	< 30	17	1.4	< 5	12	766	24.8	95	3.5	< 2	< 0.5	< 0.1	< 1	0.5	0.3	115	7.2	17.9	2.42	11.4	3.4	1.11	3.98	0.71	4.48	0.9	2.47	0.359	2.45	0.397
219/2007.R	49.26	16.18	10.9	0.16	6.63	10.7	2.5	0.72	0.831	0.13	0.8	98.8	30	< 1	186	140	42	140	80	70	19	1.3	< 5	14	289	23.5	91	3.3	< 2	< 0.5	< 0.1	< 1	0.6	0.8	175	7.9	18.4	2.45	11.3	3.15	1.18	3.87	0.68	4.15	0.81	2.32	0.341	2.32	0.362
219/2002.25.X	42.9	15.73	2.78	0.032	1.84	9.11	11.4	0.99	0.482	0.02	14.78	100.1	10	< 1	69	120	5	< 20	< 10	< 30	10	< 0.5	< 5	6	1598	13.4	48	2	< 2	< 0.5	< 0.1	< 1	0.4	0.1	56	4.01	9.43	1.29	5.66	1.67	0.661	2.01	0.35	2.25	0.44	1.36	0.199	1.16	0.18
219/1957.5	48.52	15.78	11.18	0.135	7.13	10.02	3.54	0.81	1.273	0.11	1.51	99.99	35	< 1	282	130	47	120	30	< 30	18	1.3	< 5	8	457	24.6	89	3.8	< 2	< 0.5	< 0.1	< 1	0.4	0.3	126	7.06	16.9	2.33	10.9	3.32	1.06	4.16	0.69	4.28	0.9	2.55	0.358	2.35	0.377
219/2007.0A	50.57	12.65	15.45	0.189	3.7	6.44	4.01	2.29	2.725	0.45	1.3	99.78	35	2	420	40	35	40	10	30	23	1.7	< 5	32	729	72.4	293	13.7	4	0.7	0.1	2	0.6	0.5	349	28.8	66.3	8.66	38.8	10.5	2.3	12.3	2.05	12.4	2.55	7.26	1.07	6.7	1.07
219/1951.6	48.94	15.19	11.96	0.196	6.72	10.69	3.05	0.89	1.334	0.15	1.3	100.4	36	< 1	304	160	42	110	20	40	19	1.4	< 5	9	304	25.8	93	4.1	< 2	< 0.5	< 0.1	< 1	0.5	0.5	128	8.02	19.3	2.56	11.9	3.47	1.21	4.4	0.7	4.45	0.91	2.49	0.369	2.61	0.418
219/2007.0B	55.7	13.06	9.79	0.116	2.41	6.21	6.37	0.84	1.856	0.68	1.84	98.88	25	2	116	40	22	30	40	< 30	18	1.3	< 5	7	683	99.5	503	19.2	4	1.4	0.1	2	0.5	0.2	209	32.2	77.9	10.7	49.5	14.1	3.08	16.9	2.84	17.5	3.56	10.1	1.48	9.63	1.48
Report Number: A17-07653
Report Date: 16/8/2017
Analyte Symbol	SiO2	Al2O3	Fe2O3(T)	MnO	MgO	CaO	Na2O	K2O	TiO2	P2O5	Sc	Be	V	Cr	Co	Ni	Cu	Zn	Ga	Ge	As	Rb	Sr	Y	Zr	Nb	Mo	Ag	In	Sn	Sb	Cs	Ba	La	Ce	Pr	Nd	Sm	Eu	Gd	Tb	Dy	Ho	Er	Tm	Yb	Lu	Hf	Ta
Unit Symbol	%	%	%	%	%	%	%	%	%	%	ppm	ppm	ppm	ppm	ppm	ppm	ppm	ppm	ppm	ppm	ppm	ppm	ppm	ppm	ppm	ppm	ppm	ppm	ppm	ppm	ppm	ppm	ppm	ppm	ppm	ppm	ppm	ppm	ppm	ppm	ppm	ppm	ppm	ppm	ppm	ppm	ppm	ppm	ppm
Detection Limit	0.01	0.01	0.01	0.001	0.01	0.01	0.01	0.01	0.001	0.01	1	1	5	20	1	20	10	30	1	0.5	5	1	2	0.5	1	0.2	2	0.5	0.1	1	0.2	0.1	2	0.05	0.05	0.01	0.05	0.01	0.005	0.01	0.01	0.01	0.01	0.01	0.005	0.01	0.002	0.1	0.01
Analysis Method	FUS-ICP	FUS-ICP	FUS-ICP	FUS-ICP	FUS-ICP	FUS-ICP	FUS-ICP	FUS-ICP	FUS-ICP	FUS-ICP	FUS-ICP	FUS-ICP	FUS-ICP	FUS-MS	FUS-MS	FUS-MS	FUS-MS	FUS-MS	FUS-MS	FUS-MS	FUS-MS	FUS-MS	FUS-ICP	FUS-MS	FUS-ICP	FUS-MS	FUS-MS	FUS-MS	FUS-MS	FUS-MS	FUS-MS	FUS-MS	FUS-ICP	FUS-MS	FUS-MS	FUS-MS	FUS-MS	FUS-MS	FUS-MS	FUS-MS	FUS-MS	FUS-MS	FUS-MS	FUS-MS	FUS-MS	FUS-MS	FUS-MS	FUS-MS	FUS-MS
NIST 694 Meas	11.44	1.85	0.73	0.01	0.34	42.86	0.86	0.55	0.11	30.22			1605
NIST 694 Cert	11.2	1.8	0.79	0.0116	0.33	43.6	0.86	0.51	0.11	30.2			1740
DNC-1 Meas	47.5	18.81	10.4	0.15	10.13	11.55	1.91	0.22	0.5	0.08	32		154	270	58	270	100		14				153	17	40						1		106				5.1		0.59							2.2
DNC-1 Cert	47.15	18.34	9.97	0.150	10.13	11.49	1.890	0.234	0.480	0.070	31		148	270	57	247	100		15				144.0	18.0	38						0.96		118				5.20		0.59							2.0
GBW 07113 Meas	72.4	13.18	3.17	0.14	0.14	0.59	2.47	5.4	0.27	0.04	5	4	5										42		384								496
GBW 07113 Cert	72.8	13	3.21	0.14	0.16	0.59	2.57	5.43	0.3	0.05	5	4	5										43		403								506
LKSD-3 Meas														90	31	50	30	160			26			29			< 2	2.3		2	1	2.2		51.2	95		45.7	8.2	1.5			5.2				2.9	0.4	4.5	0.65
LKSD-3 Cert														87	30	47	35	152			27			30			2	2.7		3	1.3	2.3		52	90		44	8	1.5			4.9				2.7	0.4	4.8	0.7
TDB-1 Meas														250			340	160				21		36.3										17.3	40.8		24.7		2.1							3.3
TDB-1 Cert														251			323	155				23		36										17	41		23		2.1							3.4
W-2a Meas	52.02	15.32	10.82	0.17	6.22	10.95	2.18	0.61	1.08	0.13	35	< 1	271	100	45	80	120	80	18	1.6	< 5	21	202	23.1	94	7.2	< 2				0.8	0.9	172	10.9	23.7		13.7	3.5	1.1		0.67	3.8	0.82	2.3	0.34	2.2		2.5
W-2a Cert	52.4	15.4	10.7	0.163	6.37	10.9	2.14	0.626	1.06	0.13	36	1.3	262	92	43	70	110	80	17	1	1.2	21	190	24	94	7.9	0.6				0.79	0.99	182	10	23		13	3.3	1		0.63	3.6	0.76	2.5	0.38	2.1		2.6
SY-4 Meas	50.11	20.09	5.93	0.11	0.5	8.04	6.96	1.67	0.27	0.14	< 1	3	7										1194		553								348
SY-4 Cert	49.9	20.69	6.21	0.108	0.54	8.05	7.10	1.66	0.287	0.131	1.1	2.6	8.0										1191		517								340
CTA-AC-1 Meas																								293										> 2000	> 3000		1190	172	47.2	130	14					11.4	1.19	1.2	2.65
CTA-AC-1 Cert																								272										2176	3326		1087	162	46.7	124	13.9					11.4	1.08	1.13	2.65
BIR-1a Meas	48.15	15.64	11.33	0.17	9.38	13.6	1.82	0.02	0.96	0.04	43	< 1	324	370	54	170	130	70	16		< 5		107	16	14								7				2.5	1.1	0.51	2		2.7				1.7	0.29	0.6
BIR-1a Cert	47.96	15.50	11.30	0.175	9.700	13.30	1.82	0.030	0.96	0.021	44	0.58	310	370	52	170	125	70	16		0.44		110	16	18								6				2.5	1.1	0.55	2.0		4				1.7	0.3	0.60
NCS DC86312 Meas																								1000										> 2000	189		1660				32.3	198	36.4	102	14.1	92	12.8
NCS DC86312 Cert																								976										2360	190		1600				34.6	183	36	96.2	15.1	87.79	11.96
NCS DC70009 (GBW07241) Meas																	970	100	17	11	73	460		131					1	> 1000	2.9	41		25.5	62.2	8.1	33.6	12.7		15.3		21.5	4.2	13.4	2.2	16.2	2.31
NCS DC70009 (GBW07241) Cert																	960	100	16.5	11.2	69.9	500		128					1.3	1700	3.1	41		23.7	60.3	7.9	32.9	12.5		14.8		20.7	4.5	13.4	2.2	14.9	2.4
OREAS 100a (Fusion) Meas															18		170							129			24							282	497	49.1	158	25.2	3.78	21.9	3.49	24.5	4.96	15.3	2.39	16	2.37
OREAS 100a (Fusion) Cert															18.1		169							142			24.1							260	463	47.1	152	23.6	3.71	23.6	3.80	23.2	4.81	14.9	2.31	14.9	2.26
OREAS 101a (Fusion) Meas															47		430							181			20							870	1500	137	419	51.7	8.29			34.1	6.67	20.3	3	19.8	2.74
OREAS 101a (Fusion) Cert															48.8		430							183			21.9							816	1396	134	403	48.8	8.06			33.3	6.46	19.5	2.90	17.5	2.66
OREAS 101b (Fusion) Meas															45		420							189			21							830	1440	131	393	51	8.41		5.48	32.6	6.46	19.3	2.82	18.6	2.79
OREAS 101b (Fusion) Cert															47		420							178			21							789	1331	127	378	48	7.77		5.37	32.1	6.34	18.7	2.66	17.6	2.58
JR-1 Meas																< 20			17		16	232		43		14.8	4		< 0.1	2	1.2	20.1		21.6	50.2		25	5.96	0.29		0.98				0.65	4.96		4.3	1.74
JR-1 Cert																1.67			16.1		16.3	257		45.1		15.2	3.25		0.028	2.86	1.19	20.8		19.7	47.2		23.3	6.03	0.30		1.01				0.67	4.55		4.51	1.86
Method Blank	< 0.01	< 0.01	0.01	0.002	0.02	0.01	< 0.01	< 0.01	0.001	< 0.01	< 1	< 1	< 5	< 20	< 1	< 20	< 10	< 30	< 1	< 0.5	< 5	< 1	< 2	< 0.5	2	< 0.2	< 2	< 0.5	< 0.1	< 1	< 0.2	< 0.1	3	< 0.05	< 0.05	< 0.01	< 0.05	< 0.01	< 0.005	< 0.01	< 0.01	< 0.01	< 0.01	< 0.01	< 0.005	< 0.01	< 0.002	< 0.1	< 0.01
[truncated: 8 more columns]

## Sheet: analytical batch 3
Report Number: A18-09178
Report Date: 5/9/2018
Analyte Symbol	SiO2	Al2O3	Fe2O3(T)	MnO	MgO	CaO	Na2O	K2O	TiO2	P2O5	LOI	Total	Sc	Be	V	Cr	Co	Ni	Cu	Zn	Ga	Ge	As	Rb	Sr	Y	Zr	Nb	Mo	Ag	In	Sn	Sb	Cs	Ba	La	Ce	Pr	Nd	Sm	Eu	Gd	Tb	Dy	Ho	Er	Tm	Yb	Lu
Unit Symbol	%	%	%	%	%	%	%	%	%	%	%	%	ppm	ppm	ppm	ppm	ppm	ppm	ppm	ppm	ppm	ppm	ppm	ppm	ppm	ppm	ppm	ppm	ppm	ppm	ppm	ppm	ppm	ppm	ppm	ppm	ppm	ppm	ppm	ppm	ppm	ppm	ppm	ppm	ppm	ppm	ppm	ppm	ppm
Detection Limit	0.01	0.01	0.01	0.001	0.01	0.01	0.01	0.01	0.001	0.01		0.01	1	1	5	20	1	20	10	30	1	0.5	5	1	2	0.5	1	0.2	2	0.5	0.1	1	0.2	0.1	2	0.05	0.05	0.01	0.05	0.01	0.005	0.01	0.01	0.01	0.01	0.01	0.005	0.01	0.002
Analysis Method	FUS-ICP	FUS-ICP	FUS-ICP	FUS-ICP	FUS-ICP	FUS-ICP	FUS-ICP	FUS-ICP	FUS-ICP	FUS-ICP	FUS-ICP	FUS-ICP	FUS-ICP	FUS-ICP	FUS-ICP	FUS-MS	FUS-MS	FUS-MS	FUS-MS	FUS-MS	FUS-MS	FUS-MS	FUS-MS	FUS-MS	FUS-ICP	FUS-MS	FUS-ICP	FUS-MS	FUS-MS	FUS-MS	FUS-MS	FUS-MS	FUS-MS	FUS-MS	FUS-ICP	FUS-MS	FUS-MS	FUS-MS	FUS-MS	FUS-MS	FUS-MS	FUS-MS	FUS-MS	FUS-MS	FUS-MS	FUS-MS	FUS-MS	FUS-MS	FUS-MS
219 1285-1300	51.53	14.66	13.33	0.208	5.76	10.61	2.74	0.59	1.325	0.2	-0.26	100.7	38	< 1	293	180	45	80	180	90	20	1.4	< 5	14	198	32.5	107	4.7	< 2	< 0.5	< 0.1	1	< 0.2	0.4	191	10.4	24.5	3.42	15.4	4.76	1.65	5.39	0.96	5.91	1.19	3.5	0.508	3.26	0.495
219 1410-1415	49.71	14.38	12.74	0.197	9.6	11.41	2.02	0.35	0.919	0.02	-0.77	100.6	39	< 1	247	460	59	170	130	80	16	1.4	< 5	10	176	19.2	62	2.3	< 2	< 0.5	< 0.1	< 1	< 0.2	0.3	92	4.28	10.3	1.57	7.41	2.58	0.886	3.06	0.54	3.38	0.69	1.99	0.295	1.99	0.306
219 1440-1445	50.23	14.77	12.68	0.199	7.41	11.08	2.33	0.49	1.105	0.12	-0.52	99.89	37	< 1	267	300	50	130	110	90	18	1.4	< 5	12	189	23.7	84	3.2	< 2	< 0.5	< 0.1	< 1	< 0.2	0.4	121	6.24	14.6	2.05	9.97	3.15	1.19	3.76	0.65	4.04	0.85	2.48	0.352	2.23	0.343
219 1455-1465	49.88	14.9	13.38	0.203	6.98	10.75	2.37	0.46	1.278	0.16	0	100.3	37	< 1	299	250	50	110	120	90	20	1.6	< 5	13	197	26.4	94	3	< 2	< 0.5	< 0.1	< 1	< 0.2	0.3	141	7.12	17	2.33	11.3	3.51	1.23	4.22	0.71	4.42	0.9	2.6	0.379	2.65	0.401
219 1710-1715	50.23	14.68	12.27	0.177	6.45	11.04	3.14	0.5	1.293	0.17	0.51	100.5	38	< 1	301	180	39	90	50	70	19	1.5	< 5	10	370	26.1	95	3.9	< 2	< 0.5	< 0.1	< 1	< 0.2	0.4	168	7.31	17.2	2.4	11.1	3.29	1.15	3.85	0.69	4.36	0.88	2.48	0.374	2.58	0.417
219 1740-1745	50.88	15.85	12.98	0.201	6.3	10.98	2.44	0.4	0.892	0.14	-0.58	100.5	34	< 1	243	170	47	90	130	90	18	1.3	< 5	9	233	22.3	74	2.7	< 2	< 0.5	< 0.1	< 1	< 0.2	0.3	148	6.4	14.8	2.04	9.3	2.67	1.19	3.33	0.62	3.88	0.81	2.29	0.354	2.42	0.386
219 1770-1775	46.45	15.57	13.01	0.193	9.29	10.82	2.13	0.34	0.848	0.09	-0.51	98.24	30	< 1	226	250	61	180	120	80	17	1.3	< 5	8	208	18.3	50	2	< 2	< 0.5	< 0.1	< 1	< 0.2	0.2	118	5.94	13.7	1.87	8.23	2.45	0.999	2.98	0.53	3.36	0.67	2.01	0.291	2.01	0.308
219 1800-1805	49.3	16.47	12.24	0.185	8.07	10.73	2.19	0.37	0.931	0.09	-0.27	100.3	28	< 1	219	150	53	170	120	80	18	1.3	< 5	9	223	18.7	72	2.6	< 2	< 0.5	< 0.1	< 1	< 0.2	0.3	127	5.61	12.5	1.71	8.15	2.12	0.97	2.83	0.51	3.22	0.67	1.94	0.287	1.89	0.301
219 1820-1825	50.07	16.12	12.63	0.191	7.4	10.66	2.34	0.4	1.046	0.12	-0.44	100.5	31	< 1	246	120	51	140	130	90	19	1.3	< 5	9	227	22.1	79	2.8	< 2	< 0.5	< 0.1	< 1	< 0.2	0.3	140	6.57	15	2.04	9.75	2.79	1.09	3.38	0.59	3.73	0.76	2.23	0.335	2.24	0.331
219 2030-2035	49.88	15.37	12.75	0.197	7.37	10.7	2.29	0.43	1.191	0.12	0.03	100.3	35	< 1	279	130	50	130	130	90	18	1.4	< 5	12	219	23.9	83	2.9	< 2	< 0.5	< 0.1	< 1	< 0.2	2.3	145	6.73	16	2.23	10.4	3.04	1.2	3.73	0.64	3.91	0.82	2.35	0.359	2.41	0.378
219 3870-3875	50.85	13.01	13.95	0.215	6.8	11.06	2.39	0.47	1.312	0.17	0.14	100.4	47	< 1	346	50	48	70	160	110	18	1.8	< 5	13	230	30.5	102	3.3	< 2	< 0.5	< 0.1	< 1	< 0.2	0.4	140	9.07	21.3	2.94	13.4	3.84	1.27	4.45	0.83	5.31	1.09	3.21	0.466	3.08	0.472
219 3940-3945	50.31	14.88	12.49	0.19	7.37	11.1	2.24	0.41	1.21	0.11	0.06	100.4	38	< 1	303	180	48	130	140	100	18	1.5	< 5	11	208	22.3	84	3	< 2	< 0.5	< 0.1	< 1	< 0.2	0.3	133	6.58	15.2	2.05	9.46	2.88	1.09	3.23	0.6	3.83	0.79	2.33	0.345	2.3	0.353
260 2225-2230	50.2	14.06	14.09	0.219	7.16	10.8	2.18	0.36	1.578	0.15	0.01	100.8	39	< 1	334	170	50	130	190	100	19	1.5	< 5	9	182	28.1	104	3.8	< 2	< 0.5	< 0.1	1	< 0.2	0.2	108	6.94	17	2.41	12.1	3.84	1.38	4.36	0.78	4.98	1.02	2.88	0.415	2.67	0.414
260 3001.2	0.23	0.07	0.78	0.013	0.62	42.44	11.96	0.01	0.014	< 0.01	42.74	98.88	< 1	< 1	< 5	< 20	2	< 20	30	< 30	< 1	< 0.5	< 5	< 1	38	4.4	< 1	< 0.2	< 2	< 0.5	< 0.1	< 1	< 0.2	< 0.1	4	1.41	2.98	0.37	1.67	0.5	0.088	0.58	0.11	0.71	0.15	0.47	0.069	0.46	0.071
260 3025-3030	49.11	13.89	14.59	0.211	6.05	11.05	3.1	0.41	1.848	0.23	0.12	100.6	37	< 1	350	100	43	70	70	100	21	1.6	< 5	12	220	35.2	133	4.5	< 2	< 0.5	0.1	1	< 0.2	0.3	149	9.72	23.4	3.3	15.4	4.53	1.55	5.71	1	6.03	1.24	3.65	0.529	3.45	0.525
260 3045-3050	49.39	13.87	14.51	0.216	5.83	10.9	2.69	0.49	1.854	0.22	0.32	100.3	37	< 1	348	100	46	70	180	110	21	1.7	< 5	11	230	35.7	137	4.7	< 2	< 0.5	0.1	1	< 0.2	0.3	150	10.4	24.6	3.51	15.9	4.74	1.6	5.8	1.01	6.17	1.26	3.61	0.518	3.36	0.52
260 3060-3065	48.82	14.27	15.36	0.226	5.32	10.37	2.66	0.57	1.964	0.22	0.51	100.3	38	< 1	357	110	46	60	200	120	22	1.5	< 5	14	224	37.3	140	6.3	< 2	< 0.5	< 0.1	1	< 0.2	0.4	167	11.1	25.6	3.66	17.4	5.25	1.63	5.91	1.04	6.8	1.37	4.08	0.563	3.73	0.548
260 3090-3095	48.69	15.26	15.12	0.22	5.79	9.99	2.87	0.56	1.865	0.23	-0.22	100.4	32	< 1	321	70	50	90	230	110	22	1.5	< 5	13	236	36.1	132	6.4	< 2	< 0.5	< 0.1	1	< 0.2	0.4	176	11.3	26.9	3.8	17.4	4.9	1.73	5.97	1.09	6.77	1.37	3.88	0.554	3.66	0.542
277 525bis	48.81	15.51	13.91	0.211	7.47	10.12	2.21	0.52	1.362	0.16	0.1	100.4	30	< 1	265	130	56	150	190	110	20	1.5	< 5	14	218	25.9	98	3.3	< 2	< 0.5	< 0.1	< 1	0.3	0.5	146	7.12	17.1	2.4	11.5	3.38	1.2	3.96	0.72	4.54	0.92	2.63	0.384	2.59	0.399
277 280A	52.23	14.98	10.85	0.141	5.19	11.16	2.76	0.75	1.101	0.16	1.57	100.9	32	< 1	246	30	35	30	< 10	< 30	18	1.5	< 5	25	300	24.2	119	5.6	< 2	< 0.5	< 0.1	< 1	< 0.2	0.7	149	13.5	29.3	3.72	15.6	4.02	1.13	4.03	0.68	4.12	0.83	2.34	0.339	2.3	0.372
277 300	50.95	13.99	10.44	0.126	7.58	11.68	2.28	0.84	0.898	0.1	1.66	100.5	35	< 1	245	130	42	60	40	< 30	16	1.6	< 5	30	299	20.9	94	3.8	< 2	< 0.5	< 0.1	< 1	< 0.2	0.6	256	11.6	25.5	3.26	13.4	3.38	1.04	3.53	0.61	3.77	0.78	2.17	0.311	2.05	0.317
277 325	50.57	14.36	11.03	0.143	6.77	11.01	2.93	0.64	1.047	0.13	1.74	100.3	34	< 1	245	100	39	60	40	< 30	17	1.5	< 5	18	420	21.9	104	3.9	< 2	< 0.5	< 0.1	< 1	< 0.2	1	233	12.8	27	3.39	14.2	3.32	1.04	3.64	0.63	3.78	0.75	2.21	0.321	2.11	0.331
277 440	51.45	17.49	10.55	0.159	4.4	11.83	2.75	0.49	1.195	0.13	0.25	100.7	37	< 1	263	140	32	40	160	90	22	1.6	< 5	12	241	27.2	90	3	< 2	< 0.5	< 0.1	< 1	< 0.2	0.3	142	6.26	15.7	2.31	10.7	3.5	1.32	4.28	0.73	4.65	0.95	2.76	0.392	2.52	0.382
277 495	47.3	15.48	13.85	0.207	8.92	10.03	2.16	0.47	1.246	0.16	0.1	99.91	30	< 1	243	150	61	180	140	100	18	1.5	< 5	12	226	22.7	80	3.5	< 2	< 0.5	< 0.1	< 1	< 0.2	1.1	138	6.31	15	2.17	9.72	3.07	1.16	3.65	0.66	4.19	0.84	2.55	0.338	2.29	0.351
277 505	47.53	15.68	13.88	0.207	8.94	10.35	2.23	0.45	1.202	0.13	-0.01	100.6	31	< 1	255	160	61	180	150	90	18	1.3	< 5	12	221	22.1	74	3.3	< 2	< 0.5	< 0.1	< 1	< 0.2	0.6	136	6.35	14.9	2.12	9.82	3.03	1.16	3.57	0.67	4.13	0.83	2.41	0.342	2.24	0.333
277 515	48.09	16.68	12.74	0.194	8.05	10.8	2.28	0.47	1.162	0.13	0.22	100.8	32	< 1	245	190	147	150	140	80	19	1.4	< 5	12	240	23.1	74	3.6	< 2	< 0.5	< 0.1	< 1	< 0.2	0.6	139	6.61	15.6	2.22	10.3	3.04	1.18	3.72	0.7	4.27	0.88	2.43	0.352	2.33	0.349
277 525	47.7	16.29	13.76	0.208	7.48	10.24	2.36	0.51	1.406	0.15	0.09	100.2	30	< 1	273	130	57	150	200	110	20	1.3	< 5	14	225	25.8	87	4	< 2	< 0.5	< 0.1	< 1	< 0.2	0.6	148	7.65	18.2	2.57	11.8	3.49	1.32	4.46	0.8	4.77	0.97	2.79	0.403	2.53	0.39
277 540	47.83	16	13.78	0.202	7.59	10.32	2.42	0.39	1.388	0.15	0.06	100.1	31	< 1	274	120	57	150	190	90	20	1.3	< 5	10	205	26.2	87	3.9	< 2	< 0.5	< 0.1	< 1	< 0.2	0.4	122	7.49	17.9	2.51	11.9	3.53	1.33	4.33	0.79	4.83	0.99	2.81	0.419	2.66	0.413
277 1800-1805	50.74	14.6	13.74	0.209	5.8	10.86	2.79	0.51	1.571	0.19	-0.5	100.5	37	< 1	338	130	47	80	190	90	21	1.5	< 5	12	206	31.3	106	4.7	< 2	< 0.5	< 0.1	< 1	< 0.2	0.3	165	9.75	23	3.27	14.8	4.41	1.5	5.25	0.93	5.71	1.14	3.36	0.484	3.14	0.478
277 1810-1815	51.02	14.42	13.95	0.212	5.63	10.74	2.71	0.54	1.625	0.2	-0.59	100.4	38	< 1	336	130	45	80	200	100	21	1.5	< 5	13	213	32.4	117	4.9	< 2	< 0.5	< 0.1	1	< 0.2	0.3	173	10.2	23.9	3.35	15.5	4.58	1.53	5.28	0.96	5.95	1.22	3.49	0.505	3.23	0.491
277 1835-1840	51.54	14.21	13.89	0.215	5.18	10.76	2.78	0.57	1.696	0.22	-0.36	100.7	39	< 1	356	110	43	70	200	100	22	1.4	< 5	14	237	35.6	128	5.4	< 2	< 0.5	< 0.1	1	< 0.2	0.4	189	11.2	26.5	3.73	16.9	4.92	1.63	5.74	1.05	6.52	1.33	3.85	0.547	3.5	0.536
277 2085	49.97	14.53	12.97	0.204	6.28	11.47	2.66	0.38	1.395	0.17	0.32	100.4	40	< 1	317	170	46	90	160	80	20	1.4	< 5	9	204	29.9	105	4.4	< 2	< 0.5	< 0.1	< 1	< 0.2	0.3	120	8.6	20.4	2.86	13.4	3.92	1.37	4.9	0.88	5.37	1.12	3.2	0.455	3.04	0.458
277 2100-2105	49.9	14.63	13.38	0.214	5.7	11.32	2.66	0.42	1.619	0.18	0.27	100.3	40	< 1	347	160	43	80	190	90	20	1.5	< 5	10	205	30.1	106	4.8	< 2	< 0.5	< 0.1	< 1	< 0.2	0.3	131	8.9	21.1	3	13.4	4.1	1.46	4.87	0.89	5.54	1.14	3.25	0.481	3.01	0.445
277 2110-2115	50.42	14.64	12.62	0.205	5.74	11.52	2.69	0.4	1.272	0.17	0.56	100.3	40	< 1	285	150	44	70	190	80	20	1.3	< 5	10	204	30.4	102	4.3	< 2	< 0.5	< 0.1	< 1	< 0.2	0.3	123	8.5	20.4	2.85	12.9	4.05	1.45	4.7	0.89	5.42	1.09	3.23	0.471	3.08	0.453
277 2280-2285	51.76	12.55	16.39	0.244	3.68	9.56	3.02	0.75	2.309	0.3	0.21	100.8	43	1	410	30	40	50	240	120	24	1.6	< 5	19	254	49.2	178	8.2	< 2	0.8	0.1	2	< 0.2	0.5	218	16.4	37.7	5.27	23.4	6.87	2.08	8.31	1.5	9.22	1.86	5.31	0.767	5.04	0.749
277 2320-2325	49.84	10.46	18.61	0.282	5.09	10.07	2.63	0.68	2.627	0.24	-0.13	100.4	59	< 1	706	< 20	50	50	260	120	21	1.8	< 5	17	218	45.1	157	5.8	< 2	0.6	0.1	1	< 0.2	0.5	186	12.5	29.5	4.14	19	6	1.73	7.31	1.33	8.34	1.68	4.88	0.7	4.56	0.694
277 2380-2385	48.61	17.08	12.33	0.183	8.41	10.36	2.32	0.31	0.896	0.11	-0.08	100.5	24	< 1	182	70	56	170	120	70	18	1.2	< 5	7	196	19	67	2.8	< 2	< 0.5	< 0.1	< 1	< 0.2	0.2	99	5.69	13.2	1.83	8.27	2.44	1.01	3	0.56	3.45	0.72	2.16	0.316	2	0.308
277 2945-2950	51.87	12.15	14.82	0.248	4.96	10.77	2.71	0.86	1.85	0.24	0.26	100.7	51	1	389	< 20	41	40	240	110	21	1.8	< 5	22	250	44.9	155	6.2	< 2	0.5	0.1	2	< 0.2	0.6	242	14.8	34.4	4.69	20.9	5.95	1.92	7.18	1.35	8.29	1.71	4.9	0.713	4.5	0.715
219 3930.6	48.46	15.48	12.49	0.196	7.95	11.1	2.34	0.43	1.087	0.12	0.26	99.91	32	1	264	120	52	150	130	100	17	1.2	< 5	11	208	22.3	73	3.3	< 2	< 0.5	< 0.1	< 1	< 0.2	0.5	140	7.28	16.6	2.27	9.93	2.92	1.06	3.62	0.63	4	0.82	2.37	0.347	2.26	0.343
260 2200	10.43	1.75	0.64	0.019	17.21	29.76	0.27	1.55	0.086	0.04	33.22	94.98	2	< 1	17	< 20	< 1	< 20	10	< 30	2	0.5	< 5	13	1025	4.6	17	1.6	< 2	< 0.5	< 0.1	< 1	< 0.2	0.2	85	3.53	8.63	1.05	4.01	0.79	0.173	0.76	0.12	0.75	0.16	0.49	0.073	0.49	0.071
260 2204.8	47.99	14.02	14.18	0.227	6.68	11.38	2.51	0.42	1.531	0.16	1.26	100.4	38	< 1	325	140	49	100	200	120	20	1.5	< 5	10	223	29.2	102	4.4	< 2	< 0.5	< 0.1	< 1	< 0.2	0.3	119	7.84	18.9	2.71	13	4.02	1.38	4.79	0.88	5.57	1.12	3.13	0.447	2.9	0.454
260 2998.45	2.44	0.59	0.37	0.014	15.42	36.1	0.14	0.06	0.032	0.02	43.71	98.91	< 1	< 1	15	< 20	< 1	< 20	< 10	< 30	< 1	< 0.5	< 5	2	103	1.9	5	0.4	< 2	< 0.5	< 0.1	< 1	< 0.2	< 0.1	6	1.97	4.78	0.6	2.2	0.5	0.086	0.41	0.06	0.34	0.06	0.16	0.02	0.11	0.017
260 3000.3	0.46	0.14	0.38	0.019	14.89	37.35	0.39	0.02	0.007	0.01	45.85	99.52	< 1	< 1	9	< 20	< 1	< 20	< 10	< 30	< 1	< 0.5	< 5	< 1	68	< 0.5	< 1	< 0.2	< 2	< 0.5	< 0.1	< 1	< 0.2	< 0.1	5	0.71	1.33	0.16	0.54	0.13	0.04	0.08	0.01	0.1	0.02	0.03	< 0.005	0.02	0.004
260 3004.9	45.72	13.27	11.98	0.159	6.8	13.02	3.88	0.5	1.672	0.18	2.57	99.75	35	< 1	315	90	34	70	80	< 30	20	1.4	< 5	10	268	31.8	113	5.2	< 2	< 0.5	< 0.1	< 1	< 0.2	0.2	93	8.39	20.7	2.98	14.2	4.42	1.38	5.21	0.95	5.81	1.2	3.46	0.485	3.2	0.5
260 3006.9	48.16	13.61	14.78	0.214	5.67	11.25	2.96	0.61	1.787	0.22	0.86	100.1	37	< 1	345	100	50	80	250	100	21	1.3	< 5	15	228	34.8	120	5.7	< 2	< 0.5	< 0.1	1	< 0.2	0.5	155	10.5	25.1	3.5	16.2	4.83	1.61	5.8	1.02	6.33	1.26	3.74	0.544	3.56	0.529
260 3008.2	48.32	14.11	14.27	0.208	5.7	10.57	3.34	0.48	1.644	0.2	1	99.84	35	< 1	327	90	46	80	120	80	21	1.5	< 5	11	213	31.9	115	5.4	< 2	< 0.5	< 0.1	< 1	< 0.2	0.3	133	9.58	23	3.2	15	4.57	1.45	5.15	0.95	5.88	1.21	3.47	0.5	3.25	0.509
274 1798.3	49.13	15.15	12.64	0.186	8.01	11.1	2.28	0.43	1.127	0.12	0.4	100.6	33	< 1	269	150	53	150	130	70	18	1.3	< 5	10	209	22.3	77	4	< 2	< 0.5	< 0.1	< 1	< 0.2	0.2	119	7.33	16.8	2.3	10.3	2.86	1.01	3.55	0.63	4.1	0.82	2.38	0.36	2.33	0.352
274 1800.8	49.56	15	12.09	0.194	8.26	11.3	2.2	0.41	1.084	0.13	0.53	100.8	35	< 1	277	190	53	160	130	100	17	1.4	< 5	10	213	22	75	3.7	< 2	< 0.5	< 0.1	< 1	< 0.2	0.3	126	7.24	16.7	2.29	10.1	2.97	1.06	3.52	0.65	4.16	0.8	2.37	0.353	2.32	0.366
275 2634.2	45.02	13.92	13.37	0.226	6.37	10.85	3.56	0.4	1.431	0.16	3.48	98.77	35	< 1	301	150	48	110	150	190	20	1.5	< 5	9	262	28.3	78	3.8	< 2	< 0.5	< 0.1	< 1	< 0.2	0.4	161	7.27	17	2.49	11.9	3.68	1.32	4.58	0.79	4.84	1	2.95	0.421	2.7	0.4
275 2637.9	48.49	14.59	14.19	0.217	6.72	11.04	2.68	0.42	1.552	0.17	0.37	100.4	37	< 1	324	150	51	110	220	100	20	1.5	< 5	10	179	29.8	100	5.7	< 2	< 0.5	< 0.1	1	< 0.2	0.3	122	7.62	18.5	2.62	12.4	3.9	1.39	4.76	0.82	5.07	1.04	3.14	0.452	2.87	0.416
277 2420.6	49.75	17.23	10.82	0.169	5.93	12.01	2.54	0.44	1.331	0.14	0.33	100.7	35	< 1	318	170	39	110	140	80	21	1.5	< 5	10	235	24.8	83	4.6	< 2	< 0.5	< 0.1	< 1	< 0.2	0.3	107	6.89	16.1	2.28	10.8	3.18	1.2	3.88	0.68	4.32	0.88	2.53	0.365	2.36	0.354
Report Number: A18-09178
Report Date: 5/9/2018
Analyte Symbol	SiO2	Al2O3	Fe2O3(T)	MnO	MgO	CaO	Na2O	K2O	TiO2	P2O5	LOI	Total	Sc	Be	V	Cr	Co	Ni	Cu	Zn	Ga	Ge	As	Rb	Sr	Y	Zr	Nb	Mo	Ag	In	Sn	Sb	Cs	Ba	La	Ce	Pr	Nd	Sm	Eu	Gd	Tb	Dy	Ho	Er	Tm	Yb	Lu
Unit Symbol	%	%	%	%	%	%	%	%	%	%	%	%	ppm	ppm	ppm	ppm	ppm	ppm	ppm	ppm	ppm	ppm	ppm	ppm	ppm	ppm	ppm	ppm	ppm	ppm	ppm	ppm	ppm	ppm	ppm	ppm	ppm	ppm	ppm	ppm	ppm	ppm	ppm	ppm	ppm	ppm	ppm	ppm	ppm
Detection Limit	0.01	0.01	0.01	0.001	0.01	0.01	0.01	0.01	0.001	0.01		0.01	1	1	5	20	1	20	10	30	1	0.5	5	1	2	0.5	1	0.2	2	0.5	0.1	1	0.2	0.1	2	0.05	0.05	0.01	0.05	0.01	0.005	0.01	0.01	0.01	0.01	0.01	0.005	0.01	0.002
Analysis Method	FUS-ICP	FUS-ICP	FUS-ICP	FUS-ICP	FUS-ICP	FUS-ICP	FUS-ICP	FUS-ICP	FUS-ICP	FUS-ICP	FUS-ICP	FUS-ICP	FUS-ICP	FUS-ICP	FUS-ICP	FUS-MS	FUS-MS	FUS-MS	FUS-MS	FUS-MS	FUS-MS	FUS-MS	FUS-MS	FUS-MS	FUS-ICP	FUS-MS	FUS-ICP	FUS-MS	FUS-MS	FUS-MS	FUS-MS	FUS-MS	FUS-MS	FUS-MS	FUS-ICP	FUS-MS	FUS-MS	FUS-MS	FUS-MS	FUS-MS	FUS-MS	FUS-MS	FUS-MS	FUS-MS	FUS-MS	FUS-MS	FUS-MS	FUS-MS	FUS-MS
NIST 694 Meas	11.2	1.88	0.72	0.01	0.33	42.27	0.91	0.53	0.12	30.19					1598
NIST 694 Cert	11.2	1.8	0.79	0.0116	0.33	43.6	0.86	0.51	0.11	30.2					1740
DNC-1 Meas	47.15	17.95	9.76	0.15	9.93	11.56	1.94	0.22	0.47	0.07			31		154	280	55	270	110	60	14			4	141	17.6	33						0.9		106	3.7			5.1		0.57							2
DNC-1 Cert	47.15	18.34	9.97	0.15	10.13	11.49	1.89	0.234	0.48	0.07			31		148	270	57	247	100	70	15			5	144	18	38						0.96		118	3.6			5.2		0.59							2
LKSD-3 Meas																80	29		40	150			25	78		28.8			< 2	2.5		2		2.1		49.9	91.2		46.3	8.1	1.4			5				2.7	0.42
LKSD-3 Cert																87	30		35	152			27	78		30			2	2.7		3		2.3		52	90		44	8	1.5			4.9				2.7	0.4
TDB-1 Meas																250		100	330	160						34.7										17.2	39.9		24.5		2							3.2
TDB-1 Cert																251		92	323	155						36										17	41		23		2.1							3.4
TDB-1 Meas																250		100	330	160						34.7										17.2	39.9		24.5		2							3.2
TDB-1 Cert																251		92	323	155						36										17	41		23		2.1							3.4
W-2a Meas	52.17	15.57	10.76	0.17	6.18	11.2	2.23	0.62	1.08	0.13			35	< 1	274	90	43	70	110	80	18	1.5		19	197	21.5	90	7.9	< 2				0.7	0.9	175	11	23.8		13.1	3.4			0.64	3.9	0.78			2.1	0.31
W-2a Cert	52.4	15.4	10.7	0.163	6.37	10.9	2.14	0.626	1.06	0.14			36	1.3	262	92	43	70	110	80	17	1		21	190	24	94	7.9	0.6				0.79	0.99	182	10	23		13	3.3			0.63	3.6	0.76			2.1	0.33
W-2a Meas																90	43	70	110	80	18	1.5		19		21.5		7.9	< 2				0.7	0.9		11	23.8		13.1	3.4			0.64	3.9	0.78			2.1	0.31
W-2a Cert																92	43	70	110	80	17	1		21		24		7.9	0.6				0.79	0.99		10	23		13	3.3			0.63	3.6	0.76			2.1	0.33
SY-4 Meas	50.23	20.72	6.12	0.11	0.49	8.22	6.84	1.67	0.29	0.13			1	3	6										1205		523								348
SY-4 Cert	49.9	20.69	6.21	0.108	0.54	8.05	7.1	1.66	0.287	0.131			1.1	2.6	8										1191		517								340
CTA-AC-1 Meas																			60	40						283										> 2000	> 3000		1000	176	46.8	129	14					11.1	1.12
CTA-AC-1 Cert																			54	38						272										2176	3326		1087	162	46.7	124	13.9					11.4	1.08
BIR-1a Meas	47.47	15.76	11.35	0.17	9.47	13.58	1.84	0.02	0.96	0.02			44	< 1	331		51	180	140	70	16				108	15.1	14	0.7							8	0.6	1.9		2.4	1.2	0.5	1.9						1.8
BIR-1a Cert	47.96	15.5	11.3	0.175	9.7	13.3	1.82	0.03	0.96	0.021			44	0.58	310		52	170	125	70	16				110	16	18	0.6							6	0.63	1.9		2.5	1.1	0.55	2						1.7
NCS DC86312 Meas																										990										> 2000	189		1650			237	31.2	191	35.7	100	13.9	88.4	12.1
NCS DC86312 Cert																										976										2360	190		1600			225	34.6	183	36	96.2	15.1	87.79	11.96
NCS DC70009 (GBW07241) Meas																			1030	90	16	10	64	465		129				1.6	1	> 1000		39.4		24.4	60.4	8.1	34.4	13.3	0.12	14.9	3	21.6	4.3	13.4	2.2	16.3	2.31
NCS DC70009 (GBW07241) Cert																			960	100	16.5	11.2	69.9	500		128				1.8	1.3	1700		41		23.7	60.3	7.9	32.9	12.5	0.16	14.8	3.3	20.7	4.5	13.4	2.2	14.9	2.4
OREAS 100a (Fusion) Meas																	17		180							128			24							265	471	47.3	158	25.4	3.7			23.9	4.93	15.2	2.3	15.3	2.16
OREAS 100a (Fusion) Cert																	18.1		169							142			24.1							260	463	47.1	152	23.6	3.71			23.2	4.81	14.9	2.31	14.9	2.26
OREAS 101a (Fusion) Meas																	45		440							181			20							806	1490	131	413	52.4	8.09			32.8	6.6	19.7	2.8	18.1	2.52
OREAS 101a (Fusion) Cert																	48.8		430							183			21.9							816	1396	134	403	48.8	8.06			33.3	6.46	19.5	2.9	17.5	2.66
OREAS 101b (Fusion) Meas																	44		410							178			20							790	1430	125	380	49	8.05		5.2	31.2	6.28	18.7	2.71	17.9	2.56
OREAS 101b (Fusion) Cert																	47		420							178			21							789	1331	127	378	48	7.77		5.37	32.1	6.34	18.7	2.66	17.6	2.58
OREAS 101b (Fusion) Meas																	44		410							178			20							790	1430	125	380	49	8.05		5.2	31.2	6.28	18.7	2.71	17.9	2.56
OREAS 101b (Fusion) Cert																	47		420							178			21							789	1331	127	378	48	7.77		5.37	32.1	6.34	18.7	2.66	17.6	2.58
JR-1 Meas																		< 20		< 30	16	2	16	260		48.1		14.5	3		< 0.1	3	1.1	19.7		19.9	47.2	5.8	23.7	5.88	0.27		0.94				0.67	4.83	0.71
JR-1 Cert																		1.67		30.6	16.1	1.88	16.3	257		45.1		15.2	3.25		0.028	2.86	1.19	20.8		19.7	47.2	5.58	23.3	6.03	0.3		1.01				0.67	4.55	0.71
260 3025-3030 Orig	49.11	13.89	14.59	0.211	6.05	11.05	3.1	0.41	1.848	0.23	0.12	100.6	37	< 1	350	100	43	70	70	100	21	1.6	< 5	12	220	35.2	133	4.5	< 2	< 0.5	0.1	1	< 0.2	0.3	149	9.72	23.4	3.3	15.4	4.53	1.55	5.71	1	6.03	1.24	3.65	0.529	3.45	0.525
277 2085 Orig	49.94	14.64	12.91	0.204	6.22	11.45	2.66	0.38	1.398	0.17	0.32	100.3	40	< 1	317	170	45	90	160	80	19	1.4	< 5	9	206	29.7	105	4.4	< 2	< 0.5	< 0.1	< 1	< 0.2	0.3	119	8.55	20.2	2.85	13.2	3.82	1.36	4.97	0.88	5.36	1.1	3.15	0.451	3	0.449
277 2085 Dup	50.01	14.42	13.04	0.204	6.34	11.48	2.67	0.38	1.392	0.17	0.32	100.4	41	< 1	317	180	46	90	160	80	20	1.4	< 5	9	203	30.1	104	4.4	< 2	< 0.5	< 0.1	< 1	< 0.2	0.3	120	8.65	20.5	2.86	13.7	4.02	1.38	4.84	0.89	5.38	1.14	3.25	0.459	3.08	0.467
277 2420.6 Orig	50.03	17.21	10.73	0.169	5.92	11.96	2.54	0.44	1.331	0.14	0.33	100.8	35	< 1	318	170	40	110	140	80	21	1.5	< 5	10	235	24.6	85	4.7	< 2	< 0.5	< 0.1	< 1	< 0.2	0.3	107	6.98	16.2	2.28	10.8	3.21	1.21	3.9	0.67	4.38	0.89	2.51	0.362	2.38	0.354
277 2420.6 Dup	49.47	17.25	10.9	0.17	5.94	12.06	2.55	0.44	1.331	0.13	0.33	100.6	35	< 1	318	170	38	110	140	80	21	1.6	< 5	10	235	25	82	4.6	< 2	< 0.5	< 0.1	< 1	< 0.2	0.3	107	6.8	16	2.28	10.7	3.15	1.19	3.86	0.68	4.26	0.87	2.54	0.369	2.34	0.355
Method Blank	0.01	< 0.01	< 0.01	0.007	< 0.01	0.01	0.01	< 0.01	0.001	< 0.01			< 1	< 1	< 5										< 2		< 1								2
Method Blank	0.01	< 0.01	< 0.01	0.007	< 0.01	0.01	0.01	< 0.01	0.001	< 0.01			< 1	< 1	< 5	< 20	< 1	< 20	< 10	< 30	< 1	< 0.5	< 5	< 1	< 2	< 0.5	< 1	< 0.2	< 2	< 0.5	< 0.1	< 1	< 0.2	< 0.1	2	< 0.05	< 0.05	< 0.01	< 0.05	< 0.01	< 0.005	< 0.01	< 0.01	< 0.01	< 0.01	< 0.01	< 0.005	< 0.01	< 0.002
Method Blank	0.01	< 0.01	< 0.01	0.007	< 0.01	0.01	0.01	< 0.01	0.001	< 0.01			< 1	< 1	< 5										< 2		< 1								2
Method Blank	< 0.01	< 0.01	< 0.01	0.007	< 0.01	< 0.01	< 0.01	< 0.01	< 0.001	0.01			< 1	< 1	< 5	< 20	< 1	< 20	< 10	< 30	< 1	< 0.5	< 5	< 1	< 2	< 0.5	< 1	< 0.2	< 2	< 0.5	< 0.1	< 1	< 0.2	< 0.1	< 2	< 0.05	< 0.05	< 0.01	< 0.05	< 0.01	< 0.005	< 0.01	< 0.01	< 0.01	< 0.01	< 0.01	< 0.005	< 0.01	< 0.002
Method Blank	< 0.01	< 0.01	< 0.01	0.007	< 0.01	< 0.01	< 0.01	< 0.01	< 0.001	0.01			< 1	< 1	< 5										< 2		< 1								< 2
Method Blank	< 0.01	< 0.01	< 0.01	0.007	< 0.01	< 0.01	< 0.01	< 0.01	< 0.001	< 0.01			< 1	< 1	< 5										< 2		< 1								< 2
[truncated: 8 more columns]
